# Supplementary material for: Determination of metabolite differences between loquat nectar and honey by UPLC-MS/MS
Source: PeerJ journal article supplement (doi:10.7717/peerj.19988), 2025-09-16
Supplement: Table_S1.xlsx [file Table_S1.xlsx]

## Sheet: Sheet1
Table S1 Chemicals and reagents
compound	CAS number	purity	brand	product number
methanol	67-56-1	chromatographically pure	Merck	1.06007.4008
acetonitrile	75-05-8	chromatographically pure	Merck	1.00030.4008
Acetic acid	64-19-7	chromatographically pure	luoen	R009611-500ml
formic acid	64-18-6	chromatographically pure	sigma	5438040250
