# Supplementary material for: Determination of metabolite differences between loquat nectar and honey by UPLC-MS/MS
Source: PeerJ journal article supplement (doi:10.7717/peerj.19988), 2025-09-16
Supplement: Table_S2.xlsx [file Table_S2.xlsx]

## Sheet: Sheet1
Table S2 The standard sample information used for quantitative analysis.
Compounds	Ion mode	Q1 (Da)	Q3 (Da)	Molecular weight (Da)	Formula	Adduct	Class I	CAS
L-Asparagine	Positive	133.06	74.02	132.0535	C4H8N2O3	[M+H]+	Amino acids and derivatives	70-47-3
Syringin	Negative	371.13	209.08	372.142	C17H24O9	[M-H]-	Phenolic acids	118-34-3
Ferulic acid*	Negative	193.05	134.04	194.0579	C10H10O4	[M-H]-	Phenolic acids	537-98-4
Spermidine	Positive	146.17	72.08	145.1579	C7H19N3	[M+H]+	Alkaloids	124-20-9
Spermine	Positive	203.22	84.08	202.2157	C10H26N4	[M+H]+	Alkaloids	71-44-3
N-Ethylglycine*	Positive	104.07	58.07	103.0633	C4H9NO2	[M+H]+	Amino acids and derivatives	627-01-0
Syringic acid	Negative	197.05	123.01	198.0528	C9H10O5	[M-H]-	Phenolic acids	530-57-4
Vanillic acid	Negative	167.03	108.02	168.0423	C8H8O4	[M-H]-	Phenolic acids	121-34-6
Hesperetin-7-O-rutinoside (Hesperidin)	Negative	609.18	301.09	610.1898	C28H34O15	[M-H]-	Flavonoids	520-26-3
Nobiletin (5,6,7,8,3',4'-Hexamethoxyflavone)	Positive	403.14	373.1	402.1315	C21H22O8	[M+H]+	Flavonoids	478-01-3
Catechin	Negative	289.07	245.08	290.079	C15H14O6	[M-H]-	Flavonoids	154-23-4
Tangeretin (4',5,6,7,8-Pentamethoxyflavone)*	Positive	373.13	343.09	372.1209	C20H20O7	[M+H]+	Flavonoids	481-53-8
Quercetin-3-O-galactoside (Hyperin)	Negative	463.09	300.03	464.0955	C21H20O12	[M-H]-	Flavonoids	482-36-0
Indole-5-carboxylic acid*	Negative	160.04	116.05	161.0477	C9H7NO2	[M-H]-	Alkaloids	1670-81-1
Indole-3-carboxaldehyde	Positive	146.06	91.05	145.0528	C9H7NO	[M+H]+	Alkaloids	487-89-8
Myristic Acid	Negative	227.2	59.01	228.2089	C14H28O2	[M-H]-	Lipids	544-63-8
Choline Alfoscerate	Positive	258.11	104.11	257.1028	C8H20NO6P	[M+H]+	Lipids	28319-77-9
Nicotinamide	Positive	123.06	80.05	122.048	C6H6N2O	[M+H]+	Others	98-92-0
Chlorogenic acid (3-O-Caffeoylquinic acid)*	Negative	353.09	191.06	354.0951	C16H18O9	[M-H]-	Phenolic acids	327-97-9
Chlorogenic acid methyl ester	Negative	367.1	190.9	368.1107	C17H20O9	[M-H]-	Phenolic acids	29708-87-0
2,5-Dihydroxybenzoic acid; Gentisic Acid*	Negative	153.019	109.029	154.0266	C7H6O4	[M-H]-	Phenolic acids	490-79-9
3,4-Dihydroxybenzoic acid (Protocatechuic acid)*	Negative	153.02	109.03	154.0266	C7H6O4	[M-H]-	Phenolic acids	99-50-3
Succinic acid*	Negative	117.02	73.03	118.0266	C4H6O4	[M-H]-	Organic acids	110-15-6
Adipic Acid*	Negative	145.05	101.06	146.0579	C6H10O4	[M-H]-	Organic acids	124-04-9
D-Sorbitol	Negative	181.07	71.01	182.079	C6H14O6	[M-H]-	Others	50-70-4
Trans-4-Hydroxy-L-proline	Positive	132.07	86.06	131.0582	C5H9NO3	[M+H]+	Amino acids and derivatives	51-35-4
L-Cystine	Positive	241.03	151.98	240.0238	C6H12N2O4S2	[M+H]+	Amino acids and derivatives	56-89-3
DL-Methionine	Positive	150.06	61.01	149.051	C5H11NO2S	[M+H]+	Amino acids and derivatives	59-51-8
Riboflavin (Vitamin B2)	Positive	377.15	243.09	376.1383	C17H20N4O6	[M+H]+	Others	83-88-5
Azelaic acid	Negative	187.1	125.1	188.1049	C9H16O4	[M-H]-	Organic acids	123-99-9
Suberic Acid	Negative	173.08	111.08	174.0892	C8H14O4	[M-H]-	Organic acids	505-48-6
Uridine	Negative	243.06	110.02	244.0695	C9H12N2O6	[M-H]-	Nucleotides and derivatives	58-96-8
L-Tyrosine*	Positive	182.08	136.08	181.0739	C9H11NO3	[M+H]+	Amino acids and derivatives	60-18-4
Thymine	Positive	127.05	110.02	126.0429	C5H6N2O2	[M+H]+	Nucleotides and derivatives	65-71-4
L-Histidine	Positive	156.08	110.07	155.0695	C6H9N3O2	[M+H]+	Amino acids and derivatives	71-00-1
Cytosine	Positive	112.05	95.02	111.0433	C4H5N3O	[M+H]+	Nucleotides and derivatives	71-30-7
L-Valine	Positive	118.09	72.08	117.079	C5H11NO2	[M+H]+	Amino acids and derivatives	72-18-4
L-Arginine	Positive	175.12	116.07	174.1117	C6H14N4O2	[M+H]+	Amino acids and derivatives	74-79-3
L-Tartaric acid	Negative	149.01	87.01	150.0164	C4H6O6	[M-H]-	Organic acids	87-69-4
DL-3-Phenyllactic acid	Negative	165.06	119.05	166.063	C9H10O3	[M-H]-	Organic acids	828-01-3
L-Malic acid*	Negative	133.01	71.01	134.0215	C4H6O5	[M-H]-	Organic acids	97-67-6
Quinic Acid	Negative	191.06	85.03	192.0634	C7H12O6	[M-H]-	Organic acids	77-95-2
Citric Acid	Negative	191.02	111.01	192.027	C6H8O7	[M-H]-	Organic acids	77-92-9
L-Tryptophan	Negative	203.08	116.05	204.0899	C11H12N2O2	[M-H]-	Amino acids and derivatives	73-22-3
LysoPE 18:1*	Positive	480.31	339.29	479.3012	C23H46NO7P	[M+H]+	Lipids	89576-29-4
2-Hydroxyisocaproic acid	Negative	131.07	85.07	132.0786	C6H12O3	[M-H]-	Organic acids	20312-37-2
D-Xylonic acid	Negative	165.04	75.01	166.0477	C5H10O6	[M-H]-	Others	526-91-0
Catechin gallate	Negative	441.08	169.01	442.09	C22H18O10	[M-H]-	Flavonoids	130405-40-2
Palmitoleic Acid*	Negative	253.217	235.207	254.2246	C16H30O2	[M-H]-	Lipids	373-49-9
α-Linolenic Acid	Negative	277.22	277.22	278.2246	C18H30O2	[M-H]-	Lipids	463-40-1
Fumaric acid	Negative	115	71.01	116.011	C4H4O4	[M-H]-	Organic acids	110-17-8
Citraconic acid	Negative	129.02	85.03	130.0266	C5H6O4	[M-H]-	Organic acids	498-23-7
Trans-dehydrorosinone	Negative	287.2	269.21	288.2089	C19H28O2	[M-H]-	Others	53-43-0
L-Arabitol	Negative	151.06	59.01	152.0685	C5H12O5	[M-H]-	Others	7643-75-6
N(6),N(6)-Dimethyl-L-lysine	Positive	175.12	70.07	174.1368	C8H18N2O2	[M+H]+	Amino acids and derivatives	2259-86-1
Homoproline	Positive	130.09	70.07	129.079	C6H11NO2	[M+H]+	Amino acids and derivatives	56879-46-0
D-Allo-Isoleucine*	Positive	132.1	86.1	131.0946	C6H13NO2	[M+H]+	Amino acids and derivatives	1509-35-9
3-Hydroxy-L-phenylalanine*	Positive	182.08	136.08	181.0739	C9H11NO3	[M+H]+	Amino acids and derivatives	587-33-7
Vanillin; 4-Hydroxy-3-Methoxybenzaldehyde	Negative	151.04	136.02	152.0473	C8H8O3	[M-H]-	Others	121-33-5
3-(4-Hydroxyphenyl)-propionic acid	Negative	165.06	119.05	166.063	C9H10O3	[M-H]-	Phenolic acids	501-97-3
Methylmalonic acid*	Negative	117.019	73.0295	118.0266	C4H6O4	[M-H]-	Organic acids	516-05-2
2-Methylsuccinic acid*	Negative	131.03	87.05	132.0423	C5H8O4	[M-H]-	Organic acids	498-21-5
1,6-anhydro-β-D-glucose	Negative	161.05	71.01	162.0528	C6H10O5	[M-H]-	Others	498-07-7
4-Guanidinobutyric acid	Positive	146.09	87.04	145.0851	C5H11N3O2	[M+H]+	Organic acids	463-00-3
3-Hydroxybutyric acid	Negative	103.04	59.01	104.0473	C4H8O3	[M-H]-	Organic acids	300-85-6
S-(Methyl)glutathione	Positive	322.11	130.05	321.0995	C11H19N3O6S	[M+H]+	Amino acids and derivatives	2922-56-7
4-Hydroxybenzaldehyde	Negative	121.03	92.03	122.0368	C7H6O2	[M-H]-	Others	123-08-0
L-Aspartyl-L-Phenylalanine	Positive	281.11	166.09	280.1059	C13H16N2O5	[M+H]+	Amino acids and derivatives	13433-09-5
2,3-Dihydroxybenzoic Acid*	Negative	153.02	109.03	154.0266	C7H6O4	[M-H]-	Phenolic acids	303-38-8
Xanthosine	Negative	283.07	151.03	284.0757	C10H12N4O6	[M-H]-	Nucleotides and derivatives	146-80-5
L-Homoserine	Positive	120.07	74.06	119.0582	C4H9NO3	[M+H]+	Amino acids and derivatives	672-15-1
β-Nicotinamide mononucleotide	Positive	335.06	123.06	334.0566	C11H15N2O8P	[M+H]+	Nucleotides and derivatives	1094-61-7
1-Caffeoylquinic acid	Negative	353.09	191.06	354.0951	C16H18O9	[M-H]-	Phenolic acids	1241-87-8
4-Hydroxybenzoic acid	Negative	137.02	93.03	138.0317	C7H6O3	[M-H]-	Phenolic acids	99-96-7
Pinocembrin (Dihydrochrysin)	Negative	255.07	151	256.0736	C15H12O4	[M-H]-	Flavonoids	480-39-7
Poncirin (Isosakuranetin-7-O-neohesperidoside)*	Negative	593.19	285.08	594.1949	C28H34O14	[M-H]-	Flavonoids	14941-08-3
L-Pipecolic Acid	Positive	130.09	84.08	129.079	C6H11NO2	[M+H]+	Organic acids	3105-95-1
1-Methyladenine	Positive	150.08	133.05	149.0701	C6H7N5	[M+H]+	Nucleotides and derivatives	5142-22-3
Quercetin-4'-O-glucoside (Spiraeoside)*	Negative	463.09	301.04	464.0955	C21H20O12	[M-H]-	Flavonoids	20229-56-5
2-Deoxyribose-5'-phosphate*	Negative	213.02	96.97	214.0242	C5H11O7P	[M-H]-	Nucleotides and derivatives	102916-66-5
D-Threonic Acid	Negative	135.03	75.01	136.0372	C4H8O5	[M-H]-	Others	3909-12-4
p-Coumaryl alcohol	Negative	149.06	131.05	150.0681	C9H10O2	[M-H]-	Phenolic acids	3690-05-9
2-Methylglutaric acid*	Negative	145.05	101.06	146.0579	C6H10O4	[M-H]-	Organic acids	617-62-9
6-Hydroxyhexanoic acid	Negative	131.07	85.07	132.0786	C6H12O3	[M-H]-	Organic acids	1191-25-9
Fustin	Negative	287.06	149.02	288.0634	C15H12O6	[M-H]-	Flavonoids	20725-03-5
Coumarin	Positive	147.04	103.05	146.0368	C9H6O2	[M+H]+	Lignans and Coumarins	91-64-5
p-Coumaraldehyde	Negative	147.05	129.03	148.0524	C9H8O2	[M-H]-	Phenolic acids	2538-87-6
Pantetheine	Negative	277.12	146.08	278.13	C11H22N2O4S	[M-H]-	Alkaloids	496-65-1
O-Acetylserine	Positive	148.06	88.04	147.0532	C5H9NO4	[M+H]+	Amino acids and derivatives	5147-00-2
S-Adenosylmethionine	Positive	399.14	250.09	399.1445	C15H23N6O5S+	[M]+	Amino acids and derivatives	485-80-3
9-(Arabinosyl)hypoxanthine	Negative	267.07	135.03	268.0808	C10H12N4O5	[M-H]-	Nucleotides and derivatives	7013-16-3
Scoparone	Positive	207.07	151.08	206.0579	C11H10O4	[M+H]+	Lignans and Coumarins	120-08-1
D-Mannitol*	Negative	181.072	101.024	182.079	C6H14O6	[M-H]-	Others	69-65-8
D-Fructose*	Negative	179.056	59.0139	180.0634	C6H12O6	[M-H]-	Others	57-48-7
3-O-Acetylpinobanksin	Negative	313.07	253.05	314.079	C17H14O6	[M-H]-	Flavonoids	52117-69-8
D-Galacturonic acid*	Negative	193.04	72.99	194.0427	C6H10O7	[M-H]-	Others	685-73-4
p-Coumaric acid methyl ester	Positive	179.07	147.04	178.063	C10H10O3	[M+H]+	Phenolic acids	19367-38-5
Kaempferol-3-O-(6''-p-Coumaroyl)glucoside (Tiliroside)	Negative	593.13	285.04	594.1373	C30H26O13	[M-H]-	Flavonoids	20316-62-5
Quercetin-7-O-glucoside	Negative	463.09	301.04	464.0955	C21H20O12	[M-H]-	Flavonoids	491-50-9
Melibiose	Negative	341.11	113.02	342.1162	C12H22O11	[M-H]-	Others	585-99-9
D-Pantothenic Acid	Positive	220.12	90.05	219.1107	C9H17NO5	[M+H]+	Others	79-83-4
DL-2-Aminoadipic acid	Positive	162.08	98.06	161.0688	C6H11NO4	[M+H]+	Alkaloids	542-32-5
Nicotianamine	Positive	304.15	185.09	303.143	C12H21N3O6	[M+H]+	Alkaloids	34441-14-0
Lumichrome	Positive	243.09	145.08	242.0804	C12H10N4O2	[M+H]+	Alkaloids	1086-80-2
L-Theanine	Positive	175.11	84.04	174.1004	C7H14N2O3	[M+H]+	Amino acids and derivatives	3081-61-6
Indole-3-carboxylic acid*	Negative	160.04	116.05	161.0477	C9H7NO2	[M-H]-	Alkaloids	771-50-6
Vomifoliol (Blumenol A)	Negative	223.13	161.1	224.1412	C13H20O3	[M-H]-	Terpenoids	189351-15-3
1,3-O-Dicaffeoylquinic Acid (Cynarin)	Negative	515.12	191.03	516.1268	C25H24O12	[M-H]-	Phenolic acids	30964-13-7
L-Norleucine*	Positive	132.1	86.1	131.0946	C6H13NO2	[M+H]+	Amino acids and derivatives	327-57-1
D-Panose*	Negative	503.16	179.06	504.169	C18H32O16	[M-H]-	Others	33401-87-5
Bengenin	Negative	327.07	207.03	328.0794	C14H16O9	[M-H]-	Phenolic acids	477-90-7
Paeonol	Positive	167.07	121.07	166.063	C9H10O3	[M+H]+	Phenolic acids	552-41-0
D-Malic acid*	Negative	133.01	71.01	134.0215	C4H6O5	[M-H]-	Organic acids	636-61-3
Anisic acid; 4-Methoxybenzoic acid	Positive	153.05	109.06	152.0473	C8H8O3	[M+H]+	Phenolic acids	100-09-4
L-Tyrosine methyl ester	Positive	196.1	91.05	195.0895	C10H13NO3	[M+H]+	Amino acids and derivatives	1080-06-4
3-Chloroaniline	Positive	128.03	93.06	127.0189	C6H6ClN	[M+H]+	Alkaloids	108-42-9
Cyclohexylamine	Positive	100.11	55.05	99.1048	C6H13N	[M+H]+	Alkaloids	108-91-8
Ethylparaben	Negative	165.06	92.03	166.063	C9H10O3	[M-H]-	Phenolic acids	120-47-8
Phenyl acetate	Negative	135.05	92.03	136.0524	C8H8O2	[M-H]-	Phenolic acids	122-79-2
4-Methoxybenzaldehyde	Positive	137.06	94.04	136.0524	C8H8O2	[M+H]+	Others	123-11-5
4-Aminophenol	Positive	110.06	65.04	109.0528	C6H7NO	[M+H]+	Alkaloids	123-30-8
Undecanedioic acid	Negative	215.13	153.13	216.1362	C11H20O4	[M-H]-	Lipids	1852-04-6
DL-Leucine*	Positive	132.1	86.1	131.0946	C6H13NO2	[M+H]+	Amino acids and derivatives	328-39-2
Asn-Ile	Positive	246.15	166.09	245.1376	C10H19N3O4	[M+H]+	Amino acids and derivatives	438533-59-6
Lys-Gly	Positive	204.13	84.08	203.127	C8H17N3O3	[M+H]+	Amino acids and derivatives	7563-03-3
Ile-Asn	Positive	246.15	86.1	245.1376	C10H19N3O4	[M+H]+	Amino acids and derivatives	59652-59-4
Leu-Asp	Positive	247.13	86.1	246.1216	C10H18N2O5	[M+H]+	Amino acids and derivatives	32949-40-9
Gln-Gly	Positive	204.1	84.04	203.0906	C7H13N3O4	[M+H]+	Amino acids and derivatives	2650-65-9
Asn-Leu	Positive	246.14	141.1	245.1376	C10H19N3O4	[M+H]+	Amino acids and derivatives	22601-71-4
Luteolin-3'-O-glucoside	Positive	449.11	287.06	448.1006	C21H20O11	[M+H]+	Flavonoids	5154-41-6
Phe-Ser	Positive	253.12	120.09	252.111	C12H16N2O4	[M+H]+	Amino acids and derivatives	16053-39-7
Met-Met	Positive	281.1	104.05	280.0915	C10H20N2O3S2	[M+H]+	Amino acids and derivatives	7349-78-2
Prunasin	Positive	296.113	85.0281	295.1056	C14H17NO6	[M+H]+	Alkaloids	99-18-3
Dihydroferulic Acid	Negative	195.07	136.05	196.0736	C10H12O4	[M-H]-	Phenolic acids	1135-23-5
Barbituric acid;Malonylurea;2,4,6-Pyrimidinetrione	Positive	129.03	69	128.0222	C4H4N2O3	[M+H]+	Nucleotides and derivatives	67-52-7
2-Methoxy-4-methylphenol	Positive	139.08	77.04	138.0681	C8H10O2	[M+H]+	Phenolic acids	93-51-6
4-Methylbenzoic acid	Positive	137.06	77.04	136.0524	C8H8O2	[M+H]+	Phenolic acids	99-94-5
D-Pinitol*	Negative	193.07	59.01	194.079	C7H14O6	[M-H]-	Others	10284-63-6
Cryptochlorogenic acid (4-O-Caffeoylquinic acid)*	Negative	353.09	191.06	354.0951	C16H18O9	[M-H]-	Phenolic acids	905-99-7
Caffeic acid	Negative	179.03	135.05	180.0423	C9H8O4	[M-H]-	Phenolic acids	331-39-5
Cinnamic acid	Negative	147.05	103.06	148.0524	C9H8O2	[M-H]-	Phenolic acids	140-10-3
Caffeine	Positive	195.09	83.06	194.0804	C8H10N4O2	[M+H]+	Alkaloids	58-08-2
Gallocatechin 3-O-gallate*	Negative	457.08	169.01	458.0849	C22H18O11	[M-H]-	Flavonoids	5127-64-0
Tyrosol; 4-Hydroxyphenylethanol	Negative	137.06	119.05	138.0681	C8H10O2	[M-H]-	Phenolic acids	501-94-0
13-methylmyristic acid	Negative	241.22	241.21	242.2246	C15H30O2	[M-H]-	Lipids	2485-71-4
N-Acetyl-D-galactosamine	Positive	222.1	84.05	221.0899	C8H15NO6	[M+H]+	Others	1811-31-0
N-Methyl-4-aminobutyric acid	Positive	118.09	87.05	117.079	C5H11NO2	[M+H]+	Organic acids	1119-48-8
8-Azaguanine	Positive	153.05	136.03	152.0447	C4H4N6O	[M+H]+	Nucleotides and derivatives	134-58-7
N-Acetylcadaverine	Positive	145.13	86.1	144.1263	C7H16N2O	[M+H]+	Alkaloids	32343-73-0
3-Hydroxyglutaric acid	Negative	147.03	85.03	148.0372	C5H8O5	[M-H]-	Organic acids	638-18-6
10-Hydroxy-2-Decenoic Acid	Negative	185.12	139.11	186.1256	C10H18O3	[M-H]-	Lipids	14113-05-4
3-Methoxybenzoic acid	Negative	151.04	107.05	152.0473	C8H8O3	[M-H]-	Phenolic acids	586-38-9
1-Aminocyclopropane-1-carboxylic acid	Positive	102.06	56.05	101.0477	C4H7NO2	[M+H]+	Organic acids	22059-21-8
Oxiglutatione	Negative	611.14	306.08	612.152	C20H32N6O12S2	[M-H]-	Amino acids and derivatives	27025-41-8
D-Glucose*	Negative	179.06	59.01	180.0634	C6H12O6	[M-H]-	Others	50-99-7
N-Acetyl-D-mannosamine	Positive	222.1	138.05	221.0899	C8H15NO6	[M+H]+	Others	7772-94-3
L-Alanyl-L-Phenylalanine	Positive	237.12	120.09	236.1161	C12H16N2O3	[M+H]+	Amino acids and derivatives	3061-90-3
Glycylphenylalanine*	Positive	223.11	120.08	222.1004	C11H14N2O3	[M+H]+	Amino acids and derivatives	3321-03-7
Erythrose	Negative	119.04	59.01	120.0423	C4H8O4	[M-H]-	Others	583-50-6
Pyroglutamic acid	Positive	130.05	84.05	129.0426	C5H7NO3	[M+H]+	Amino acids and derivatives	4042-36-8
4-Methylhippuric Acid	Negative	192.07	148.08	193.0739	C10H11NO3	[M-H]-	Amino acids and derivatives	27115-50-0
6-O-methylguanine	Positive	166.07	124.05	165.0651	C6H7N5O	[M+H]+	Nucleotides and derivatives	20535-83-5
D-Ornithine	Positive	133.1	70.07	132.0899	C5H12N2O2	[M+H]+	Amino acids and derivatives	348-66-3
2-Benzoxazolinone	Positive	136.04	80.06	135.032	C7H5NO2	[M+H]+	Alkaloids	59-49-4
L-Leucyl-L-phenylalanine	Positive	279.17	120.08	278.163	C15H22N2O3	[M+H]+	Amino acids and derivatives	56217-82-4
Isomaltulose*	Negative	341.109	89.0249	342.1162	C12H22O11	[M-H]-	Others	13718-94-0
L-Glycyl-L-isoleucine	Positive	189.12	86.1	188.1161	C8H16N2O3	[M+H]+	Amino acids and derivatives	19461-38-2
L-Glycyl-L-phenylalanine*	Positive	223.11	120.09	222.1004	C11H14N2O3	[M+H]+	Amino acids and derivatives	721-66-4
Flavin Single Nucleotide(FMN)	Negative	455.1	96.97	456.1046	C17H21N4O9P	[M-H]-	Nucleotides and derivatives	6184-17-4
N,N'-Dimethylarginine;SDMA*	Positive	203.15	70.07	202.143	C8H18N4O2	[M+H]+	Amino acids and derivatives	30344-00-4
4-Hydroxyphenyllactic Acid*	Negative	181.05	135.04	182.0579	C9H10O4	[M-H]-	Phenolic acids	306-23-0
Tridecanedioic acid	Negative	243.16	181.16	244.1675	C13H24O4	[M-H]-	Lipids	505-52-2
Scopoletin (7-Hydroxy-6-methoxycoumarin)	Positive	193.05	133.03	192.0423	C10H8O4	[M+H]+	Lignans and Coumarins	92-61-5
4-hydroxyphenyl acrylaldehyde	Positive	165.05	119.05	164.0473	C9H8O3	[M+H]+	Others	-
5-O-Caffeoylshikimic acid	Negative	335.08	135.05	336.0845	C16H16O8	[M-H]-	Phenolic acids	73263-62-4
Epigallocatechin-3-O-gallate*	Negative	457.078	169.014	458.0849	C22H18O11	[M-H]-	Flavonoids	989-51-5
Methylsalicylate-2-O-glucoside	Negative	313.1	151.04	314.1002	C14H18O8	[M-H]-	Phenolic acids	10019-60-0
Glucosyringic acid	Negative	359.1	197.05	360.1056	C15H20O10	[M-H]-	Phenolic acids	33228-65-8
(1S,3S)-1-Methyl-1,2,3,4-tetrahydro-β-carboline-3-carboxylic acid	Positive	231.11	158.1	230.1055	C13H14N2O2	[M+H]+	Alkaloids	40678-46-4
Adenine	Positive	136.06	119.04	135.0545	C5H5N5	[M+H]+	Nucleotides and derivatives	73-24-5
Ferulic β-glucoside	Negative	355.1	193.05	356.1107	C16H20O9	[M-H]-	Phenolic acids	14364-12-6
Naringenin (5,7,4'-Trihydroxyflavanone)	Positive	273.08	153.02	272.0685	C15H12O5	[M+H]+	Flavonoids	480-41-1
Hesperetin-7-O-neohesperidoside(Neohesperidin)	Positive	611.2	303.09	610.1898	C28H34O15	[M+H]+	Flavonoids	13241-33-3
Quercetin-3-O-glucoside (Isoquercitrin)*	Positive	465.1	303.05	464.0955	C21H20O12	[M+H]+	Flavonoids	482-35-9
Kaempferol-3-O-neohesperidoside*	Positive	595.16	287.06	594.1585	C27H30O15	[M+H]+	Flavonoids	32602-81-6
Isorhamnetin-3-O-neohesperidoside*	Positive	625.17	317.07	624.169	C28H32O16	[M+H]+	Flavonoids	55033-90-4
Quercetin-3-O-rutinoside (Rutin)*	Positive	611.16	303.05	610.1534	C27H30O16	[M+H]+	Flavonoids	153-18-4
Luteolin-7-O-neohesperidoside (Lonicerin)*	Positive	595.17	287.06	594.1585	C27H30O15	[M+H]+	Flavonoids	25694-72-8
Luteolin-7-O-glucoside (Cynaroside)*	Positive	449.11	287.06	448.1006	C21H20O11	[M+H]+	Flavonoids	5373-11-5
Kaempferol-3-O-glucoside (Astragalin)*	Positive	449.11	287.06	448.1006	C21H20O11	[M+H]+	Flavonoids	480-10-4
Quercetin-3-O-sophoroside (Baimaside)	Positive	627.16	303.06	626.1483	C27H30O17	[M+H]+	Flavonoids	18609-17-1
5-Acetylsalicylic acid	Positive	181.05	107.05	180.0423	C9H8O4	[M+H]+	Phenolic acids	13110-96-8
Nicotinic Acid Methyl Ester(Methyl Nicotinate)	Positive	138.05	78.03	137.0477	C7H7NO2	[M+H]+	Alkaloids	93-60-7
Scopoletin-7-O-glucoside (Scopolin)	Positive	355.1	193.05	354.0951	C16H18O9	[M+H]+	Lignans and Coumarins	531-44-2
Isonicotinic acid	Positive	124.04	80.05	123.032	C6H5NO2	[M+H]+	Others	55-22-1
Isovanillin	Positive	153.05	65.04	152.0473	C8H8O3	[M+H]+	Others	621-59-0
Butylphthalide	Positive	191.1	145.1	190.0994	C12H14O2	[M+H]+	Others	6066-49-5
DL-Tryptophan	Positive	205.09	146.06	204.0899	C11H12N2O2	[M+H]+	Amino acids and derivatives	54-12-6
Imidazole-4-Acetic Acid*	Positive	127.05	81.04	126.0429	C5H6N2O2	[M+H]+	Alkaloids	645-65-8
6,7-Dihydroxy-4-methylcoumarin	Positive	193.05	147.04	192.0423	C10H8O4	[M+H]+	Lignans and Coumarins	529-84-0
4-Hydroxy-L-Isoleucine	Positive	148.09	74.02	147.0895	C6H13NO3	[M+H]+	Amino acids and derivatives	781658-23-9
L-Xylose*	Negative	149.05	59.02	150.0528	C5H10O5	[M-H]-	Others	609-06-3
5,7-Dihydroxy-4-methylcoumarin	Positive	193.05	91.05	192.0423	C10H8O4	[M+H]+	Lignans and Coumarins	2107-76-8
3,4-Dimethoxybenzoic acid; Veratric acid	Positive	183.06	165.05	182.0579	C9H10O4	[M+H]+	Phenolic acids	93-07-2
N-Benzoyl-(2R,3S)-3-phenylisoserine	Positive	286.1	105.03	285.1001	C16H15NO4	[M+H]+	Amino acids and derivatives	132201-33-3
Decursinol	Positive	247.09	229.09	246.0892	C14H14O4	[M+H]+	Lignans and Coumarins	23458-02-8
1-Arabinosyluracil	Positive	245.07	113.03	244.0695	C9H12N2O6	[M+H]+	Nucleotides and derivatives	3083-77-0
Oxindole	Positive	134.06	106.07	133.0528	C8H7NO	[M+H]+	Alkaloids	59-48-3
3,4-Dimethoxycinnamic acid	Positive	209.08	191.07	208.0736	C11H12O4	[M+H]+	Phenolic acids	2316-26-9
Crotonoside; 2-Hydroxyadenosine	Positive	284.1	152.06	283.0917	C10H13N5O5	[M+H]+	Nucleotides and derivatives	1818-71-9
Butyl isobutyl phthalate*	Positive	279.16	149.03	278.1518	C16H22O4	[M+H]+	Phenolic acids	17851-53-5
Laurocapram	Positive	282.28	114.09	281.2719	C18H35NO	[M+H]+	Alkaloids	59227-89-3
2,5-Dihydroxyacetophenone	Negative	151.04	108.02	152.0473	C8H8O3	[M-H]-	Others	490-78-8
2,3,19-Trihydroxyurs-12-en-28-oic acid (Tormentic acid)	Negative	487.34	469.33	488.3502	C30H48O5	[M-H]-	Terpenoids	13850-16-3
3,4-Dihydrocoumarin	Negative	147.05	119.05	148.0524	C9H8O2	[M-H]-	Lignans and Coumarins	119-84-6
Cimifugin-7-O-glucoside	Positive	469.17	307.12	468.1632	C22H28O11	[M+H]+	Others	80681-45-4
Imidazol-1-yl-acetic acid*	Positive	127.05	81.04	126.0429	C5H6N2O2	[M+H]+	Alkaloids	22884-10-2
Vanillic acid methyl ester	Negative	181.05	107.01	182.0579	C9H10O4	[M-H]-	Phenolic acids	3943-74-6
2-Piperidone	Positive	100.08	56.05	99.0684	C5H9NO	[M+H]+	Alkaloids	675-20-7
L-Azetidine-2-carboxylic acid	Positive	102.05	56.05	101.0477	C4H7NO2	[M+H]+	Alkaloids	2133-34-8
4-Hydroxyacetophenone	Negative	135.05	92.03	136.0524	C8H8O2	[M-H]-	Others	99-93-4
Manninotriose	Negative	503.16	383.12	504.169	C18H32O16	[M-H]-	Others	13382-86-0
Protocatechuic Acid Methyl Ester	Negative	167.04	108.02	168.0423	C8H8O4	[M-H]-	Phenolic acids	2150-43-8
Veratraldehyde	Positive	167.07	124.05	166.063	C9H10O3	[M+H]+	Phenolic acids	120-14-9
Betaine	Positive	118.09	58.07	117.079	C5H11NO2	[M+H]+	Alkaloids	107-43-7
1-Monomyristin	Positive	303.25	57.07	302.2457	C17H34O4	[M+H]+	Lipids	589-68-4
2'-Aminoacetophenone	Positive	136.08	91.06	135.0684	C8H9NO	[M+H]+	Others	551-93-9
L-Glucose*	Negative	179.056	59.0141	180.0634	C6H12O6	[M-H]-	Others	921-60-8
Piperonylic acid	Negative	165.02	91.02	166.0266	C8H6O4	[M-H]-	Organic acids	94-53-1
L-Tyramine	Positive	138.09	77.04	137.0841	C8H11NO	[M+H]+	Alkaloids	51-67-2
Methyl 3-aminopropanoate	Positive	104.07	59.01	103.0633	C4H9NO2	[M+H]+	Amino acids and derivatives	4138-35-6
2,6-Dimethoxybenzoic acid	Positive	183.06	165.06	182.0579	C9H10O4	[M+H]+	Phenolic acids	1466-76-8
Maltopentaose	Positive	829.28	325.11	828.2747	C30H52O26	[M+H]+	Others	34620-76-3
L-Aspartic acid	Positive	134.04	74.02	133.0375	C4H7NO4	[M+H]+	Amino acids and derivatives	56-84-8
Vanillin acetate	Positive	195.06	93.03	194.0579	C10H10O4	[M+H]+	Phenolic acids	881-68-5
Methyl anisate	Positive	167.07	135.04	166.063	C9H10O3	[M+H]+	Phenolic acids	121-98-2
Phylloquinone (Vitamin K1)	Positive	451.36	89.06	450.3498	C31H46O2	[M+H]+	Others	84-80-0
D-Arabinose*	Negative	149.05	59.01	150.0528	C5H10O5	[M-H]-	Others	10323-20-3
5-Hydroxy-DL-tryptophan(5-HTP)	Positive	221.09	130.06	220.0848	C11H12N2O3	[M+H]+	Amino acids and derivatives	56-69-9
Ethyl Vanillate	Positive	197.08	65.04	196.0736	C10H12O4	[M+H]+	Phenolic acids	617-05-0
3-Hydroxy-4-methoxybenzoic acid; Isovanillic Acid	Positive	169.05	65.04	168.0423	C8H8O4	[M+H]+	Phenolic acids	645-08-9
Valpromide	Positive	144.14	57.07	143.131	C8H17NO	[M+H]+	Alkaloids	2430-27-5
10-Hydroxydecanoic acid	Negative	187.13	141.13	188.1412	C10H20O3	[M-H]-	Lipids	1679-53-4
Dimethyl phthalate	Positive	195.06	163.04	194.0579	C10H10O4	[M+H]+	Phenolic acids	131-11-3
Diphenylamine	Positive	170.1	93.06	169.0891	C12H11N	[M+H]+	Alkaloids	122-39-4
6-Chloropurine	Positive	155.01	119.04	154.0046	C5H3ClN4	[M+H]+	Nucleotides and derivatives	87-42-3
2-Phenylethylamine	Positive	122.1	105.07	121.0891	C8H11N	[M+H]+	Alkaloids	156-28-5
O-Acetyl-L-carnitine	Positive	204.13	85.03	203.1158	C9H17NO4	[M+H]+	Alkaloids	3040-38-8
Hexadecanedioic acid	Negative	285.21	223.21	286.2144	C16H30O4	[M-H]-	Lipids	505-54-4
1,14-Tetradecanedioic Acid	Negative	257.18	195.18	258.1831	C14H26O4	[M-H]-	Lipids	821-38-5
Rutin Trihydrate	Positive	611.16	303.06	664.1851	C27H36O19	[M-3H2O+H]+	Flavonoids	207671-50-9
Nodakenin	Negative	407.13	227.07	408.142	C20H24O9	[M-H]-	Lignans and Coumarins	495-31-8
Kaurenoic Acid*	Negative	301.22	301.22	302.2246	C20H30O2	[M-H]-	Terpenoids	6730-83-2
Sibiricose A5*	Negative	517.16	175.04	518.1636	C22H30O14	[M-H]-	Phenolic acids	107912-97-0
Allitol	Negative	181.07	59.01	182.079	C6H14O6	[M-H]-	Others	488-44-8
Didymin (Isosakuranetin-7-O-rutinoside)*	Negative	593.19	285.08	594.1949	C28H34O14	[M-H]-	Flavonoids	14259-47-3
Pterolactam*	Positive	116.07	70.07	115.0633	C5H9NO2	[M+H]+	Alkaloids	38072-88-7
N-(2-Hydroxy-4-methoxyphenyl)acetamide	Positive	182.08	91.05	181.0739	C9H11NO3	[M+H]+	Alkaloids	58469-06-0
Octahydroisoindole	Positive	126.13	67.06	125.1204	C8H15N	[M+H]+	Alkaloids	21850-12-4
Choline	Positive	104.11	60.08	104.107	C5H14NO+	[M]+	Alkaloids	62-49-7
Agmatine	Positive	131.13	114.1	130.1218	C5H14N4	[M+H]+	Alkaloids	306-60-5
Nicotinic acid adenine dinucleotide	Positive	664.12	136.06	663.1091	C21H27N7O14P2	[M+H]+	Nucleotides and derivatives	53-84-9
Inosine 5'-monophosphate	Positive	349.05	137.05	348.0471	C10H13N4O8P	[M+H]+	Nucleotides and derivatives	131-99-7
LysoPC 16:0	Positive	496.34	184.07	495.3325	C24H50NO7P	[M+H]+	Lipids	17364-16-8
LysoPE 16:0	Positive	454.29	313.27	453.2855	C21H44NO7P	[M+H]+	Lipids	53862-35-4
Thiamine (Vitamin B1)	Positive	265.11	122.07	265.1118	C12H17N4OS+	[M]+	Others	70-16-6
Adenosine 5'-monophosphate	Positive	348.07	136.06	347.0631	C10H14N5O7P	[M+H]+	Nucleotides and derivatives	61-19-8
Guanosine 5'-monophosphate	Positive	364.07	152.06	363.058	C10H14N5O8P	[M+H]+	Nucleotides and derivatives	85-32-5
O-Phosphocholine	Positive	184.07	125	184.0733	C5H15NO4P+	[M]+	Alkaloids	107-73-3
Dodecanoic acid (Lauric acid)	Negative	199.17	199.17	200.1776	C12H24O2	[M-H]-	Lipids	143-07-7
LysoPC 14:0	Positive	468.31	184.07	467.3012	C22H46NO7P	[M+H]+	Lipids	20559-16-4
LysoPC 16:0(2n isomer)	Positive	496.34	184.07	495.3325	C24H50NO7P	[M+H]+	Lipids	-
LysoPE 16:0(2n isomer)	Positive	454.29	313.27	453.2855	C21H44NO7P	[M+H]+	Lipids	-
L-Proline	Positive	116.07	70.07	115.0633	C5H9NO2	[M+H]+	Amino acids and derivatives	147-85-3
L-Citrulline	Positive	176.1	113.07	175.0957	C6H13N3O3	[M+H]+	Amino acids and derivatives	372-75-8
L-Serine	Positive	106.05	70.03	105.0426	C3H7NO3	[M+H]+	Amino acids and derivatives	56-45-1
L-Glutamic acid	Positive	148.06	84.04	147.0532	C5H9NO4	[M+H]+	Amino acids and derivatives	56-86-0
L-Phenylalanine	Positive	166.09	120.08	165.079	C9H11NO2	[M+H]+	Amino acids and derivatives	63-91-2
L-Lysine	Positive	147.11	84.08	146.1055	C6H14N2O2	[M+H]+	Amino acids and derivatives	56-87-1
Hypoxanthine	Positive	137.05	119.04	136.0385	C5H4N4O	[M+H]+	Nucleotides and derivatives	68-94-0
N-Acetyl-L-glutamic acid	Negative	188.06	128.04	189.0637	C7H11NO5	[M-H]-	Amino acids and derivatives	1188-37-0
L-Carnosine	Positive	227.11	156.08	226.1066	C9H14N4O3	[M+H]+	Amino acids and derivatives	305-84-0
5-Aminovaleric acid	Positive	118.09	101.06	117.079	C5H11NO2	[M+H]+	Organic acids	660-88-8
N6-Acetyl-L-lysine	Positive	189.12	126.09	188.1161	C8H16N2O3	[M+H]+	Amino acids and derivatives	692-04-6
N-Acetyl-L-Glutamine	Negative	187.07	125.07	188.0797	C7H12N2O4	[M-H]-	Amino acids and derivatives	2490-97-3
Isoguanine	Positive	152.06	135.03	151.0494	C5H5N5O	[M+H]+	Nucleotides and derivatives	3373-53-3
L-Glutamine	Positive	147.08	84.04	146.0691	C5H10N2O3	[M+H]+	Amino acids and derivatives	56-85-9
Adenosine*	Positive	268.1	136.06	267.0968	C10H13N5O4	[M+H]+	Nucleotides and derivatives	58-61-7
Benzoic acid	Positive	123.04	79.05	122.0368	C7H6O2	[M+H]+	Phenolic acids	65-85-0
Glutaric acid*	Negative	131.035	87.0452	132.0423	C5H8O4	[M-H]-	Organic acids	110-94-1
Xanthine	Negative	151.03	108.02	152.0334	C5H4N4O2	[M-H]-	Nucleotides and derivatives	69-89-6
Thymidine	Positive	243.1	127.05	242.0903	C10H14N2O5	[M+H]+	Nucleotides and derivatives	50-89-5
Sebacic acid	Negative	201.11	139.11	202.1205	C10H18O4	[M-H]-	Organic acids	111-20-6
6-Aminocaproic acid	Positive	132.1	69.07	131.0946	C6H13NO2	[M+H]+	Organic acids	60-32-2
Terephthalic acid	Negative	165.02	121.03	166.0266	C8H6O4	[M-H]-	Phenolic acids	100-21-0
Isoferulic Acid*	Negative	193.051	134.037	194.0579	C10H10O4	[M-H]-	Phenolic acids	25522-33-2
Nicotinic acid (Vitamin B3)	Positive	124.04	78.03	123.032	C6H5NO2	[M+H]+	Others	59-67-6
Inositol	Negative	179.06	87.01	180.0634	C6H12O6	[M-H]-	Others	87-89-8
Inosine	Positive	269.09	137.05	268.0808	C10H12N4O5	[M+H]+	Nucleotides and derivatives	58-63-9
Guanosine	Positive	284.1	152.06	283.0917	C10H13N5O5	[M+H]+	Nucleotides and derivatives	118-00-3
2'-Deoxyguanosine	Positive	268.1	152.06	267.0968	C10H13N5O4	[M+H]+	Nucleotides and derivatives	961-07-9
L-Methionine	Positive	150.06	61.01	149.051	C5H11NO2S	[M+H]+	Amino acids and derivatives	63-68-3
D-Panthenol	Positive	206.14	76.08	205.1314	C9H19NO4	[M+H]+	Others	81-13-0
S-(5'-Adenosy)-L-homocysteine	Positive	385.13	250	384.1216	C14H20N6O5S	[M+H]+	Amino acids and derivatives	979-92-0
Pyridoxine	Positive	170.08	134.06	169.0739	C8H11NO3	[M+H]+	Others	65-23-6
p-Coumaric acid	Positive	165.05	119.05	164.0473	C9H8O3	[M+H]+	Phenolic acids	501-98-4
5'-Deoxy-5'-(methylthio)adenosine	Positive	298.1	136.06	297.0896	C11H15N5O3S	[M+H]+	Nucleotides and derivatives	2457-80-9
Hesperetin-5-O-glucoside	Negative	463.12	301.07	464.1319	C22H24O11	[M-H]-	Flavonoids	69651-80-5
Isohemiphloin	Negative	433.11	313.07	434.1213	C21H22O10	[M-H]-	Flavonoids	3682-02-8
3-Carbamyl-1-methylpyridinium;(1-Methylnicotinamide)	Positive	138.08	94.07	137.0715	C7H9N2O	[M+H]+	Alkaloids	1005-24-9
Neochlorogenic acid (5-O-Caffeoylquinic acid)*	Negative	353.09	191.06	354.0951	C16H18O9	[M-H]-	Phenolic acids	906-33-2
D-Threitol	Negative	121.05	59.01	122.0579	C4H10O4	[M-H]-	Others	2418-52-2
Orotic acid (Vitamin B13)	Negative	155.01	111.02	156.0171	C5H4N2O4	[M-H]-	Others	65-86-1
Dulcitol*	Negative	181.07	101.02	182.079	C6H14O6	[M-H]-	Others	608-66-2
Trigonelline	Positive	138.06	94.07	137.0477	C7H7NO2	[M+H]+	Alkaloids	535-83-1
Mandelic acid	Negative	151.04	107.05	152.0473	C8H8O3	[M-H]-	Organic acids	90-64-2
α-Ketoglutaric acid	Negative	145.01	101.02	146.0215	C5H6O5	[M-H]-	Organic acids	328-50-7
Diethanolamine	Positive	106.09	88.08	105.079	C4H11NO2	[M+H]+	Alkaloids	111-42-2
L-Ornithine	Positive	133.1	116.07	132.0899	C5H12N2O2	[M+H]+	Amino acids and derivatives	70-26-8
1,5-Anhydro-D-glucitol	Negative	163.06	101.02	164.0685	C6H12O5	[M-H]-	Others	154-58-5
N-Acetyl-L-Aspartic Acid	Negative	174.04	88.04	175.0481	C6H9NO5	[M-H]-	Amino acids and derivatives	997-55-7
L-Methionine Sulfoxide	Positive	166.05	102.06	165.046	C5H11NO3S	[M+H]+	Amino acids and derivatives	3226-65-1
N-Acetylputrescine	Positive	131.12	114.09	130.1106	C6H14N2O	[M+H]+	Alkaloids	18233-70-0
N-Phenylacetylglycine	Positive	194.08	91.05	193.0739	C10H11NO3	[M+H]+	Amino acids and derivatives	500-98-1
N-Acetyl-D-glucosamine	Positive	222.1	138.05	221.0899	C8H15NO6	[M+H]+	Others	7512-17-6
Palmitaldehyde	Negative	239.24	223.24	240.2453	C16H32O	[M-H]-	Lipids	629-80-1
4-Nitrophenol	Positive	140.03	98.96	139.0269	C6H5NO3	[M+H]+	Phenolic acids	100-02-7
L-Homocystine	Positive	269.06	136.04	268.0551	C8H16N2O4S2	[M+H]+	Amino acids and derivatives	626-72-2
3-Hydroxy-3-methylpentane-1,5-dioic acid	Negative	161.05	99.05	162.0528	C6H10O5	[M-H]-	Amino acids and derivatives	503-49-1
Quercetin	Positive	303.05	137.02	302.0427	C15H10O7	[M+H]+	Flavonoids	117-39-5
Uridine 5'-diphosphate	Negative	402.99	158.93	404.0022	C9H14N2O12P2	[M-H]-	Nucleotides and derivatives	27821-45-0
trans-Aconitic acid	Positive	175.02	98.98	174.0164	C6H6O6	[M+H]+	Organic acids	4023-65-8
γ-Aminobutyric acid	Positive	104.07	69.03	103.0633	C4H9NO2	[M+H]+	Organic acids	56-12-2
2-Aminoisobutyric acid	Positive	104.07	58.07	103.0633	C4H9NO2	[M+H]+	Organic acids	62-57-7
N,N-Dimethylglycine*	Positive	104.07	58.07	103.0633	C4H9NO2	[M+H]+	Amino acids and derivatives	1118-68-9
Ethylmalonic acid*	Negative	131.03	87.05	132.0423	C5H8O4	[M-H]-	Organic acids	601-75-2
2-(Formylamino)benzoic acid	Negative	164.04	120.05	165.0426	C8H7NO3	[M-H]-	Phenolic acids	3342-77-6
Aminomalonic acid	Negative	118.01	74.02	119.0219	C3H5NO4	[M-H]-	Organic acids	1068-84-4
3-Hydroxyflavone	Positive	239.07	165.05	238.063	C15H10O3	[M+H]+	Flavonoids	577-85-5
2'-Deoxyadenosine-5'-monophosphate	Positive	332.08	136.06	331.0682	C10H14N5O6P	[M+H]+	Nucleotides and derivatives	653-63-4
Succinyladenosine	Positive	384.12	252.07	383.1077	C14H17N5O8	[M+H]+	Nucleotides and derivatives	4542-23-8
Homoarginine	Positive	189.13	144.1	188.1273	C7H16N4O2	[M+H]+	Amino acids and derivatives	156-86-5
Morin*	Negative	301.04	151	302.0427	C15H10O7	[M-H]-	Flavonoids	480-16-0
D-Glucoronic acid*	Negative	193.04	72.99	194.0427	C6H10O7	[M-H]-	Others	6556-12-3
Cytidine	Positive	244.09	112.05	243.0855	C9H13N3O5	[M+H]+	Nucleotides and derivatives	65-46-3
2'-Deoxyadenosine	Positive	252.11	136.06	251.1018	C10H13N5O3	[M+H]+	Nucleotides and derivatives	958-09-8
2-(Dimethylamino)guanosine*	Positive	312.13	180.09	311.123	C12H17N5O5	[M+H]+	Nucleotides and derivatives	2140-67-2
7-Methylguanine	Positive	166.07	149.05	165.0651	C6H7N5O	[M+H]+	Nucleotides and derivatives	578-76-7
9,19-Cyclolanost-24-en-3-ol (Cycloartenol)	Positive	427.39	345.32	426.3862	C30H50O	[M+H]+	Terpenoids	469-38-5
Oxalic acid	Negative	88.99	70.98	89.9953	C2H2O4	[M-H]-	Organic acids	144-62-7
D-Mannose*	Negative	179.06	59.01	180.0634	C6H12O6	[M-H]-	Others	3458-28-4
D-Galactose*	Negative	179.06	59.01	180.0634	C6H12O6	[M-H]-	Others	59-23-4
1-Decanol*	Negative	157.16	157.16	158.1671	C10H22O	[M-H]-	Others	112-30-1
2-Decanol*	Negative	157.16	157.16	158.1671	C10H22O	[M-H]-	Others	1120-06-5
1-Octadecanol	Negative	269.29	209.23	270.2923	C18H38O	[M-H]-	Lipids	112-92-5
1-Eicosanol	Negative	297.32	183.21	298.3236	C20H42O	[M-H]-	Lipids	629-96-9
2,6-Dimethyl-7-octene-2,3,6-triol	Negative	187.13	97.06	188.1412	C10H20O3	[M-H]-	Others	73815-21-1
4-MethoxycinnaMaldehyde	Positive	163.08	91.05	162.0681	C10H10O2	[M+H]+	Others	1963-36-6
Benzyl-(2''-O-xylosyl)glucoside*	Negative	401.14	269.1	402.1526	C18H26O10	[M-H]-	Phenolic acids	-
Levopimaric acid*	Negative	301.22	301.22	302.2246	C20H30O2	[M-H]-	Terpenoids	79-54-9
7R,8S-erythro-3',4,9,9'-tetrahydroxy-3-methoxy-8-O-4'-neolignan-7-O-glucopyr-anoside,	Negative	525.2	179.07	526.205	C25H34O12	[M-H]-	Lignans and Coumarins	-
(7S,8R-Threo-3',4,9'-trihydroxy-3-methoxy-4',7-epoxy-neolignan-9-O-rhamnoside	Positive	493.21	163.08	492.1995	C25H32O10	[M+H]+	Lignans and Coumarins	-
6'-O-caffeoylcatalpol	Negative	523.15	161.03	524.153	C24H28O13	[M-H]-	Others	-
alanine betaine	Positive	118.08	72.08	117.079	C5H11NO2	[M+H]+	Alkaloids	-
Sesuvioside C*	Positive	655.19	347.08	654.1796	C29H34O17	[M+H]+	Flavonoids	-
Syringetin-7-O-glucoside*	Positive	509.13	347.08	508.1217	C23H24O13	[M+H]+	Flavonoids	-
Kaempferol-3-O-sambubioside	Positive	581.15	287.06	580.1428	C26H28O15	[M+H]+	Flavonoids	27661-51-4
N-benzylformamide	Positive	136.07	91.05	135.0684	C8H9NO	[M+H]+	Alkaloids	6343-54-0
1-O-Sinapoyl-β-D-glucose	Negative	385.11	223.06	386.1213	C17H22O10	[M-H]-	Phenolic acids	-
Butin-7-O-glucoside	Negative	433.11	271.06	434.1213	C21H22O10	[M-H]-	Flavonoids	-
6'-O-Feruloyl-D-sucrose*	Negative	517.16	175.04	518.1636	C22H30O14	[M-H]-	Phenolic acids	118230-77-6
6'-O-Glucosylaucubin	Negative	507.17	179.05	508.1792	C21H32O14	[M-H]-	Terpenoids	-
Majoroside	Negative	387.13	225.07	388.1369	C17H24O10	[M-H]-	Terpenoids	134140-02-6
6-Hydroxyluteolin 5-glucoside*	Negative	463.09	301.03	464.0955	C21H20O12	[M-H]-	Flavonoids	-
Isorhamnetin-3-O-(6''-malonyl)glucoside-7-O-rhamnoside	Positive	711.17	317.06	710.1694	C31H34O19	[M+H]+	Flavonoids	-
Limocitrin-3-O-galactoside*	Positive	509.13	347.07	508.1217	C23H24O13	[M+H]+	Flavonoids	-
Limocitrin-3-O-glucoside	Positive	509.13	347.07	508.1217	C23H24O13	[M+H]+	Flavonoids	-
Limocitrin (5,7,4'-trihydroxy-8,3'-dimethoxyflavone)	Positive	347.07	332.05	346.0689	C17H14O8	[M+H]+	Flavonoids	489-33-8
Protocatechualdehyde*	Negative	137.02	93.04	138.0317	C7H6O3	[M-H]-	Others	139-85-5
Patuletin-3-O-gentiobioside	Positive	657.17	333.06	656.1589	C28H32O18	[M+H]+	Flavonoids	-
Patuletin-3-O-rutinoside	Positive	641.17	317.06	640.1639	C28H32O17	[M+H]+	Flavonoids	-
3,3',5,7-Tetrahydroxy-4',6-Dimethoxyflavone-7-O-Gentiobioside; (Laciniatin-7-O-Gentiobioside)	Positive	671.18	347.07	670.1745	C29H34O18	[M+H]+	Flavonoids	-
Nepetin-7-O-alloside*	Positive	479.12	317.06	478.1111	C22H22O12	[M+H]+	Flavonoids	-
3-amino-2-naphthoic acid*	Positive	188.07	118.06	187.0633	C11H9NO2	[M+H]+	Alkaloids	-
Phenylpropionic acid-O-β-D-glucopyranoside	Negative	325.09	119.05	326.1002	C15H18O8	[M-H]-	Phenolic acids	-
2'-O-Methyladenosine	Positive	282.12	136.06	281.1124	C11H15N5O4	[M+H]+	Nucleotides and derivatives	2140-79-6
Cryptomeridiol	Negative	239.2	223.02	240.2089	C15H28O2	[M-H]-	Terpenoids	4666-84-6
Vanillylamine	Positive	154.09	137.06	153.079	C8H11NO2	[M+H]+	Alkaloids	1196-92-5
Ferulic acid-4-O-glucoside	Negative	355.1	193.05	356.1107	C16H20O9	[M-H]-	Phenolic acids	117405-51-3
Luteolin-7-O-gentiobioside	Positive	611.16	287.05	610.1534	C27H30O16	[M+H]+	Flavonoids	-
Luteolin-4'-O-glucoside*	Positive	449.11	287.05	448.1006	C21H20O11	[M+H]+	Flavonoids	6920-38-3
5,7,3',4',5'-Pentahydroxydihydroflavone	Negative	303.05	151.03	304.0583	C15H12O7	[M-H]-	Flavonoids	-
Planteose	Positive	505.18	127.03	504.169	C18H32O16	[M+H]+	Others	470-57-5
Demethyl coniferin	Negative	327.11	165.05	328.1158	C15H20O8	[M-H]-	Phenolic acids	-
L-Cyclopentylglycine	Positive	144.1	98.09	143.0946	C7H13NO2	[M+H]+	Amino acids and derivatives	2521-84-8
3,7-Dihydroxychromen-4-one	Positive	179.03	77.04	178.0266	C9H6O4	[M+H]+	Others	-
5-(2-Hydroxyethyl)-2-O-glucosylphenol*	Negative	315.11	153.06	316.1158	C14H20O8	[M-H]-	Phenolic acids	-
Methyl 2,4-dihydroxyphenylacetate*	Negative	181.05	135.04	182.0579	C9H10O4	[M-H]-	Phenolic acids	67828-42-6
4,5,6-Trihydroxy-2-cyclohexen-1-ylideneacetonitrile	Positive	168.07	105.03	167.0582	C8H9NO3	[M+H]+	Alkaloids	-
Pedaliin*	Positive	479.12	317.08	478.1111	C22H22O12	[M+H]+	Flavonoids	22860-72-6
3,4-Secodammara-4(28),20,24-trien-3,26-dioic acid	Positive	471.35	407.33	470.3396	C30H46O4	[M+H]+	Terpenoids	-
7-hydroxy-2H-1-benzopyran-2-one	Positive	163.04	89.04	162.0317	C9H6O3	[M+H]+	Lignans and Coumarins	-
dihydro-4-hydroxy-5-hydroxymethyl-2(3H)-furanone	Positive	133.05	69.04	132.0423	C5H8O4	[M+H]+	Others	-
aesculetine	Positive	179.03	123.04	178.0266	C9H6O4	[M+H]+	Lignans and Coumarins	-
3,4-methylenedioxy cinnamyl alcohol	Negative	177.06	117.04	178.063	C10H10O3	[M-H]-	Others	58095-76-4
Grevilloside G*	Negative	315.11	153.05	316.1158	C14H20O8	[M-H]-	Phenolic acids	791846-69-0
Caffeyl alcohol 4-O-β-D-glucopyranoside	Negative	327.11	147.05	328.1158	C15H20O8	[M-H]-	Phenolic acids	-
Benzyl β-primeveroside*	Negative	401.14	269.1	402.1526	C18H26O10	[M-H]-	Phenolic acids	-
Limocitrin malonyl glucoside	Positive	595.13	347.08	594.1221	C26H26O16	[M+H]+	Flavonoids	-
N-(3-hydroxy-4-methoxyphenethyl)-4-hydroxybutanamide	Positive	268.15	136.06	267.1471	C14H21NO4	[M+H]+	Alkaloids	-
3-quinolinecarboxylic acid	Positive	190.05	144.04	189.0426	C10H7NO3	[M+H]+	Alkaloids	-
7,3',4'-Trihydroxyquercetin glucoside	Positive	507.15	345.1	506.1424	C24H26O12	[M+H]+	Flavonoids	-
Pyran[3,4-b]indole-2-ketone	Positive	188.07	118.07	187.0633	C11H9O2N	[M+H]+	Alkaloids	-
3,5-Dihydro-2H-Furo[3,2-C]Quinolin-4-One*	Positive	188.07	118.07	187.0633	C11H9NO2	[M+H]+	Alkaloids	-
pithecellobiumol B	Positive	195.06	163.04	194.0579	C10H10O4	[M+H]+	Others	-
Furo(2,3-f)-1,3-bewnzodioxole	Positive	271.06	149.02	270.0528	C15H10O5	[M+H]+	Phenolic acids	-
Murrayacarpin A glucoside	Positive	369.12	177.05	368.1102	C17H20O9	[M+H]+	Lignans and Coumarins	-
Protocatechuic acid xylosyl xyloside	Negative	417.11	152.01	418.1111	C17H22O12	[M-H]-	Phenolic acids	-
2-β-D-Glucopyranosyloxy-5-hydroxyphenylacetic acidmethylester*	Negative	343.1	181.05	344.1107	C15H20O9	[M-H]-	Phenolic acids	-
Dihydrophaseic acid	Negative	281.14	171.12	282.1467	C15H22O5	[M-H]-	Terpenoids	41756-77-8
Bis(2-ethyl-hexyl)-phthalate	Positive	391.28	149.02	390.277	C24H38O4	[M+H]+	Phenolic acids	-
4-Methylazetidine-2-Carboxylic acid*	Positive	116.07	70.06	115.0633	C5H9NO2	[M+H]+	Alkaloids	1779725-63-1
1,4-Benzodioxin-6-propanol	Positive	193.09	105.07	192.0781	C11H12O3	[M+H]+	Others	-
6-Hydroxymellein	Positive	195.06	117.03	194.0574	C10H10O4	[M+H]+	Others	70901-60-9
Phaseic Acid	Negative	279.12	139.08	280.1311	C15H20O5	[M-H]-	Terpenoids	24394-14-7
Guaiacylglycerol-β-Guaiacyl Ether	Negative	319.12	241.05	320.126	C17H20O6	[M-H]-	Lignans and Coumarins	7382-59-4
Methoxy-erythro-Guaiacyl glycerol β-threo-syringyl glycerol ether	Negative	469.17	195.07	470.1788	C22H30O11	[M-H]-	Lignans and Coumarins	-
Erythro-Guaiacylglycerol-β-Coniferyl Ether	Negative	375.15	327.12	376.1522	C20H24O7	[M-H]-	Lignans and Coumarins	890317-92-7
Erythro-Guaiacylglycerol-β-Sinapyl Ether	Negative	405.15	165.06	406.1628	C21H26O8	[M-H]-	Lignans and Coumarins	877875-96-2
Divanillyltetrahydrofuran	Positive	345.17	137.06	344.1618	C20H24O5	[M+H]+	Lignans and Coumarins	-
3-ethyl-7-hydroxy-6-methoxyphthalide	Positive	209.08	121.06	208.0736	C11H12O4	[M+H]+	Others	-
Niga-ichigoside F3	Negative	707.4	485.33	708.4085	C38H60O12	[M-H]-	Terpenoids	-
Trachelosperonide B-1	Negative	681.383	501.326	682.3928	C36H58O12	[M-H]-	Terpenoids	-
3-Hydroxydecanedioic acid	Negative	217.11	59.01	218.1154	C10H18O5	[M-H]-	Organic acids	73141-46-5
Prolylproline	Positive	213.12	70.07	212.1161	C10H16N2O3	[M+H]+	Amino acids and derivatives	20488-28-2
Rubusine	Positive	190.05	128.05	189.0426	C10H7NO3	[M+H]+	Alkaloids	-
L-Glutaminyl-L-isoleucine	Positive	260.16	242.15	259.1532	C11H21N3O4	[M+H]+	Amino acids and derivatives	86416-45-7
2-oxindole-3-acetic acid	Positive	192.06	146.06	191.0582	C10H9NO3	[M+H]+	Alkaloids	2971-31-5
Leu-Pro	Positive	229.15	116.07	228.1474	C11H20N2O3	[M+H]+	Amino acids and derivatives	-
Ser-Gly-Phe	Positive	310.14	166.09	309.1325	C14H19N3O5	[M+H]+	Amino acids and derivatives	-
Thr-Trp	Positive	306.14	188.07	305.1376	C15H19N3O4	[M+H]+	Amino acids and derivatives	186761-42-2
Isoscopoletin-β-D-glucoside	Positive	355.1	163.04	354.0951	C16H18O9	[M+H]+	Lignans and Coumarins	20186-29-2
Mahuanin B	Positive	291.087	139.039	290.079	C15H14O6	[M+H]+	Others	-
3-Oxo-19-hydroxyurs-12-en-28-oic acid (Pomonic acid)*	Positive	471.346	205.157	470.3396	C30H46O4	[M+H]+	Terpenoids	13849-90-6
Myricatomentogenin	Positive	343.15	163.08	342.1467	C20H22O5	[M+H]+	Others	-
Hydroxydaphnoretin glucoside	Positive	531.11	369.06	530.106	C25H22O13	[M+H]+	Lignans and Coumarins	-
Hydroxycarvine	Positive	167.11	91.05	166.0994	C10H14O2	[M+H]+	Terpenoids	-
polygodial	Positive	235.17	179.11	234.162	C15H22O2	[M+H]+	Terpenoids	6754-20-7
19-Hydroxy-2-(hydroxymethyl)-A(1)-norursa-2,12-dien-28-oic acid (Coleonolic acid)*	Positive	471.35	205.16	470.3396	C30H46O4	[M+H]+	Terpenoids	-
Tartronate semialdehyde*	Negative	103	59.01	104.011	C3H4O4	[M-H]-	Organic acids	2480-77-5
3-Dehydro-L-Threonic Acid	Negative	133.01	71.01	134.0215	C4H6O5	[M-H]-	Others	-
2-Hydroxy-2-methyl-3-oxobutanoic acid*	Negative	131.03	87.04	132.0423	C5H8O4	[M-H]-	Organic acids	71698-08-3
4-Hydroxy-2-Oxopentanoic Acid*	Negative	131.03	87.05	132.0423	C5H8O4	[M-H]-	Organic acids	3318-73-8
2-Acetyl-2-Hydroxybutanoic Acid	Negative	145.05	83.05	146.0579	C6H10O4	[M-H]-	Organic acids	-
3-Isopropylmalic Acid*	Negative	175.06	115.04	176.0685	C7H12O5	[M-H]-	Organic acids	921-28-8
2,5-Dihydroxybenzaldehyde*	Negative	137.02	93.03	138.0317	C7H6O3	[M-H]-	Others	1194-98-5
2-Propylsuccinic acid	Negative	159.07	97.07	160.0736	C7H12O4	[M-H]-	Organic acids	618-57-5
α-Hydroxycinnamic Acid*	Negative	163.04	119.05	164.0473	C9H8O3	[M-H]-	Phenolic acids	5801-57-0
2,6-Dimethoxybenzaldehyde	Negative	165.06	119.05	166.063	C9H10O3	[M-H]-	Others	3392-97-0
13(S)-HODE;13(S)-Hydroxyoctadeca-9Z,11E-dienoic acid*	Negative	295.23	195.14	296.2351	C18H32O3	[M-H]-	Lipids	10219-69-9
13-KODE; (9Z,11E)-13-Oxooctadeca-9,11-dienoic acid	Negative	293.21	235.17	294.2195	C18H30O3	[M-H]-	Lipids	54739-30-9
Hydroxy ricinoleic acid	Negative	313.24	183.14	314.2457	C18H34O4	[M-H]-	Lipids	-
12-Hydroxyoctadec-9-Enoic Acid; Ricinoleic acid	Negative	297.24	183.14	298.2508	C18H34O3	[M-H]-	Lipids	141-22-0
2,4-Di-Tert-Butylphenol*	Negative	205.16	189.13	206.1671	C14H22O	[M-H]-	Phenolic acids	96-76-4
L-Homomethionine	Positive	164.07	56.05	163.0667	C6H13NO2S	[M+H]+	Amino acids and derivatives	25148-30-5
Sinapaldehyde-4-O-Glucoside	Positive	371.1	209.05	370.1264	C17H22O9	[M+H]+	Phenolic acids	154461-65-1
Methylhesperidin	Negative	623.2	315.08	624.2054	C29H36O15	[M-H]-	Flavonoids	11013-97-1
(7Z)-Hexadecenoic acid*	Negative	253.22	235.21	254.2246	C16H30O2	[M-H]-	Lipids	2416-19-5
L-Carnitine	Positive	162.11	85.03	161.1052	C7H15NO3	[M+H]+	Alkaloids	541-15-1
2-Amino-4,5-dihydro-1H-imidazole-4-acetic acid	Positive	144.08	84.06	143.0695	C5H9N3O2	[M+H]+	Alkaloids	69098-41-5
N6-(2-Hydroxyethyl)adenosine*	Positive	312.13	180.09	311.123	C12H17N5O5	[M+H]+	Nucleotides and derivatives	4338-48-1
Tamarixetin-3-O-glucoside (Tamarixin)	Positive	479.12	317.06	478.1111	C22H22O12	[M+H]+	Flavonoids	27542-39-8
Cyanidin-3-O-(6''-O-caffeoyl)glucoside	Positive	611.14	287.06	611.1395	C30H27O14+	[M]+	Flavonoids	-
Genipin	Positive	227.09	149.06	226.0841	C11H14O5	[M+H]+	Terpenoids	6902-77-8
Myricetin-3-O-galactoside*	Positive	481.1	319.06	480.0904	C21H20O13	[M+H]+	Flavonoids	15648-86-9
2,6,7,4'-Tetrahydroxyisoflavanone	Positive	289.07	243.07	288.0634	C15H12O6	[M+H]+	Flavonoids	-
Quercetin-3-O-alloside; Isohyperoside*	Positive	465.1	303.06	464.0955	C21H20O12	[M+H]+	Flavonoids	35589-21-0
Azaleatin (5-O-Methylquercetin)	Positive	317.07	302.04	316.0583	C16H12O7	[M+H]+	Flavonoids	529-51-1
6-O-p-Coumaroyl-β-D-glucose	Negative	325.09	145.03	326.1002	C15H18O8	[M-H]-	Phenolic acids	114297-65-3
α-D-glucosyl-(1→1')-3'-amino-3'-deoxy-β-D-glucoside	Positive	342.14	162.07	341.1322	C12H23NO10	[M+H]+	Others	-
Quercetagetin-7-O-glucoside(Quercetagitrin)*	Positive	481.1	319.05	480.0904	C21H20O13	[M+H]+	Flavonoids	548-75-4
3-Ureidopropionic Acid	Negative	131.05	70.03	132.0535	C4H8N2O3	[M-H]-	Organic acids	462-88-4
Succinic semialdehyde	Negative	101.02	55.02	102.0317	C4H6O3	[M-H]-	Organic acids	692-29-5
Tianshic acid	Negative	329.23	211.13	330.2406	C18H34O5	[M-H]-	Organic acids	-
3',4,4',5,7-Pentahydroxyflavan (Luteoforol)	Positive	291.09	139.04	290.079	C15H14O6	[M+H]+	Flavonoids	13392-26-2
Vnilloylcaffeoyltartaric acid	Negative	461.07	167.04	462.0798	C21H18O12	[M-H]-	Phenolic acids	-
7-O-Galloyltricetiflavan	Negative	441.08	289.07	442.09	C22H18O10	[M-H]-	Flavonoids	-
Cyclo(Pro-Glu)	Positive	227.1	116.07	226.0954	C10H14N2O4	[M+H]+	Amino acids and derivatives	-
L-Prolyl-L-Leucine	Positive	229.15	70.07	228.1474	C11H20N2O3	[M+H]+	Amino acids and derivatives	52899-07-7
L-Valyl-L-Leucine	Positive	231.17	72.08	230.163	C11H22N2O3	[M+H]+	Amino acids and derivatives	3989-97-7
L-Prolyl-L-Phenylalanine	Positive	263.14	70.06	262.1317	C14H18N2O3	[M+H]+	Amino acids and derivatives	13589-02-1
L-Valyl-L-Phenylalanine	Positive	265.15	72.08	264.1474	C14H20N2O3	[M+H]+	Amino acids and derivatives	3918-92-1
LysoPE 18:3(2n isomer)	Positive	476.28	335.26	475.2699	C23H42NO7P	[M+H]+	Lipids	-
LysoPE 18:3	Positive	476.28	335.26	475.2699	C23H42NO7P	[M+H]+	Lipids	-
LysoPC 18:1(2n isomer)	Positive	522.36	184.07	521.3481	C26H52NO7P	[M+H]+	Lipids	-
1-α-Linolenoyl-glycerol*	Positive	353.27	261.22	352.2614	C21H36O4	[M+H]+	Lipids	-
Fusarester B	Negative	277.18	205.16	278.1882	C17H26O3	[M-H]-	Others	-
Quercetin-3-O-neohesperidoside	Positive	611.16	303.05	610.1534	C27H30O16	[M+H]+	Flavonoids	29662-79-1
Isofraxidin-7-O-glucoside	Positive	385.11	223.06	384.1056	C17H20O10	[M+H]+	Lignans and Coumarins	483-91-0
Patuletin-3-O-glucoside	Positive	495.11	333.07	494.106	C22H22O13	[M+H]+	Flavonoids	-
6-Methoxykaempferol-3-O-glucoside*	Positive	479.12	317.07	478.1111	C22H22O12	[M+H]+	Flavonoids	63422-27-5
Integracide H	Positive	599.4	337.21	598.387	C36H54O7	[M+H]+	Terpenoids	-
Loliolide	Positive	197.12	133.1	196.1099	C11H16O3	[M+H]+	Terpenoids	5989-02-6
Dihydronaphthalenone	Positive	147.08	115.05	146.0732	C10H10O	[M+H]+	Others	530-93-8
Agrimonolide	Positive	315.123	121.064	314.1154	C18H18O5	[M+H]+	Lignans and Coumarins	21499-24-1
6,9,10-Trihydroxyoctadec-7-enoic acid; Sanleng acid*	Negative	329.23	171.101	330.2406	C18H34O5	[M-H]-	Lipids	-
2,6-Di-tert-butylphenol*	Negative	205.16	189.13	206.1671	C14H22O	[M-H]-	Phenolic acids	128-39-2
Dihydrocaffeoylglucose*	Negative	343.1	181.05	344.1107	C15H20O9	[M-H]-	Phenolic acids	-
Dimethylmalonic acid*	Negative	131.035	87.0459	132.0423	C5H8O4	[M-H]-	Organic acids	595-46-0
2-Hydroxycinnamic acid*	Negative	163.04	119.05	164.0473	C9H8O3	[M-H]-	Phenolic acids	583-17-5
2-Hydroxyhexadecanoic acid	Negative	271.23	225.22	272.2351	C16H32O3	[M-H]-	Organic acids	764-67-0
5-Glucosyloxy-2-Hydroxybenzoic acid methyl ester	Negative	329.09	167.04	330.0951	C14H18O9	[M-H]-	Phenolic acids	-
2-Hydroxy-4-methyl-3-undecanoyloxypentanoic acid methyl ester*	Negative	329.23	171.1	330.2406	C18H34O5	[M-H]-	Lipids	-
7β-Hydroxydarutigenol	Negative	337.23	157.12	338.2457	C20H34O4	[M-H]-	Terpenoids	1188281-99-3
Glucan	Positive	505.17	145.05	504.169	C18H32O16	[M+H]+	Others	9041-22-9
2-Ethyl-3-methylmaleimide-N-glucoside	Positive	302.12	140.07	301.1162	C13H19NO7	[M+H]+	Alkaloids	-
Gossypetin-3-O-glucoside*	Positive	481.1	319.05	480.0904	C21H20O13	[M+H]+	Flavonoids	-
N-(4-Aminobutyl)benzamide	Positive	193.13	105.03	192.1263	C11H16N2O	[M+H]+	Alkaloids	5692-23-9
Gossypetin-3-O-(6''-malonyl)glucoside*	Positive	567.1	319.05	566.0908	C24H22O16	[M+H]+	Flavonoids	-
Sexangularetin-3-O-glucoside-7-O-rhamnoside*	Positive	625.18	317.07	624.169	C28H32O16	[M+H]+	Flavonoids	-
6-C-Methylquercetin-3-O-rutinoside*	Positive	625.18	317.06	624.169	C28H32O16	[M+H]+	Flavonoids	-
Quercetin-3-O-(4''-O-glucosyl)rhamnoside*	Positive	611.16	303.05	610.1534	C27H30O16	[M+H]+	Flavonoids	59262-54-3
Nuezhengalaside	Negative	387.17	207.1	388.1733	C18H28O9	[M-H]-	Terpenoids	-
5,7,3',4'-Tetrahydroxy-6-methoxyflavone-8-C-[glucosyl-(1-2)]-glucoside	Positive	641.17	479.11	640.1639	C28H32O17	[M+H]+	Flavonoids	-
Cirsimaritin-8-C-glucoside	Positive	477.14	357.09	476.1319	C23H24O11	[M+H]+	Flavonoids	-
Petunidin-3-O-(6''-O-caffeoyl)glucoside	Positive	641.15	317.07	641.1501	C31H29O15+	[M]+	Flavonoids	-
Myricetin-3-O-β-D-glucoside*	Positive	481.1	319.04	480.0904	C21H20O13	[M+H]+	Flavonoids	19833-12-6
Delphinidin-3-O-(6''-O-p-coumaroyl)glucoside	Positive	611.14	303.05	611.1395	C30H27O14+	[M]+	Flavonoids	-
Cyanidin-3-O-(6''-O-p-Coumaroyl)glucoside	Positive	595.14	287.06	595.1446	C30H27O13+	[M]+	Flavonoids	-
Petunidin-3-O-(6''-O-p-Coumaroyl)glucoside	Positive	625.16	317.07	625.1552	C31H29O14+	[M]+	Flavonoids	-
Rutinose	Negative	325.11	59.01	326.1213	C12H22O10	[M-H]-	Others	90-74-4
4,5,8-Trihydroxy-α-tetralone	Negative	193.05	133.03	194.0579	C10H10O4	[M-H]-	Quinones	-
2',3',4',5,7-Pentahydroxyflavone*	Negative	301.04	151	302.0427	C15H10O7	[M-H]-	Flavonoids	-
5-Aminoimidazole ribonucleotide	Positive	296.07	104.11	295.0569	C8H14N3O7P	[M+H]+	Nucleotides and derivatives	25635-88-5
N-Methyl-Trans-4-Hydroxy-L-Proline	Positive	146.08	82.07	145.0739	C6H11NO3	[M+H]+	Amino acids and derivatives	4252-82-8
Succinic anhydride	Positive	101.02	55.02	100.016	C4H4O3	[M+H]+	Organic acids	108-30-5
Alnusonol	Positive	313.14	151.08	312.1362	C19H20O4	[M+H]+	Phenolic acids	52330-12-8
Kaempferol-3-O-xylosyl(1→2)glucoside	Positive	581.15	287.05	580.1428	C26H28O15	[M+H]+	Flavonoids	-
2-Amino-1,3-eicosanediol	Positive	330.34	312.33	329.3294	C20H43NO2	[M+H]+	Others	-
Methyl Cinnamate	Positive	163.08	103.05	162.0681	C10H10O2	[M+H]+	Phenolic acids	103-26-4
L-Seryl-L-Isoleucine	Positive	219.13	60.04	218.1267	C9H18N2O4	[M+H]+	Amino acids and derivatives	91086-51-0
L-Isoleucyl-L-Aspartate	Positive	247.13	86.09	246.1216	C10H18N2O5	[M+H]+	Amino acids and derivatives	-
2-Hydroxy-3-(4-Hydroxyphenyl)Propanoic Acid*	Negative	181.05	135.04	182.0579	C9H10O4	[M-H]-	Phenolic acids	23508-35-2
2-Hydroxy-4-methylpentanoic acid	Negative	131.07	85.07	132.0786	C6H12O3	[M-H]-	Organic acids	498-36-2
2-Hydroxy-3-phenylpropanoic acid	Negative	165.06	103.06	166.063	C9H10O3	[M-H]-	Phenolic acids	7326-19-4
D-Maltose*	Negative	341.109	89.0244	342.1162	C12H22O11	[M-H]-	Others	69-79-4
Dambonitol	Negative	207.09	59.01	208.0947	C8H16O6	[M-H]-	Others	523-94-4
3,4,2',4',6'-Pentahydroxychalcone-4'-O-glucoside	Negative	449.11	287.06	450.1162	C21H22O11	[M-H]-	Flavonoids	-
1,6-Di-O-caffeoyl-β-D-glucose	Negative	503.12	179.03	504.1268	C24H24O12	[M-H]-	Phenolic acids	-
2,19-Dihydroxy-3-oxours-12-en-28-oic acid	Negative	485.33	485.33	486.3345	C30H46O5	[M-H]-	Terpenoids	176983-21-4
Isorhamnetin-3-O-glucoside-7-O-rhamnoside	Positive	625.18	317.07	624.169	C28H32O16	[M+H]+	Flavonoids	17331-71-4
Quercetin-3-O-glucoside-7-O-rhamnoside*	Positive	611.16	303.05	610.1534	C27H30O16	[M+H]+	Flavonoids	-
Dehydrodiconiferyl alcohol	Positive	359.15	131.05	358.1416	C20H22O6	[M+H]+	Lignans and Coumarins	4263-87-0
Kaempferol-3-O-glucoside-7-O-rhamnoside*	Positive	595.17	287.06	594.1585	C27H30O15	[M+H]+	Flavonoids	2392-95-2
Tamarixetin-3-O-glucoside-7-O-rhamnoside*	Positive	625.18	317.07	624.169	C28H32O16	[M+H]+	Flavonoids	-
Aureusidin-4-O-glucoside*	Positive	449.11	287.06	448.1006	C21H20O11	[M+H]+	Flavonoids	-
Androsin	Negative	327.11	165.05	328.1158	C15H20O8	[M-H]-	Phenolic acids	531-28-2
1-O-Vanilloyl-D-Glucose	Negative	329.11	167.03	330.0951	C14H18O9	[M-H]-	Phenolic acids	-
Aromadendrin-7-O-glucoside	Negative	449.11	287.06	450.1162	C21H22O11	[M-H]-	Flavonoids	28189-90-4
Sambunigrin	Negative	294.1	161.04	295.1056	C14H17NO6	[M-H]-	Alkaloids	99-19-4
Secoisolariciresinol 4-O-glucoside	Negative	523.22	361.14	524.2258	C26H36O11	[M-H]-	Lignans and Coumarins	-
Abscisic acid	Negative	263.13	204.12	264.1362	C15H20O4	[M-H]-	Organic acids	21293-29-8
3',5',5,7-Tetrahydroxy-4'-methoxyflavanone-3'-O-glucoside	Positive	481.13	319.05	480.1268	C22H24O12	[M+H]+	Flavonoids	-
Myricetin-3-O-(6''-malony)glucoside*	Positive	567.1	319.04	566.0908	C24H22O16	[M+H]+	Flavonoids	-
Kaempferol-3-O-mannoside（Amoenin）	Positive	449.11	287.06	448.1006	C21H20O11	[M+H]+	Flavonoids	-
Bis(2-ethylhexyl)phthalate	Positive	391.28	149.02	390.277	C24H38O4	[M+H]+	Phenolic acids	117-81-7
D-Lactose*	Negative	341.11	89.02	342.1162	C12H22O11	[M-H]-	Others	63-42-3
6''-O-Caffeoylharpagide	Negative	525.16	161.02	526.1686	C24H30O13	[M-H]-	Terpenoids	1147125-45-8
Zarzissine	Positive	136.06	119.04	135.0545	C5H5N5	[M+H]+	Alkaloids	160568-14-9
2-Palmitoylglycerol*	Positive	331.28	313.27	330.277	C19H38O4	[M+H]+	Lipids	23470-00-0
Diisobutyl phthalate*	Positive	279.16	149.02	278.1518	C16H22O4	[M+H]+	Phenolic acids	84-69-5
Tropic acid	Negative	165.055	103.055	166.063	C9H10O3	[M-H]-	Organic acids	552-63-6
Mandelic acid-β-glucoside	Negative	313.09	101.02	314.1002	C14H18O8	[M-H]-	Organic acids	-
Demethyl-Secoisolariciresinol	Negative	347.15	165.05	348.1573	C19H24O6	[M-H]-	Lignans and Coumarins	-
Sakuranin	Negative	447.13	285.08	448.1369	C22H24O10	[M-H]-	Flavonoids	529-39-5
9,10,18-Trihydroxystearic acid	Negative	331.25	157.12	332.2563	C18H36O5	[M-H]-	Lipids	496-86-6
9,16-Dihydroxypalmitic acid	Negative	287.22	287.22	288.2301	C16H32O4	[M-H]-	Lipids	38076-49-2
Erucic acid	Negative	337.31	337.31	338.3185	C22H42O2	[M-H]-	Lipids	112-86-7
3-Hydroxy-1-(4-hydroxy-3,5-dimethoxyphenyl)propan-1-one	Positive	227.09	181.09	226.0841	C11H14O5	[M+H]+	Others	-
5'-Glucosyloxyjasmanic acid	Negative	387.17	207.1	388.1733	C18H28O9	[M-H]-	Phenolic acids	-
D-Threo-guaiacylglycerol-7-O-β-D-glucoside	Negative	375.13	135.05	376.1369	C16H24O10	[M-H]-	Phenolic acids	-
Elaeocarpucin G	Positive	487.34	423.33	486.3345	C30H46O5	[M+H]+	Terpenoids	-
3S-3-hydroxy-β-damascon	Positive	209.15	137.1	208.1463	C13H20O2	[M+H]+	Terpenoids	-
Secoisolariciresinol	Positive	363.18	137.06	362.1729	C20H26O6	[M+H]+	Lignans and Coumarins	29388-59-8
2,3,23-Trihydroxyurs-12,19(29)-dien-28-oic acid	Positive	487.34	405.31	486.3345	C30H46O5	[M+H]+	Terpenoids	-
Cuscohygrine	Positive	225.2	100.11	224.1889	C13H24N2O	[M+H]+	Alkaloids	454-14-8
1-(9Z,12Z-octadecadienoyl)-sn-glycero-3-phosphocholine	Negative	578.34	504.31	519.3324902	C26H50NO7P	[M+CH3COO]-	Lipids	22252-07-9
LysoPC(18:3(9Z,12Z,15Z))	Negative	576.33	502.29	517.3168401	C26H48NO7P	[M+CH3COO]-	Lipids	-
D-Arabinono-1,4-lactone	Negative	147.03	85.03	148.0372	C5H8O5	[M-H]-	Others	2782-09-4
Hydroxypyruvic acid*	Negative	103.004	59.0136	104.011	C3H4O4	[M-H]-	Organic acids	1113-60-6
Confertifoline	Negative	233.16	233.16	234.162	C15H22O2	[M-H]-	Terpenoids	1811-23-0
3-Dehydroshikimic acid	Negative	171.03	109.03	172.0372	C7H8O5	[M-H]-	Organic acids	2922-42-1
2-Phenylethanol	Positive	105.07	77.04	122.0732	C8H10O	[M-H2O+H]+	Phenolic acids	60-12-8
Cytarabine	Positive	244.09	112.05	243.0855	C9H13N3O5	[M+H]+	Nucleotides and derivatives	147-94-4
Cycloleucine	Positive	130.09	84.08	129.079	C6H11NO2	[M+H]+	Amino acids and derivatives	52-52-8
5,8,11-Eicosatriynoic Acid	Negative	359.22	277.22	300.2089302	C20H28O2	[M+CH3COO]-	Lipids	13488-22-7
7-oxo-11-Dodecenoic acid	Negative	211.13	167.15	212.1412446	C12H20O3	[M-H]-	Lipids	54921-60-7
12(13)Ep-9-KODE	Negative	309.21	171.1	310.2144096	C18H30O4	[M-H]-	Lipids	-
9s,13r-12-Oxophytodienoic Acid	Negative	291.2	73.03	292.2038449	C18H28O3	[M-H]-	Lipids	71606-07-0
Octadecanedioic acid	Negative	313.24	295.23	314.2457097	C18H34O4	[M-H]-	Lipids	871-70-5
Toyocamycin	Negative	290.09	128.03	291.096754	C12H13N5O4	[M-H]-	Nucleotides and derivatives	606-58-6
His-Phe	Negative	361.15	155.11	302.1378905	C15H18N4O3	[M+CH3COO]-	Amino acids and derivatives	16874-81-0
L-Tyrosyl-L-serine	Negative	267.1	78.96	268.1059217	C12H16N2O5	[M-H]-	Amino acids and derivatives	13588-99-3
Abu-Asp-OH	Negative	325.07	151.04	326.0750155	C13H14N2O8	[M-H]-	Amino acids and derivatives	-
Abu-His-OH	Negative	347.1	167.03	348.1069843	C15H16N4O6	[M-H]-	Amino acids and derivatives	-
Nicotinate adenine dinucleotide phosphate	Negative	743.04	217	744.0594693	C21H27N6O18P3	[M-H]-	Nucleotides and derivatives	5502-96-5
NG,NG-Dimethyl-L-arginine*	Positive	203.15	70.07	202.143	C8H18N4O2	[M+H]+	Amino acids and derivatives	30315-93-6
2-Amino-3-methoxybenzoic acid	Positive	168.06	94.06	167.0582	C8H9NO3	[M+H]+	Phenolic acids	3177-80-8
6-C-Methylquercetin-3-O-glucoside*	Positive	479.12	317.07	478.1111	C22H22O12	[M+H]+	Flavonoids	-
N-(beta-D-Glucosyl)nicotinate*	Positive	286.09	124.04	285.0849	C12H15NO7	[M+H]+	Others	-
Histidinol	Positive	142.1	124.09	141.0902	C6H11N3O	[M+H]+	Alkaloids	501-28-0
Nicotinate D-ribonucleoside	Positive	256.08	124.04	256.0816	C11H14NO6+	[M]+	Others	17720-18-2
5-Aminolevulinic Acid	Positive	132.07	86.06	131.0582	C5H9NO3	[M+H]+	Alkaloids	106-60-5
L-α-Glutamyl-L-Glutamic Acid	Positive	277.1	148.06	276.0958	C10H16N2O7	[M+H]+	Amino acids and derivatives	3929-61-1
Benzamide	Positive	122.06	105.03	121.0528	C7H7NO	[M+H]+	Alkaloids	55-21-0
Feruloyl syringic acid	Positive	375.11	137.1	374.1002	C19H18O8	[M+H]+	Phenolic acids	-
L-Aspartic acid-O-diglucoside	Positive	458.15	116.03	457.1432	C16H27NO14	[M+H]+	Amino acids and derivatives	-
p-Coumaroylputrescine	Positive	235.14	147.04	234.1368	C13H18N2O2	[M+H]+	Alkaloids	34136-53-3
N-p-Coumaroyl-N'-feruloylputrescine	Positive	411.19	177.05	410.1842	C23H26N2O5	[M+H]+	Alkaloids	380302-96-5
Azoxystrobin acid	Positive	390.11	328.07	389.1012	C21H15N3O5	[M+H]+	Alkaloids	1185255-09-7
Piperidine	Positive	86.1	69.07	85.0891	C5H11N	[M+H]+	Alkaloids	110-89-4
Methoxyindoleacetic acid	Positive	206.08	145.05	205.0739	C11H11NO3	[M+H]+	Alkaloids	3471-31-6
3-Indoleacetonitrile	Positive	157.08	130.07	156.0687	C10H8N2	[M+H]+	Alkaloids	771-51-7
LysoPC 18:3	Positive	518.32	184.07	517.3168	C26H48NO7P	[M+H]+	Lipids	-
LysoPE 18:1(2n isomer)*	Positive	480.31	339.29	479.3012	C23H46NO7P	[M+H]+	Lipids	-
LysoPC 18:3(2n isomer)	Positive	518.32	184.07	517.3168	C26H48NO7P	[M+H]+	Lipids	-
LysoPE 18:2(2n isomer)	Positive	478.29	337.27	477.2855	C23H44NO7P	[M+H]+	Lipids	-
LysoPE 18:2	Positive	478.29	337.27	477.2855	C23H44NO7P	[M+H]+	Lipids	-
Punicic acid (9Z,11E,13Z-octadecatrienoic acid)	Positive	279.23	95.09	278.2246	C18H30O2	[M+H]+	Lipids	544-72-9
Octadeca-11E,13E,15Z-trienoic acid	Positive	279.23	149.13	278.2246	C18H30O2	[M+H]+	Lipids	25575-00-2
10-Formyltetrahydrofolic Acid	Positive	474.17	327.12	473.1659	C20H23N7O7	[M+H]+	Alkaloids	2800-34-2
2-Deoxyribose-1-phosphate*	Negative	213.02	96.97	214.0242	C5H11O7P	[M-H]-	Nucleotides and derivatives	17210-42-3
Anthranilate-1-O-Sophoroside	Negative	460.15	117.9	461.1533	C19H27NO12	[M-H]-	Phenolic acids	-
Argininosuccinic acid	Negative	289.12	131.08	290.1226	C10H18N4O6	[M-H]-	Organic acids	2387-71-5
4-Hydroxycoumarin di-glucoside	Negative	485.13	323.2	486.1373	C21H26O13	[M-H]-	Lignans and Coumarins	-
4-Methoxycinnamic acid	Negative	177.06	133.07	178.063	C10H10O3	[M-H]-	Phenolic acids	830-09-1
O-Caffeoyl maltotriose	Negative	665.19	218.1	666.2007	C27H38O19	[M-H]-	Phenolic acids	-
L-Glutamine-O-glycoside	Negative	307.11	145.06	308.122	C11H20N2O8	[M-H]-	Amino acids and derivatives	-
Tricin-7-O-saccharic acid	Negative	521.09	329.2	522.101	C23H22O14	[M-H]-	Flavonoids	-
1-O-p-Coumaroylquinic acid*	Negative	337.09	163.04	338.1002	C16H18O8	[M-H]-	Phenolic acids	-
5-O-p-Coumaroylquinic acid	Negative	337.09	191.06	338.1002	C16H18O8	[M-H]-	Phenolic acids	1899-30-5
Esculetin-7-O-quinic acid	Negative	351.072	105.1	352.0794	C16H16O9	[M-H]-	Lignans and Coumarins	-
2-Isopropylmalic Acid	Negative	175.06	115.04	176.0685	C7H12O5	[M-H]-	Organic acids	49601-06-1
Salicylic acid-2-O-glucoside	Negative	299.08	137.02	300.0845	C13H16O8	[M-H]-	Phenolic acids	10366-91-3
2'-Deoxyinosine-5'-monophosphate	Positive	333.06	137.05	332.0522	C10H13N4O7P	[M+H]+	Nucleotides and derivatives	3393-18-8
Ribosyladenosine	Positive	400.15	136.06	399.139	C15H21N5O8	[M+H]+	Nucleotides and derivatives	-
Allopurinol	Positive	137.05	110.03	136.0385	C5H4N4O	[M+H]+	Nucleotides and derivatives	315-30-0
2-Picolinic acid	Negative	122.02	78.03	123.032	C6H5NO2	[M-H]-	Organic acids	98-98-6
Malonic acid	Negative	103	59.01	104.011	C3H4O4	[M-H]-	Organic acids	141-82-2
Raffinose*	Negative	503.162	179.055	504.169	C18H32O16	[M-H]-	Others	512-69-6
D-Fructose-1,6-biphosphate	Negative	338.99	96.97	339.996	C6H14O12P2	[M-H]-	Others	488-69-7
Pinoresinol-4,4'-O-diglucoside	Negative	681.24	519.19	682.2473	C32H42O16	[M-H]-	Lignans and Coumarins	63902-38-5
Pinoresinol-4-O-glucoside	Negative	519.19	357.14	520.1945	C26H32O11	[M-H]-	Lignans and Coumarins	41607-20-9
Eucommiol	Negative	187.1	169.09	188.1049	C9H16O4	[M-H]-	Others	55930-44-4
Eucommioside	Negative	349.15	187.1	350.1577	C15H26O9	[M-H]-	Terpenoids	-
Cornoside	Negative	315.11	135.05	316.1158	C14H20O8	[M-H]-	Phenolic acids	40661-45-8
1-O-p-Coumaroyl-β-D-glucose*	Negative	325.09	163.04	326.1002	C15H18O8	[M-H]-	Phenolic acids	7139-64-2
Roseoside	Negative	385.19	223.14	386.1941	C19H30O8	[M-H]-	Others	54835-70-0
Dendrobiumane D	Negative	283.16	59	284.1624	C15H24O5	[M-H]-	Others	-
Cimidahurinine*	Negative	315.11	153.06	316.1158	C14H20O8	[M-H]-	Phenolic acids	142542-89-0
Quercetin-3-O-robinobioside	Negative	609.15	300.03	610.1534	C27H30O16	[M-H]-	Flavonoids	52525-35-6
10,16-Dihydroxypalmitic acid	Negative	287.22	241.22	288.2301	C16H32O4	[M-H]-	Lipids	3233-90-7
9-Hydroxy-12-oxo-15(Z)-octadecenoic acid*	Negative	311.22	223.17	312.2301	C18H32O4	[M-H]-	Lipids	-
3-Hydroxy-4-isopropylbenzylalcohol-3-O-glucoside	Negative	327.14	165.09	328.1522	C16H24O7	[M-H]-	Phenolic acids	-
9,10,13-Trihydroxy-11-Octadecenoic Acid	Negative	329.23	229.15	330.2406	C18H34O5	[M-H]-	Lipids	29907-57-1
Oleuropeinic acid	Negative	569.15	389.09	570.1585	C25H30O15	[M-H]-	Terpenoids	96382-90-0
2-Feruloyl-sn-glycerol	Positive	269.1	177.05	268.0947	C13H16O6	[M+H]+	Phenolic acids	-
3,5,6,7,8,3',4'-Heptamethoxyflavone	Positive	433.15	403.11	432.142	C22H24O9	[M+H]+	Flavonoids	1178-24-1
Andrographiside	Positive	530.3	315.16	512.2621	C26H40O10	[M+NH4]+	Terpenoids	82209-76-5
3α-Dihydrocadambine	Positive	547.23	367.17	546.2213	C27H34N2O10	[M+H]+	Alkaloids	54483-84-0
Luteolin-7-O-rutinoside*	Positive	595.17	287.06	594.1585	C27H30O15	[M+H]+	Flavonoids	3563-98-2
3'-O-D-glucosylgentiopicroside	Positive	536.2	195.06	518.1636	C22H30O14	[M+NH4]+	Terpenoids	-
Dihydrocaffeoyltyramine	Positive	302.14	103.05	301.1314	C17H19NO4	[M+H]+	Alkaloids	-
6-Deoxyfagomine	Positive	132.1	57.03	131.0946	C6H13NO2	[M+H]+	Alkaloids	197449-09-5
Senkyunolide M	Positive	279.16	121.03	278.1518	C16H22O4	[M+H]+	Others	146986-60-9
LysoPC 18:2(2n isomer)	Positive	520.34	184.07	519.3325	C26H50NO7P	[M+H]+	Lipids	-
Hexadecylsphingosine	Positive	274.27	256.27	273.2668	C16H35NO2	[M+H]+	Lipids	-
Hexadecyl ethanolamine	Positive	286.31	268.3	285.3032	C18H39NO	[M+H]+	Alkaloids	-
LysoPC 18:2	Positive	520.34	184.07	519.3325	C26H50NO7P	[M+H]+	Lipids	-
LysoPC 18:1	Positive	522.36	184.07	521.3481	C26H52NO7P	[M+H]+	Lipids	-
Monopalmitin*	Positive	331.28	313.27	330.277	C19H38O4	[M+H]+	Lipids	542-44-9
N-Benzylmethylene isomethylamine	Positive	120.08	103.05	119.0735	C8H9N	[M+H]+	Alkaloids	-
6-Hydroxykaempferol-7-O-glucoside	Positive	465.1	303.1	464.0955	C21H20O12	[M+H]+	Flavonoids	-
6-Hydroxykaempferol-3,6-O-Diglucoside	Positive	627.16	303.1	626.1483	C27H30O17	[M+H]+	Flavonoids	-
Lignans Machilin F	Positive	343.15	105.03	342.1467	C20H22O5	[M+H]+	Lignans and Coumarins	-
Spiramine I	Positive	400.249	340.228	399.241	C24H33NO4	[M+H]+	Alkaloids	-
Spiramine N	Positive	360.254	123.045	359.246	C22H33NO3	[M+H]+	Alkaloids	-
2,3-Dihydroxyurs-12,18-dien-28-oic acid (Goreishic Acid I)	Positive	471.35	201.16	470.3396	C30H46O4	[M+H]+	Terpenoids	129058-59-9
11β-Hydroxy-8,15-isopimaradiene-4-one	Positive	303.23	257.22	302.2246	C20H30O2	[M+H]+	Terpenoids	-
Avicennol*	Positive	343.15	163.07	342.1467	C20H22O5	[M+H]+	Lignans and Coumarins	56110-68-0
D-Proline betaine	Positive	144.1	84.08	144.1019	C7H14NO2+	[M]+	Amino acids and derivatives	1195-94-4
Orobanchoside	Negative	639.193	477.159	640.2003	C29H36O16	[M-H]-	Phenolic acids	-
Tetraphyllin A*	Positive	272.11	110.06	271.1056	C12H17NO6	[M+H]+	Alkaloids	-
Tuberonic acid glucoside	Negative	387.17	207.11	388.1733	C18H28O9	[M-H]-	Organic acids	120399-24-8
N-benzoyl-2-aminoethyl-β-D-glucopyranoside	Positive	328.13	310.12	327.1318	C15H21NO7	[M+H]+	Alkaloids	-
naphthisoxazol A*	Positive	188.07	118.06	187.0633	C11H9NO2	[M+H]+	Alkaloids	-
Quercetin-5-O-β-D-glucoside*	Positive	465.1	303.05	464.0955	C21H20O12	[M+H]+	Flavonoids	-
Cinchonain Ia*	Positive	453.11	343.08	452.1107	C24H20O9	[M+H]+	Flavonoids	85022-69-1
3β-Isodihydrocadambine	Positive	547.23	385.17	546.2213	C27H34N2O10	[M+H]+	Alkaloids	62014-69-1
Cinchonain Ib*	Positive	453.11	343.08	452.1107	C24H20O9	[M+H]+	Flavonoids	85081-24-9
tortoside f	Positive	519.18	339.12	518.1788	C26H30O11	[M+H]+	Lignans and Coumarins	-
8-O-methyl-7-hydroxyaloin	Positive	449.14	287.09	448.1369	C22H24O10	[M+H]+	Quinones	-
7-O-Methylaloesin	Positive	409.15	247.09	408.142	C20H24O9	[M+H]+	Flavonoids	-
2,3,23-Trihydroxyolean-12-en-28-oic acid*	Negative	487.34	487.34	488.3502	C30H48O5	[M-H]-	Terpenoids	-
3'-O-Beta-D-Glucopyranosyl plumbagic acid	Negative	385.11	179.07	386.1213	C17H22O10	[M-H]-	Phenolic acids	-
2-O-(1'-O-glucosylCaffeoyl)hydroxycitric Acid	Negative	531.09	189.01	532.1064	C21H24O16	[M-H]-	Phenolic acids	-
2-O-P-Coumaroylhydroxycitric Acid	Negative	353.05	127	354.0587	C15H14O10	[M-H]-	Phenolic acids	-
Dihydroferulic acid glucoside	Negative	357.12	195.07	358.1264	C16H22O9	[M-H]-	Phenolic acids	-
4-O-(4'-O-alpha-D-Glucopyranosyl)caffeoylquinic acid	Negative	515.14	323.08	516.1479	C22H28O14	[M-H]-	Phenolic acids	1401352-62-2
3-(2-MethylButyryl)Sucrose-2-O-Acetate	Negative	527.2	341.11	468.1843	C19H32O13	[M+CH3COOH-H]-	Others	-
3-Methylbutyl 6-O-(alpha-L-arabinopyranosyl)-beta-D-glucopyranoside	Negative	441.2	249.13	382.1839	C16H30O10	[M+CH3COOH-H]-	Others	-
alpha-Hydroxylinoleic acid*	Negative	295.23	195.14	296.2351	C18H32O3	[M-H]-	Lipids	57818-44-7
Limocitrin 3-Glucoside*	Positive	509.13	347.08	508.1217	C23H24O13	[M+H]+	Flavonoids	-
2-Hexylphosphoric Acid	Positive	183.08	98.98	182.0708	C6H15O4P	[M+H]+	Others	-
3,5,6,7,8,4'-Hexamethoxyflavone	Positive	403.14	373.09	402.1315	C21H22O8	[M+H]+	Flavonoids	34170-18-8
N1,N10-Bis(p-coumaroyl)spermidine	Positive	438.24	292.2	437.2309	C25H31N3O4	[M+H]+	Alkaloids	114916-05-1
Di-p-coumaroylcaffeoyl Spermidine	Positive	600.27	454.24	599.2626	C34H37N3O7	[M+H]+	Alkaloids	-
Tri-p-coumaroyl Spermidine	Positive	584.28	438.24	583.2677	C34H37N3O6	[M+H]+	Alkaloids	-
Di-p-coumaroylferuloyl Spermidine	Positive	614.29	468.25	613.2783	C35H39N3O7	[M+H]+	Alkaloids	-
Diferuloyl-p-coumaroyl Spermidine	Positive	644.31	468.25	643.2888	C36H41N3O8	[M+H]+	Alkaloids	-
1-(2,3-dihydroxypropoxy)-3-(((2-(dimethylamino)ethoxy)(hydroxy)phosphoryl)oxy)propan-2-yl (8E,11Z,14Z)-octadeca-8,11,14-trienoate	Negative	576.33	277.22	577.338	C28H52NO9P	[M-H]-	Lipids	-
2-(2,3-dihydroxypropoxy)-3-(((2-(dimethylamino)ethoxy)(hydroxy)phosphoryl)oxy)propyl (8E,11Z,14Z)-octadeca-8,11,14-trienoate	Negative	576.33	277.22	577.338	C28H52NO9P	[M-H]-	Lipids	-
1-(2,3-dihydroxypropoxy)-3-(((2-(dimethylamino)ethoxy)(hydroxy)phosphoryl)oxy)propan-2-yl (11Z,14Z)-octadeca-11,14-dienoate	Negative	578.35	279.23	579.3536	C28H54NO9P	[M-H]-	Lipids	-
2-(2,3-dihydroxypropoxy)-3-(((2-(dimethylamino)ethoxy)(hydroxy)phosphoryl)oxy)propyl (11Z,14Z)-octadeca-11,14-dienoate	Negative	578.34	279.23	579.3536	C28H54NO9P	[M-H]-	Lipids	-
2-(2,3-dihydroxypropoxy)-3-(((2-(dimethylamino)ethoxy)(hydroxy)phosphoryl)oxy)propyl palmitate*	Negative	554.34	255.23	555.3536	C26H54NO9P	[M-H]-	Lipids	-
1-(2,3-dihydroxypropoxy)-3-(((2-(dimethylamino)ethoxy)(hydroxy)phosphoryl)oxy)propan-2-yl palmitate*	Negative	554.35	255.23	555.3536	C26H54NO9P	[M-H]-	Lipids	-
2-Aminotetradecane-1,11,13-triol	Positive	262.24	88.08	261.2304	C14H31NO3	[M+H]+	Lipids	-
2-Aminododecane-1,3,4-triol	Positive	234.21	88.08	233.1991	C12H27NO3	[M+H]+	Lipids	-
2-Aminotetradecane-1,5,7,11-tetraol	Positive	278.23	88.08	277.2253	C14H31NO4	[M+H]+	Lipids	-
2-Aminotetradecane-1,4-diol	Positive	246.24	88.08	245.2355	C14H31NO2	[M+H]+	Lipids	-
2-Aminotetradecane-1,5,11-triol	Positive	262.24	88.08	261.2304	C14H31NO3	[M+H]+	Lipids	-
2-Aminohexadecane-1,4-diol	Positive	274.27	88.08	273.2668	C16H35NO2	[M+H]+	Lipids	-
2-Amino-7-methyltridecan-1-ol*	Positive	230.25	62.06	229.2406	C14H31NO	[M+H]+	Lipids	-
2-AminoicoSane-1,6,18,19,20-pentaol	Positive	378.32	286.28	377.3141	C20H43NO5	[M+H]+	Lipids	-
2-Aminohexadecane-1,15-diol	Positive	274.27	88.08	273.2668	C16H35NO2	[M+H]+	Lipids	-
2-Aminooctadecane-1,5,7,17-tetraol	Positive	334.3	88.08	333.2879	C18H39NO4	[M+H]+	Lipids	-
2-AminoicoSane-1,5,7,19-tetraol	Positive	362.33	300.29	361.3192	C20H43NO4	[M+H]+	Lipids	-
2-aminodocoSane-1,6,19,20,21-pentaol	Positive	406.35	300.29	405.3454	C22H47NO5	[M+H]+	Lipids	-
2-Aminohexadecane-1,5,6-triol	Positive	290.27	88.08	289.2617	C16H35NO3	[M+H]+	Lipids	-
14-Amino-15-hydroxy-11-methylpentadecanoic acid	Positive	288.25	88.08	287.246	C16H33NO3	[M+H]+	Lipids	-
2-Aminooctadecane-1,4-diol	Positive	302.31	88.08	301.2981	C18H39NO2	[M+H]+	Lipids	-
2-AminoicoSane-1,5,19-triol	Positive	346.33	88.08	345.3243	C20H43NO3	[M+H]+	Lipids	-
2-aminodocoSane-1,5,7,21-tetraol	Positive	390.36	328.32	389.3505	C22H47NO4	[M+H]+	Lipids	-
2-AminodocoSane-1,5,21-triol	Positive	374.36	312.33	373.3556	C22H47NO3	[M+H]+	Lipids	-
2-aminotetracoSane-1,5,21,23-tetraol	Positive	418.39	356.35	417.3818	C24H51NO4	[M+H]+	Lipids	-
2-aminotetracoSane-1,5,23-triol	Positive	402.39	340.36	401.3869	C24H51NO3	[M+H]+	Lipids	-
6-O-alpha-L-arabinopyranosyl-D-glucopyranose	Negative	311.1	89.02	312.1056	C11H20O10	[M-H]-	Others	14116-69-9
Glucosyl 7-methyl-3-methyleneoctane-1,2,6,7-tetraol	Negative	365.18	203.13	366.189	C16H30O9	[M-H]-	Others	-
Glucosyl 2-Hydroxy-4-Methylpentanoic Acid	Negative	293.12	131.07	294.1315	C12H22O8	[M-H]-	Organic acids	-
Glucosyl 3,7-dimethyloct-2-ene-1,6,7-triol	Negative	409.21	187.13	350.1941	C16H30O8	[M+CH3COOH-H]-	Others	-
Glucosyl 6,9-dihydroxydec-4-enoic acid	Negative	363.17	201.11	364.1733	C16H28O9	[M-H]-	Others	-
Glucosyl 9-hydroxy-3-methyldec-2-enoic acid	Negative	361.19	199.13	362.1941	C17H30O8	[M-H]-	Others	-
Dihydroabscisic Acid 4'-O-glucoside	Negative	427.2	247.13	428.2046	C21H32O9	[M-H]-	Organic acids	-
N-(1-Deoxy-1-fructosyl)Asparagine	Negative	293.1	131.05	294.1069	C10H18N2O8	[M-H]-	Amino acids and derivatives	-
Citric acid-1-O-diglucoside	Negative	515.12	111.01	516.1326	C18H28O17	[M-H]-	Organic acids	-
Citric Acid diglucoside	Negative	515.12	341.11	516.1326	C18H28O17	[M-H]-	Organic acids	-
Citric acid glucoside	Negative	353.07	111	354.0798	C12H18O12	[M-H]-	Organic acids	-
Isocitric acid-1-O-diglucoside	Negative	515.12	111.01	516.1326	C18H28O17	[M-H]-	Organic acids	-
N-(1-Deoxy-1-fructosyl)Phenylalanine	Negative	326.12	164.07	327.1313	C15H21NO7	[M-H]-	Amino acids and derivatives	-
2-(Hydroxymethyl)Phenyl 2-O-Beta-D-Glucopyranosyl-Beta-D-Glucopyranoside	Negative	507.17	179.06	448.1581	C19H28O12	[M+CH3COOH-H]-	Phenolic acids	-
N-(1-Deoxy-1-fructosyl)Tryptophan	Negative	365.13	203.08	366.1422	C17H22N2O7	[M-H]-	Amino acids and derivatives	-
Guaiacylglycerol 8-O-(1''-O-Glucosyl)Vanillic Acid Ether	Negative	525.16	167.03	526.1686	C24H30O13	[M-H]-	Phenolic acids	-
Erythro-Guaiacylglycerol-β-threo-syringylglycerol Ether	Negative	439.16	195.07	440.1682	C21H28O10	[M-H]-	Lignans and Coumarins	1313434-74-0
3-[(2S,3S)-2-(4-hydroxy-3-methoxyphenyl)-7-methoxy-3-methyl-2,3-dihydro-1-benzofuran-5-yl]prop-2-enal	Negative	339.12	309.08	340.1311	C20H20O5	[M-H]-	Phenolic acids	-
N-(1-Deoxy-1-fructosyl)Valine	Positive	280.14	216.12	279.1318	C11H21NO7	[M+H]+	Amino acids and derivatives	-
2-Aminotetradecane-1,5,13-triol	Positive	262.24	200.2	261.2304	C14H31NO3	[M+H]+	Lipids	-
2-Aminohexadecane-1,5,15-triol	Positive	290.27	228.23	289.2617	C16H35NO3	[M+H]+	Lipids	-
2-Aminotetradecan-1-ol*	Positive	230.25	62.06	229.2406	C14H31NO	[M+H]+	Lipids	-
2-Aminooctadecane-1,16,18,18-tetraol	Positive	334.3	242.25	333.2879	C18H39NO4	[M+H]+	Lipids	-
2-Aminohexadecane-1,16,16-triol	Positive	290.27	242.25	289.2617	C16H35NO3	[M+H]+	Lipids	-
o-Carboxy-5-hydroxytryptamine	Positive	221.09	130.06	220.0848	C11H12N2O3	[M+H]+	Alkaloids	-
1,3-dihydroxy-2,3,3a,4-tetrahydropyrrolo[2,1-b]quinazolin-9(1H)-one	Positive	221.09	175.09	220.0848	C11H12N2O3	[M+H]+	Alkaloids	-
N(2)-methylharmine	Positive	227.12	212.09	226.1106	C14H14N2O	[M+H]+	Alkaloids	6519-18-2
6-Hydroxy-4-(4-hydroxy-3-methoxyphenyl)-7-methoxy-naphtho[2,3-c]furan-1,3-dione-1	Negative	365.06	167.03	366.074	C20H14O7	[M-H]-	Lignans and Coumarins	-
Kobusone	Negative	221.16	221.15	222.162	C14H22O2	[M-H]-	Terpenoids	24173-71-5
2,3,23-Trihydroxyurs-12-en-28-oic acid*	Negative	487.34	487.34	488.3502	C30H48O5	[M-H]-	Terpenoids	-
Α-hydroxyquinoline	Positive	146.06	118.06	145.0528	C9H7NO	[M+H]+	Alkaloids	-
Methyl Hydroxycinnamate	Positive	179.07	119.05	178.063	C10H10O3	[M+H]+	Phenolic acids	80540-55-2
[(1R,2S)-1-(1,3-benzodioxol-5-yl)-2-methyl-3-oxobutyl]4-hydroxy-3-methoxybenzoate	Positive	373.13	343.08	372.1209	C20H20O7	[M+H]+	Lignans and Coumarins	-
5-[(2r,3s,4s,5s)-5-(2h-1,3-benzodioxol-5-yl)-3,4-dimethyloxolan-2-yl]-2-methoxyphenol*	Positive	343.15	163.07	342.1467	C20H22O5	[M+H]+	Lignans and Coumarins	-
2-[(1R)-1-carboxyethoxy]propanoic acid	Positive	163.06	69.03	162.0528	C6H10O5	[M+H]+	Organic acids	-
Gamma-Glu-Phe*	Positive	295.13	120.08	294.1216	C14H18N2O5	[M+H]+	Amino acids and derivatives	7432-24-8
N-Fructosyl Pyroglutamate	Negative	290.09	128.04	291.0954	C11H17NO8	[M-H]-	Amino acids and derivatives	-
2,5-Dihydroxybenzoic acid-5-O-glucoside	Negative	315.07	153.02	316.0794	C13H16O9	[M-H]-	Phenolic acids	-
5-methylfurfural	Positive	111.04	55.05	110.0368	C6H6O2	[M+H]+	Others	620-02-0
Lauramine oxide	Positive	230.25	57.07	229.2406	C14H31NO	[M+H]+	Others	1643-20-5
Tetradecasphinganine	Positive	246.24	88.08	245.2355	C14H31NO2	[M+H]+	Others	-
Lauryldiethanolamine	Positive	274.28	88.08	273.2668	C16H35NO2	[M+H]+	Others	1541-67-9
Octadeca-9,12,15-trienoic acid	Positive	279.23	81.07	278.2246	C18H30O2	[M+H]+	Lipids	28290-79-1
1-Monolinolenoyl-Rac-Glycerol*	Positive	353.27	261.22	352.2614	C21H36O4	[M+H]+	Lipids	18465-99-1
Octadeca-2,9,12,15-tetraen-1-ol	Positive	263.24	81.07	262.2297	C18H30O	[M+H]+	Others	-
2,3-Dihydroxy-1-(4'-hydroxy-3'-methoxyphenyl)-propan-1-one	Negative	211.06	148.02	212.0685	C10H12O5	[M-H]-	Others	-
3,3-bis-(4-hydroxy-3-methoxyphenyl)-propane-1,2-diol	Negative	319.12	241.05	320.126	C17H20O6	[M-H]-	Others	-
Coumaroyl Quinic Acid	Negative	337.09	191.06	338.1002	C16H18O8	[M-H]-	Others	-
Sulfo jasmonate	Negative	305.07	96.96	306.0773	C12H18O7S	[M-H]-	Others	-
N-Methylpyrrolidone	Positive	100.08	58.03	99.0684	C5H9NO	[M+H]+	Others	872-50-4
5-hydroxyindene-1,3-dione	Positive	163.04	133.03	162.0317	C9H6O3	[M+H]+	Terpenoids	131977-61-2
Tetradecyldiethanolamine	Positive	302.3	88.08	301.2981	C18H39NO2	[M+H]+	Alkaloids	18924-66-8
Methyl 3-O-glucosyl-4-hydroxybenzoate	Negative	329.09	167.03	330.0951	C14H18O9	[M-H]-	Phenolic acids	155112-92-8
3-hydroxy-2-methyl-2-prop-2-enyl-3H-inden-1-one	Positive	203.11	185.1	202.0994	C13H14O2	[M+H]+	Others	-
Juglanoside E	Negative	355.11	193.05	356.1107	C16H20O9	[M-H]-	Others	-
9-[(2S,3S,4S,5R)-3,4-dihydroxy-5-(hydroxymethyl)oxolan-2-yl]-1H-purin-6-one	Positive	269.09	137.05	268.0808	C10H12N4O5	[M+H]+	Alkaloids	-
Asiaticumine A	Positive	284.1	152.06	283.0845	C16H13NO4	[M+H]+	Alkaloids	-
9-Alpha-Ribofuranosyladenine*	Positive	268.1	136.06	267.0968	C10H13N5O4	[M+H]+	Nucleotides and derivatives	-
8-hydroxyquinoline	Positive	146.06	91.05	145.0528	C9H7NO	[M+H]+	Alkaloids	148-24-3
(3,7-dimethyl-11-oxododeca-2,6-dienyl)acetate	Negative	265.18	205.16	266.1882	C16H26O3	[M-H]-	Others	-
Methyl (4E,6E,8E,10E,13Z,18E)-5,7,9,11,13,16,17-heptamethylicosa-4,6,8,10,13,18-hexaenoate	Negative	411.33	205.16	412.3341	C28H44O2	[M-H]-	Others	-
4-[3-(4,8-dimethylnona-3,7-dienyl)-3-methyloxiran-2-yl]butan-2-one	Negative	277.22	277.22	278.2246	C18H30O2	[M-H]-	Others	-
(3b,16a,20R)-25-Acetoxy-3,16,20,22-tetrahydroxy-5-cucurbiten-11-one 3-glucoside	Negative	709.42	487.34	710.4241	C38H62O12	[M-H]-	Steroids	-
N-(p-hydroxybenzyl) adenosine	Positive	404.15	207.06	403.1492	C18H21N5O6	[M+H]+	Nucleotides and derivatives	-
3β,14β-dihydroxy-pregn-5-en-20-one	Positive	333.24	279.23	332.2351	C21H32O3	[M+H]+	Steroids	-
2,5-bis(hydroxymethyl)-2-methoxyoxolane-3,4-diol*	Negative	193.07	59.01	194.079	C7H14O6	[M-H]-	Others	-
2,5-Dimethoxybenzoquinone*	Positive	169.05	65.04	168.0423	C8H8O4	[M+H]+	Quinones	3117-03-1
1,3,6,7-Tetrahydroxyxanthone	Negative	259.03	259.03	260.0321	C13H8O6	[M-H]-	Flavonoids	-
2,4,2',4'-tetrahydroxy-3'-prenylchalcone	Positive	341.14	137.06	340.1311	C20H20O5	[M+H]+	Flavonoids	-
Dehydrovomifoliol	Negative	221.12	177.13	222.1256	C13H18O3	[M-H]-	Terpenoids	15764-81-5
Kaempferol-4'-O-glucoside*	Positive	449.11	287.06	448.1006	C21H20O11	[M+H]+	Flavonoids	52222-74-9
Myrtucommulone B	Positive	415.21	119.09	414.2042	C24H30O6	[M+H]+	Others	54247-23-3
3-hydroxy-1-methylpyrrolidin-2-one*	Positive	116.07	70.06	115.0633	C5H9NO2	[M+H]+	Alkaloids	132996-63-5
2-((4,5-dihydroxy-2-(4-(3-(hydroxymethyl)-5-(2-hydroxyvinyl)-7-methoxy-2,3-dihydrobenzofuran-2-yl)-2-methoxyphenoxy)tetrahydro-2H-pyran-3-yl)oxy)tetrahydro-2H-pyran-3,4,5-triol	Negative	607.21	265.09	608.2105	C29H36O14	[M-H]-	Lignans and Coumarins	-
4-O-(3'-O-alpha-D-Glucopyranosyl)caffeoylquinic acid	Negative	515.14	191.06	516.1479	C22H28O14	[M-H]-	Phenolic acids	1401352-63-3
N-Methyl-L-proline	Positive	130.09	84.08	129.079	C6H11NO2	[M+H]+	Amino acids and derivatives	475-11-6
Oleamide (9-Octadecenamide)	Positive	282.28	247.24	281.2719	C18H35NO	[M+H]+	Lipids	301-02-0
Dihydrodehydrodiconiferyl alcohol	Positive	361.17	135.08	360.1573	C20H24O6	[M+H]+	Lignans and Coumarins	126253-41-6
Salidroside	Negative	299.11	137.02	300.1209	C14H20O7	[M-H]-	Phenolic acids	10338-51-9
Rugosic acid A	Negative	281.14	123.08	282.1467	C15H22O5	[M-H]-	Others	-
Pipecolic acid	Positive	130.1	56.05	129.079	C6H11NO2	[M+H]+	Alkaloids	535-75-1
Hydroperoxylinoleic acid*	Negative	311.22	223.17	312.2301	C18H32O4	[M-H]-	Lipids	34444-18-3
Quercetin 3-O-glucoside 7-O-xyloside	Positive	597.15	303.05	596.1377	C26H28O16	[M+H]+	Flavonoids	-
2-Hydroxy-2,3-dihydronaphthalene-1,4-dione	Positive	177.05	131.05	176.0473	C10H8O3	[M+H]+	Quinones	63534-43-0
3,4-Methylenedioxycinnamaldehyde	Positive	177.05	149.02	176.0473	C10H8O3	[M+H]+	Others	58095-77-5
N-Isobutyl Decanamide	Positive	228.23	228.24	227.2249	C14H29NO	[M+H]+	Alkaloids	73785-31-6
2,2-dimethylchromene-6-carboxylic acid*	Positive	205.09	149.02	204.0786	C12H12O3	[M+H]+	Others	34818-56-9
Octadecadienamide	Positive	280.26	81.07	279.2562	C18H33NO	[M+H]+	Alkaloids	-
Octadec-2-enamide	Positive	282.28	69.07	281.2719	C18H35NO	[M+H]+	Alkaloids	-
3',4',5',5,7-Pentamethoxyflavone*	Positive	373.13	343.08	372.1209	C20H20O7	[M+H]+	Flavonoids	53350-26-8
4-caffeoylshikimic acid	Negative	335.08	179.03	336.0845	C16H16O8	[M-H]-	Phenolic acids	-
glycoric acid	Negative	227.13	183.14	228.1362	C12H20O4	[M-H]-	Others	-
Isopimaric acid*	Negative	301.22	301.22	302.2246	C20H30O2	[M-H]-	Terpenoids	5835-26-7
cyclo-(Gly-Phe)	Positive	205.1	146.06	204.0899	C11H12N2O2	[M+H]+	Amino acids and derivatives	10125-07-2
3-Benzoyl-ShikimicAcid	Negative	277.074	137.027	278.079	C14H14O6	[M-H]-	Organic acids	-
3'-p-Coumaroyl-sucrose	Negative	487.15	145.03	488.153	C21H28O13	[M-H]-	Phenolic acids	-
3-(Hydroxycinnamoyl)-quinic acid*	Negative	337.09	163.04	338.1002	C16H18O8	[M-H]-	Phenolic acids	-
Hesperetin-3'-O-glucoside	Positive	465.14	303.09	464.1319	C22H24O11	[M+H]+	Flavonoids	-
1-O-rhamnose-3-O-Caffeoyl Quinic Acid	Negative	499.15	191.06	500.1554	C22H28O13	[M-H]-	Phenolic acids	-
1'-(3-methylisobutyryl)sucrose	Negative	485.19	341.11	426.1737	C17H30O12	[M+CH3COOH-H]-	Lipids	-
3-pyridine-methanol-O-β-D-glucopyranosyl*	Positive	272.11	110.06	271.1056	C12H17NO6	[M+H]+	Alkaloids	-
Cyanidin-3-O-glucoside*	Positive	449.108	287.055	449.1078	C21H21O11+	[M]+	Flavonoids	47705-70-4
Kaempferol-3-O-robinobioside(Biorobin)*	Positive	595.17	287.06	594.1585	C27H30O15	[M+H]+	Flavonoids	17297-56-2
3'-methoxyquercetin-3-O-L-rhamnosyl(1→2)-glucopyranoside*	Positive	625.17	317.07	624.169	C28H32O16	[M+H]+	Flavonoids	-
Cyanidin-3-O-galactoside*	Positive	449.109	287.055	449.1078	C21H21O11+	[M]+	Flavonoids	142506-26-1
Limocitrin-7-O-rutinoside*	Positive	655.19	347.07	654.1796	C29H34O17	[M+H]+	Flavonoids	-
Limocitrin-7-O-glucoside*	Positive	509.13	347.07	508.1217	C23H24O13	[M+H]+	Flavonoids	-
Isorhamnetin-3-O-rutinoside-7-O-rhamnoside	Positive	771.23	317.07	770.2269	C34H42O20	[M+H]+	Flavonoids	-
Isorhamnetin-3-O-rutinoside*	Positive	625.18	317.07	624.169	C28H32O16	[M+H]+	Flavonoids	604-80-8
Isorhamnetin-3-O-Glucoside*	Positive	479.12	317.07	478.1111	C22H22O12	[M+H]+	Flavonoids	5041-82-7
N-succinyl-proline	Negative	214.071	114.059	215.0794	C9H13NO5	[M-H]-	Amino acids and derivatives	-
N-carboxy-N-(2-oxo-2-phenylethyl)-L-alanine	Negative	250.07	88.04	251.0794	C12H13NO5	[M-H]-	Amino acids and derivatives	-
2-amino-3-(1H-pyrazol-1-yl)propanoic acid	Positive	156.08	110.07	155.0695	C6H9N3O2	[M+H]+	Organic acids	2734-48-7
3-(triazan-2-yl)propyl L-prolinate	Positive	203.15	116.07	202.143	C8H18N4O2	[M+H]+	Amino acids and derivatives	-
Tyrosylleucine	Positive	295.16	136.08	294.158	C15H22N2O4	[M+H]+	Amino acids and derivatives	17355-10-1
Ile-Phe	Positive	279.17	86.1	278.163	C15H22N2O3	[M+H]+	Amino acids and derivatives	-
Procyanidin A1	Negative	575.119	285.039	576.1268	C30H24O12	[M-H]-	Tannins	103883-03-0
3'-O-Methyltricetin-5-O-glucoside*	Positive	479.12	317.06	478.1111	C22H22O12	[M+H]+	Flavonoids	-
Quercetin-3-O-(6''-O-arabinosyl)glucoside	Positive	597.14	303.05	596.1377	C26H28O16	[M+H]+	Flavonoids	-
Quercetin-7-O-rutinoside*	Positive	611.16	303.05	610.1534	C27H30O16	[M+H]+	Flavonoids	147714-62-3
3'-O-Methyltricetin-7-O-glucoside*	Positive	479.12	317.07	478.1111	C22H22O12	[M+H]+	Flavonoids	-
Syringetin-3-O-glucoside*	Positive	509.13	347.08	508.1217	C23H24O13	[M+H]+	Flavonoids	40039-49-4
N-(1-deoxy-1-xylosyl)valine	Positive	266.12	116.07	265.1162	C10H19NO7	[M+H]+	Amino acids and derivatives	-
3-(((S)-1-carboxy-2-phenylethyl)amino)-2,5-dihydroxycyclopentane-1-carboxylic acid	Positive	310.13	120.08	309.1212	C15H19NO6	[M+H]+	Others	-
N-methylphenylalanine	Positive	180.1	120.08	179.0946	C10H13NO2	[M+H]+	Amino acids and derivatives	-
Embelin	Negative	293.18	221.15	294.1831	C17H26O4	[M-H]-	Quinones	550-24-3
Retronecine	Positive	156.1	110.07	155.0946	C8H13NO2	[M+H]+	Alkaloids	480-85-3
tetrahydrochromone M	Positive	343.15	163.07	342.1467	C20H22O5	[M+H]+	Others	-
Pyridine-4-formyl-O-β-D-glucopyranoside*	Positive	286.09	124.04	285.0849	C12H15NO7	[M+H]+	Others	-
3-Hydroxy-23-oxoolean-12-en-28-oic acid (Gypsogenin)	Positive	471.35	425.34	470.3396	C30H46O4	[M+H]+	Terpenoids	-
3-Hydroxyolean-12-ene-28,29-dioic acid (Serratagenic Acid)	Positive	487.34	451.32	486.3345	C30H46O5	[M+H]+	Terpenoids	-
2-hydroxy-2-isobutylsuccinic acid	Negative	189.08	129.06	190.0841	C8H14O5	[M-H]-	Others	-
Senkyunolide B*	Positive	205.09	149.02	204.0786	C12H12O3	[M+H]+	Others	93236-67-0
Aloe-Emodin-9-Anthrone	Negative	255.07	213.06	256.0736	C15H12O4	[M-H]-	Quinones	6247-99-0
Arginine methyl ester*	Positive	189.14	70.07	188.1273	C7H16N4O2	[M+H]+	Amino acids and derivatives	-
S-Methyl-L-cysteine	Positive	136.04	91.05	135.0354	C4H9NO2S	[M+H]+	Amino acids and derivatives	1187-84-4
γ-Glutamyltyrosine	Positive	311.12	165.05	310.1165	C14H18N2O6	[M+H]+	Amino acids and derivatives	7432-23-7
L-γ-Glutamyl-L-leucine	Positive	261.14	86.1	260.1372	C11H20N2O5	[M+H]+	Amino acids and derivatives	2566-39-4
D-Ribose	Negative	149.05	75.01	150.0528	C5H10O5	[M-H]-	Others	50-69-1
3-Phospho-D-glyceric acid	Negative	184.98	78.96	185.9929	C3H7O7P	[M-H]-	Others	820-11-1
2-Propylmalic Acid*	Negative	175.06	115.04	176.0685	C7H12O5	[M-H]-	Organic acids	-
N-Acetyl-L-phenylalanine	Negative	206.08	58.03	207.0895	C11H13NO3	[M-H]-	Amino acids and derivatives	2018-61-3
12-Oxo-10E-Dodecenoic Acid	Negative	211.13	183.14	212.1412	C12H20O3	[M-H]-	Lipids	65410-38-0
Methyl 4-hydroxybenzoate	Negative	151.04	136.02	152.0473	C8H8O3	[M-H]-	Phenolic acids	99-76-3
1-phenyl-7-(4-hydroxyphenyl)-4-ene-3-heptanone	Positive	281.15	107.05	280.1463	C19H20O2	[M+H]+	Others	-
Okanin-4'-(6''-O-acetyl)glucoside*	Positive	509.13	347.08	508.1217	C23H24O13	[M+H]+	Flavonoids	-
Syringic acid 4-O-rhamnoside	Negative	343.1	197.05	344.1107	C15H20O9	[M-H]-	Lignans and Coumarins	-
4-O-Glucosyl-4-hydroxybenzoic acid	Negative	299.08	137.02	300.0845	C13H16O8	[M-H]-	Phenolic acids	-
6-O-Caffeoyl-D-glucose	Negative	341.09	179.03	342.0951	C15H18O9	[M-H]-	Phenolic acids	-
1-O-Salicyloyl-β-D-glucose	Negative	299.08	137.02	300.0845	C13H16O8	[M-H]-	Phenolic acids	60517-74-0
4-O-Glucosyl-sinapate	Negative	385.11	223.06	386.1213	C17H22O10	[M-H]-	Phenolic acids	-
p-Coumaric acid-4-O-glucoside*	Negative	325.09	163.04	326.1002	C15H18O8	[M-H]-	Phenolic acids	117405-48-8
Gossypetin-7-O-rhamnoside; Rhodiolgin	Positive	465.1	303.05	464.0955	C21H20O12	[M+H]+	Flavonoids	94696-39-6
N-Monomethyl-L-arginine*	Positive	189.13	70.07	188.1273	C7H16N4O2	[M+H]+	Amino acids and derivatives	17035-90-4
Pyridoxal	Positive	168.06	150.05	167.0582	C8H9NO3	[M+H]+	Others	66-72-8
Vidarabine	Positive	268.11	136.06	267.0968	C10H13N5O4	[M+H]+	Nucleotides and derivatives	5536-17-4
5,7,3',4',5'-Pentahydroxyflavan (Tricetiflavan)	Positive	291.09	139.04	290.079	C15H14O6	[M+H]+	Flavonoids	-
5,6,3',4'-Tetrahydroxy-3,7-dimethoxyflavone-6-O-glucoside*	Positive	509.13	347.08	508.1217	C23H24O13	[M+H]+	Flavonoids	-
5,6,3',4'-Tetrahydroxy-3,7-dimethoxyflavone	Positive	347.07	315.06	346.0689	C17H14O8	[M+H]+	Flavonoids	-
2-Amino-3,4-dihydroxybutanoic acid-3-O-arabinoside	Positive	268.1	136.06	267.0954	C9H17NO8	[M+H]+	Amino acids and derivatives	-
4-methyl-1,5,2,3-dioxadiazinan-2-amine	Positive	120.08	77.04	119.0695	C3H9N3O2	[M+H]+	Nucleotides and derivatives	-
(3-(carboxyamino)-2-methylpropanoyl)phenylalanine*	Positive	295.13	120.08	294.1216	C14H18N2O5	[M+H]+	Amino acids and derivatives	-
D-Galactaric acid	Negative	209.03	85.03	210.0376	C6H10O8	[M-H]-	Others	526-99-8
Cornusoside A	Negative	375.13	153.06	376.1369	C16H24O10	[M-H]-	Others	-
9-Arabinosyladenine*	Positive	268.11	136.07	267.0968	C10H13N5O4	[M+H]+	Nucleotides and derivatives	-
2,6-Dimethoxy-1,4-benzoquinone*	Positive	169.05	65	168.0423	C8H8O4	[M+H]+	Quinones	530-55-2
N-Acetylisatin	Negative	188.04	144.05	189.0426	C10H7NO3	[M-H]-	Alkaloids	574-17-4
Luteolin-7,3'-di-O-glucoside	Positive	611.16	287.06	610.1534	C27H30O16	[M+H]+	Flavonoids	52187-80-1
N-α-Acetyl-L-ornithine	Negative	173.11	131.08	174.1004	C7H14N2O3	[M-H]-	Amino acids and derivatives	6205-08-9
Isocitric Acid	Negative	191.02	111.01	192.027	C6H8O7	[M-H]-	Organic acids	320-77-4
2-Hydroxyphenylacetic acid	Negative	151.04	107.05	152.0473	C8H8O3	[M-H]-	Organic acids	614-75-5
Trimethyllysine	Positive	189.16	84.08	188.1525	C9H20N2O2	[M+H]+	Amino acids and derivatives	23284-33-5
Selagin	Positive	317.06	302.04	316.0583	C16H12O7	[M+H]+	Flavonoids	-
