# Supplementary material for: Determination of metabolite differences between loquat nectar and honey by UPLC-MS/MS
Source: PeerJ journal article supplement (doi:10.7717/peerj.19988), 2025-09-16
Supplement: Table_S3.xlsx [file Table_S3.xlsx]

## Sheet: Sheet1
Index	Q1 (Da)	Q3 (Da)	Molecular weight (Da)	Formula	Ionization model	Compounds	物质	Class I	物质一级分类	Class II	物质二级分类	CAS	Level	DHPHM-1	DHPHM-2	DHPHM-3	DHPFM-1	DHPFM-2	DHPFM-3	QC01	QC02	QC03	cpd_ID	kegg_map
pme2954	303.05	137.02	302.043	C15H10O7	[M+H]+	Quercetin	槲皮素	Flavonoids	黄酮	Flavonols	黄酮醇	117-39-5	3	102167	107966	125135	55806	49839.1	35676.7	130385	113208	113752	C00389	ko00941,ko00944,ko01100,ko01110
MWSHY0067	611.16	303.05	610.153	C27H30O16	[M+H]+	Quercetin-3-O-rutinoside (Rutin)*	槲皮素-3-O-芸香糖苷 (芦丁)*	Flavonoids	黄酮	Flavonols	黄酮醇	153-18-4	3	130706	100033	199692	42475.8	34269.3	40439.5	61669.8	76810.1	51216.2	C05625	ko00944,ko01100,ko01110
mws0036	609.18	301.09	610.19	C28H34O15	[M-H]-	Hesperetin-7-O-rutinoside (Hesperidin)	橙皮素-7-O-芸香糖苷 (橙皮苷)	Flavonoids	黄酮	Flavanones	二氢黄酮	520-26-3	3	69426.9	95731.5	68404	51346.7	52447.5	42894.3	85661.2	74544.2	34298.2	C09755	-
mws0054	289.07	245.08	290.079	C15H14O6	[M-H]-	Catechin	儿茶素	Flavonoids	黄酮	Flavanols	黄烷醇类	154-23-4	3	50930.3	36183.2	50022.8	22821	14697.1	29254.5	42217.6	44143.4	29431.8	C06562	ko00941,ko01110
MWSHY0104	449.11	287.06	448.101	C21H20O11	[M+H]+	Luteolin-7-O-glucoside (Cynaroside)*	木犀草素-7-O-葡萄糖苷 (木犀草苷)*	Flavonoids	黄酮	Flavones	黄酮	5373-11-5	2	460943	269638	367803	71936.1	22397.9	65172.5	136782	125808	157196	C03951	ko00944
mws0055	373.13	343.09	372.121	C20H20O7	[M+H]+	Tangeretin (4',5,6,7,8-Pentamethoxyflavone)*	桔皮素 (4',5,6,7,8-五甲氧基黄酮)*	Flavonoids	黄酮	Flavones	黄酮	481-53-8	1	50621.5	82247.8	46555	55431.1	32832.9	14738.3	45206.9	54607.7	39540.7	C10190	-
pme3514	301.04	151	302.043	C15H10O7	[M-H]-	Morin*	桑色素*	Flavonoids	黄酮	Flavonols	黄酮醇	480-16-0	3	11526	18951.2	9579.32	91189.2	70455.7	84353.7	78743.7	98707.4	105438	C10105	-
Hmcp003223	347.07	332.05	346.069	C17H14O8	[M+H]+	Limocitrin (5,7,4'-trihydroxy-8,3'-dimethoxyflavone)	柠檬素	Flavonoids	黄酮	Flavonols	黄酮醇	489-33-8	3	9465.51	12343.6	10596	15082.4	43418.7	36091	9237.26	7661.52	6311.87	-	-
pme0241	123.04	79.05	122.037	C7H6O2	[M+H]+	Benzoic acid	苯甲酸	Phenolic acids	酚酸类	Phenolic acids	酚酸类	65-85-0	3	794305	917290	771953	105578	92399.1	63074.6	559209	438909	453796	C00180	ko00996,ko01100,ko01110
mws0014	193.05	134.04	194.058	C10H10O4	[M-H]-	Ferulic acid*	阿魏酸*	Phenolic acids	酚酸类	Phenolic acids	酚酸类	537-98-4	1	1.03254e+06	942837	1.03813e+06	35591.5	54680.9	51970.8	292655	277722	358282	C01494	ko00940,ko01100,ko01110
mws0178	353.09	191.06	354.095	C16H18O9	[M-H]-	Chlorogenic acid (3-O-Caffeoylquinic acid)*	绿原酸 (3-O-咖啡酰奎宁酸)*	Phenolic acids	酚酸类	Phenolic acids	酚酸类	327-97-9	1	3.18778e+07	2.41228e+07	3.67444e+07	766498	825450	860020	1.792e+07	1.61749e+07	1.53236e+07	C00852	ko00940,ko00941,ko00945,ko01110
mws0180	153.019	109.029	154.027	C7H6O4	[M-H]-	2,5-Dihydroxybenzoic acid; Gentisic Acid*	2,5-二羟基苯甲酸; 龙胆酸*	Phenolic acids	酚酸类	Phenolic acids	酚酸类	490-79-9	3	258701	213058	332490	79121	103427	87167.1	158428	127439	145742	C00628	ko00350,ko01100
mws0028	167.03	108.02	168.042	C8H8O4	[M-H]-	Vanillic acid	香草酸	Phenolic acids	酚酸类	Phenolic acids	酚酸类	121-34-6	1	472069	340659	491831	38039.6	29058.3	32378.1	197219	170293	176933	C06672	-
mws2212	179.03	135.05	180.042	C9H8O4	[M-H]-	Caffeic acid	咖啡酸	Phenolic acids	酚酸类	Phenolic acids	酚酸类	331-39-5	3	180188	117549	173587	78476.5	94017.1	104787	87348.5	124372	158829	C01197	ko00940,ko01100,ko01110
mws2213	147.05	103.06	148.052	C9H8O2	[M-H]-	Cinnamic acid	肉桂酸	Phenolic acids	酚酸类	Phenolic acids	酚酸类	140-10-3	1	81667.8	159238	90171.5	9213.11	13848.9	10823.2	46238	53353.2	60263.9	C00423	ko00130,ko00360,ko00940,ko00996,ko00999,ko01100,ko01110
mws0183	153.02	109.03	154.027	C7H6O4	[M-H]-	3,4-Dihydroxybenzoic acid (Protocatechuic acid)*	3,4-二羟基苯甲酸; 原儿茶酸*	Phenolic acids	酚酸类	Phenolic acids	酚酸类	99-50-3	3	514925	498818	796168	141715	166309	166543	277964	322970	268779	C00230	ko00400,ko01100,ko01110
pme1439	165.05	119.05	164.047	C9H8O3	[M+H]+	p-Coumaric acid	对香豆酸	Phenolic acids	酚酸类	Phenolic acids	酚酸类	501-98-4	2	178670	749375	317199	96345.1	110780	281719	387065	328172	329619	C00811	ko00130,ko00350,ko00940,ko00950,ko01100,ko01110
pme0008	176.1	113.07	175.096	C6H13N3O3	[M+H]+	L-Citrulline	L-瓜氨酸	Amino acids and derivatives	氨基酸及其衍生物	Amino acids and derivatives	氨基酸及其衍生物	372-75-8	3	599940	729708	959494	81979	87959.4	108310	500926	463124	518342	C00327	ko00220,ko01100,ko01110,ko01230
pme2527	133.1	116.07	132.09	C5H12N2O2	[M+H]+	L-Ornithine	L-鸟氨酸	Amino acids and derivatives	氨基酸及其衍生物	Amino acids and derivatives	氨基酸及其衍生物	70-26-8	3	7.7515e+06	7.86252e+06	9.23443e+06	1.51968e+06	1.4296e+06	1.32526e+06	8.47787e+06	7.20706e+06	5.9819e+06	C00077	ko00220,ko00330,ko00470,ko00480,ko01100,ko01110,ko01210,ko01230,ko02010
pme0006	116.07	70.07	115.063	C5H9NO2	[M+H]+	L-Proline	L-脯氨酸	Amino acids and derivatives	氨基酸及其衍生物	Amino acids and derivatives	氨基酸及其衍生物	147-85-3	1	6.68499e+07	5.97689e+07	6.19715e+07	3.84441e+07	3.97996e+07	4.04709e+07	5.09931e+07	5.90407e+07	5.16175e+07	C00148	ko00330,ko00332,ko00470,ko00970,ko01100,ko01110,ko01230,ko02010
mws0282	203.08	116.05	204.09	C11H12N2O2	[M-H]-	L-Tryptophan	L-色氨酸	Amino acids and derivatives	氨基酸及其衍生物	Amino acids and derivatives	氨基酸及其衍生物	73-22-3	1	526334	434025	478955	93771.7	85694	66660.2	392755	322236	219711	C00078	ko00260,ko00380,ko00400,ko00901,ko00966,ko00970,ko00996,ko00999,ko01100,ko01110,ko01210,ko01230,ko01240
mws0256	118.09	72.08	117.079	C5H11NO2	[M+H]+	L-Valine	L-缬氨酸	Amino acids and derivatives	氨基酸及其衍生物	Amino acids and derivatives	氨基酸及其衍生物	72-18-4	1	8.79904e+06	6.78874e+06	7.96134e+06	2.9208e+06	2.58654e+06	3.97768e+06	8.95023e+06	7.37957e+06	6.17661e+06	C00183	ko00280,ko00290,ko00460,ko00770,ko00966,ko00970,ko01100,ko01110,ko01210,ko01230,ko01240,ko02010
MWSmce609	134.04	74.02	133.037	C4H7NO4	[M+H]+	L-Aspartic acid	L-天冬氨酸	Amino acids and derivatives	氨基酸及其衍生物	Amino acids and derivatives	氨基酸及其衍生物	56-84-8	3	1.83282e+06	2.09836e+06	2.36852e+06	386413	394316	472321	1.82637e+06	1.85229e+06	1.40982e+06	C00049	ko00220,ko00250,ko00260,ko00261,ko00270,ko00300,ko00340,ko00410,ko00460,ko00470,ko00710,ko00760,ko00770,ko00970,ko00999,ko01100,ko01110,ko01200,ko01210,ko01230,ko01240,ko02010
pme0021	166.09	120.08	165.079	C9H11NO2	[M+H]+	L-Phenylalanine	L-苯丙氨酸	Amino acids and derivatives	氨基酸及其衍生物	Amino acids and derivatives	氨基酸及其衍生物	63-91-2	1	2.78809e+07	3.02848e+07	2.85133e+07	3.58647e+07	3.4059e+07	2.17515e+07	2.46133e+07	3.00388e+07	2.11657e+07	C00079	ko00360,ko00400,ko00460,ko00470,ko00940,ko00960,ko00966,ko00970,ko00996,ko00999,ko01100,ko01110,ko01210,ko01230,ko02010
pme0193	147.08	84.04	146.069	C5H10N2O3	[M+H]+	L-Glutamine	L-谷氨酰胺	Amino acids and derivatives	氨基酸及其衍生物	Amino acids and derivatives	氨基酸及其衍生物	56-85-9	2	2.28948e+07	1.73504e+07	2.08668e+07	3.93531e+07	4.69397e+07	4.28013e+07	4.41038e+07	3.54783e+07	2.21808e+07	C00064	ko00220,ko00230,ko00240,ko00250,ko00470,ko00630,ko00750,ko00910,ko00970,ko01100,ko01230,ko01232,ko01240,ko02010
pme0026	147.11	84.08	146.106	C6H14N2O2	[M+H]+	L-Lysine	L-赖氨酸	Amino acids and derivatives	氨基酸及其衍生物	Amino acids and derivatives	氨基酸及其衍生物	56-87-1	1	2.02552e+07	1.91319e+07	1.79882e+07	4.69332e+07	4.77601e+07	4.47961e+07	4.4486e+07	2.0472e+07	2.13277e+07	C00047	ko00300,ko00310,ko00470,ko00780,ko00960,ko00970,ko01100,ko01110,ko01210,ko01230,ko02010
Lmsn000381	341.109	89.0244	342.116	C12H22O11	[M-H]-	D-Maltose*	D-麦芽糖*	Others	其它类	Saccharides	糖类	69-79-4	1	1.08703e+07	8.27655e+06	7.39113e+06	8944530	4.06007e+06	9.50484e+06	9.20329e+06	8.23035e+06	7.69237e+06	C01971	-
mws1164	179.056	59.0139	180.063	C6H12O6	[M-H]-	D-Fructose*	D-果糖*	Others	其它类	Saccharides	糖类	57-48-7	1	2.01077e+07	1.38925e+07	1.53022e+07	2.86399e+07	3.2971e+07	2.00251e+07	2.28615e+07	1.96186e+07	1.71495e+07	C05003	-
pmf0139	179.06	59.01	180.063	C6H12O6	[M-H]-	D-Galactose*	D-半乳糖*	Others	其它类	Saccharides	糖类	59-23-4	1	5.44932e+06	6.31232e+06	3.5411e+06	4.90813e+06	8.95313e+06	1.83335e+06	1.14483e+07	1.38873e+07	1.44346e+07	C00124	ko00052,ko01100
Zmgn000173	149.05	75.01	150.053	C5H10O5	[M-H]-	D-Ribose	D-核糖	Others	其它类	Saccharides	糖类	50-69-1	1	367290	404177	406904	31031.9	16966	44398.5	422693	353234	368757	C00121	ko00030,ko01100,ko02010
Lmmp000647	505.17	145.05	504.169	C18H32O16	[M+H]+	Glucan	葡聚糖	Others	其它类	Saccharides	糖类	9041-22-9	1	2.71219e+06	2.615e+06	2.64907e+06	1.34998e+06	1.15849e+06	1.15104e+06	2.18843e+06	2.74247e+06	2.51672e+06	-	-
MWSmce598	829.28	325.11	828.275	C30H52O26	[M+H]+	Maltopentaose	麦芽五糖	Others	其它类	Saccharides	糖类	34620-76-3	3	650569	595608	738241	255796	327467	295339	447656	693297	617049	-	-
mws4170	179.06	59.01	180.063	C6H12O6	[M-H]-	D-Glucose*	D-葡萄糖*	Others	其它类	Saccharides	糖类	50-99-7	1	5.37672e+06	6.41926e+06	954457	1.10219e+08	9.80491e+07	9.2442e+07	1.87096e+07	1.38852e+07	1.27566e+07	C00031	ko00010,ko00030,ko00052,ko00500,ko00520,ko00524,ko00901,ko01100,ko01110,ko02010
pme2125	503.162	179.055	504.169	C18H32O16	[M-H]-	Raffinose*	棉子糖*	Others	其它类	Saccharides	糖类	512-69-6	1	61801.8	266997	156129	1.37374e+06	1.68462e+06	1.59494e+06	407379	271881	399375	C00492	ko00052,ko01100,ko02010
pmf0138	179.06	59.01	180.063	C6H12O6	[M-H]-	D-Mannose*	甘露糖*	Others	其它类	Saccharides	糖类	3458-28-4	1	1.14733e+07	5.44022e+06	6.51819e+06	1.0039e+08	1.004e+08	1.02213e+08	1.24796e+07	2.00777e+07	1.53423e+07	C00159	ko00051,ko00052,ko00520,ko01100,ko01250,ko02010

## Sheet: 售后所需信息
Table S3 Relative content analysis of compound Rt data.
Compounds	RT (min)	DP	CE
Quercetin	5.1	40	40
Quercetin-3-O-rutinoside (Rutin)*	3.8	50	30
Hesperetin-7-O-rutinoside (Hesperidin)	4.3	-20	-30
Catechin	3	-60	-20
Luteolin-7-O-glucoside (Cynaroside)*	4	50	30
Tangeretin (4',5,6,7,8-Pentamethoxyflavone)*	7.5	20	40
Morin*	5.1	-20	-30
Limocitrin (5,7,4'-trihydroxy-8,3'-dimethoxyflavone)	5.9	50	30
Benzoic acid	4.5	40	20
Ferulic acid*	4	-20	-20
Chlorogenic acid (3-O-Caffeoylquinic acid)*	2.7	-20	-20
2,5-Dihydroxybenzoic acid; Gentisic Acid*	2.6	-50	-30
Vanillic acid	3.3	-40	-30
Caffeic acid	3.4	-20	-20
Cinnamic acid	5.2	-40	-30
3,4-Dihydroxybenzoic acid (Protocatechuic acid)*	2.5	-50	-18
p-Coumaric acid	3.8	20	30
L-Citrulline	0.8	20	20
L-Ornithine	0.7	20	20
L-Proline	0.8	40	20
L-Tryptophan	2.5	-40	-20
L-Valine	0.8	20	20
L-Aspartic acid	0.8	50	30
L-Phenylalanine	1.9	20	20
L-Glutamine	0.7	20	20
L-Lysine	0.7	20	20
D-Maltose*	0.8	-50	-30
D-Fructose*	0.8	-50	-30
D-Galactose*	0.7	-20	-30
D-Ribose	0.8	-50	-30
Glucan	0.9	50	30
Maltopentaose	0.8	50	30
D-Glucose*	0.8	-50	-30
Raffinose*	0.8	-80	-30
D-Mannose*	0.9	-40	-20
