# Supplementary material for: Determination of metabolite differences between loquat nectar and honey by UPLC-MS/MS
Source: PeerJ journal article supplement (doi:10.7717/peerj.19988), 2025-09-16
Supplement: Table_S4.xlsx [file Table_S4.xlsx]

## Sheet: Sheet1
Table S4 Classes of non-volatile metabolites in DHPHM and DHPFM.
No.	Q1 (Da)	Q3 (Da)	Molecular Weight (Da)	Formula	Ionization model	Compounds	Class I	Class II	CAS
1	231.11	158.1	230.106	C13H14N2O2	[M+H]+	(1S,3S)-1-Methyl-1,2,3,4-tetrahydro-β-carboline-3-carboxylic acid	Alkaloids	Alkaloids	40678-46-4
2	265.18	205.16	266.188	C16H26O3	[M-H]-	(3,7-dimethyl-11-oxododeca-2,6-dienyl)acetate	Others	Others	-
3	295.13	120.08	294.122	C14H18N2O5	[M+H]+	(3-(carboxyamino)-2-methylpropanoyl)phenylalanine*	Amino acids and derivatives	Amino acids and derivatives	-
4	709.42	487.34	710.424	C38H62O12	[M-H]-	(3b,16a,20R)-25-Acetoxy-3,16,20,22-tetrahydroxy-5-cucurbiten-11-one 3-glucoside	Steroids	Steroidal saponins	-
5	493.21	163.08	492.2	C25H32O10	[M+H]+	(7S,8R-Threo-3',4,9'-trihydroxy-3-methoxy-4',7-epoxy-neolignan-9-O-rhamnoside	Lignans and Coumarins	Lignans	-
6	253.22	235.21	254.225	C16H30O2	[M-H]-	(7Z)-Hexadecenoic acid*	Lipids	Free fatty acids	2416-19-5
7	485.19	341.11	426.174	C17H30O12	[M+CH3COOH-H]-	1'-(3-methylisobutyryl)sucrose	Lipids	Free fatty acids	-
8	257.18	195.18	258.183	C14H26O4	[M-H]-	1,14-Tetradecanedioic Acid	Lipids	Free fatty acids	821-38-5
9	259.03	259.03	260.032	C13H8O6	[M-H]-	1,3,6,7-Tetrahydroxyxanthone	Flavonoids	Flavones	-
10	515.12	191.03	516.127	C25H24O12	[M-H]-	1,3-O-Dicaffeoylquinic Acid (Cynarin)	Phenolic acids	Phenolic acids	30964-13-7
11	221.09	175.09	220.085	C11H12N2O3	[M+H]+	1,3-dihydroxy-2,3,3a,4-tetrahydropyrrolo[2,1-b]quinazolin-9(1H)-one	Alkaloids	Alkaloids	-
12	193.09	105.07	192.078	C11H12O3	[M+H]+	1,4-Benzodioxin-6-propanol	Others	Alcohol compounds	-
13	163.06	101.02	164.069	C6H12O5	[M-H]-	1,5-Anhydro-D-glucitol	Others	Saccharides	154-58-5
14	503.12	179.03	504.127	C24H24O12	[M-H]-	1,6-Di-O-caffeoyl-β-D-glucose	Phenolic acids	Phenolic acids	-
15	161.05	71.01	162.053	C6H10O5	[M-H]-	1,6-anhydro-β-D-glucose	Others	Saccharides	498-07-7
16	578.35	279.23	579.354	C28H54NO9P	[M-H]-	1-(2,3-dihydroxypropoxy)-3-(((2-(dimethylamino)ethoxy)(hydroxy)phosphoryl)oxy)propan-2-yl (11Z,14Z)-octadeca-11,14-dienoate	Lipids	LPE	-
17	576.33	277.22	577.338	C28H52NO9P	[M-H]-	1-(2,3-dihydroxypropoxy)-3-(((2-(dimethylamino)ethoxy)(hydroxy)phosphoryl)oxy)propan-2-yl (8E,11Z,14Z)-octadeca-8,11,14-trienoate	Lipids	LPE	-
18	554.35	255.23	555.354	C26H54NO9P	[M-H]-	1-(2,3-dihydroxypropoxy)-3-(((2-(dimethylamino)ethoxy)(hydroxy)phosphoryl)oxy)propan-2-yl palmitate*	Lipids	LPE	-
19	578.34	504.31	519.332	C26H50NO7P	[M+CH3COO]-	1-(9Z,12Z-octadecadienoyl)-sn-glycero-3-phosphocholine	Lipids	LPC	22252-07-9
20	102.06	56.05	101.048	C4H7NO2	[M+H]+	1-Aminocyclopropane-1-carboxylic acid	Organic acids	Organic acids	22059-21-8
21	245.07	113.03	244.07	C9H12N2O6	[M+H]+	1-Arabinosyluracil	Nucleotides and derivatives	Nucleotides and derivatives	3083-77-0
22	353.09	191.06	354.095	C16H18O9	[M-H]-	1-Caffeoylquinic acid	Phenolic acids	Phenolic acids	1241-87-8
23	157.16	157.16	158.167	C10H22O	[M-H]-	1-Decanol*	Others	Alcohol compounds	112-30-1
24	297.32	183.21	298.324	C20H42O	[M-H]-	1-Eicosanol	Lipids	Free fatty acids	629-96-9
25	150.08	133.05	149.07	C6H7N5	[M+H]+	1-Methyladenine	Nucleotides and derivatives	Nucleotides and derivatives	5142-22-3
26	353.27	261.22	352.261	C21H36O4	[M+H]+	1-Monolinolenoyl-Rac-Glycerol*	Lipids	Glycerol ester	18465-99-1
27	303.25	57.07	302.246	C17H34O4	[M+H]+	1-Monomyristin	Lipids	Glycerol ester	589-68-4
28	299.08	137.02	300.084	C13H16O8	[M-H]-	1-O-Salicyloyl-β-D-glucose	Phenolic acids	Phenolic acids	60517-74-0
29	385.11	223.06	386.121	C17H22O10	[M-H]-	1-O-Sinapoyl-β-D-glucose	Phenolic acids	Phenolic acids	-
30	329.11	167.03	330.095	C14H18O9	[M-H]-	1-O-Vanilloyl-D-Glucose	Phenolic acids	Phenolic acids	-
31	325.09	163.04	326.1	C15H18O8	[M-H]-	1-O-p-Coumaroyl-β-D-glucose*	Phenolic acids	Phenolic acids	7139-64-2
32	337.09	163.04	338.1	C16H18O8	[M-H]-	1-O-p-Coumaroylquinic acid*	Phenolic acids	Phenolic acids	-
33	499.15	191.06	500.155	C22H28O13	[M-H]-	1-O-rhamnose-3-O-Caffeoyl Quinic Acid	Phenolic acids	Phenolic acids	-
34	269.29	209.23	270.292	C18H38O	[M-H]-	1-Octadecanol	Lipids	Free fatty acids	112-92-5
35	281.15	107.05	280.146	C19H20O2	[M+H]+	1-phenyl-7-(4-hydroxyphenyl)-4-ene-3-heptanone	Others	Ketone compounds	-
36	353.27	261.22	352.261	C21H36O4	[M+H]+	1-α-Linolenoyl-glycerol*	Lipids	Glycerol ester	-
37	287.22	241.22	288.23	C16H32O4	[M-H]-	10,16-Dihydroxypalmitic acid	Lipids	Free fatty acids	3233-90-7
38	474.17	327.12	473.166	C20H23N7O7	[M+H]+	10-Formyltetrahydrofolic Acid	Alkaloids	Alkaloids	2800-34-2
39	185.12	139.11	186.126	C10H18O3	[M-H]-	10-Hydroxy-2-Decenoic Acid	Lipids	Free fatty acids	14113-05-4
40	187.13	141.13	188.141	C10H20O3	[M-H]-	10-Hydroxydecanoic acid	Lipids	Free fatty acids	1679-53-4
41	303.23	257.22	302.225	C20H30O2	[M+H]+	11β-Hydroxy-8,15-isopimaradiene-4-one	Terpenoids	Ditepenoids	-
42	309.21	171.1	310.214	C18H30O4	[M-H]-	12(13)Ep-9-KODE	Lipids	Free fatty acids	-
43	297.24	183.14	298.251	C18H34O3	[M-H]-	12-Hydroxyoctadec-9-Enoic Acid; Ricinoleic acid	Lipids	Free fatty acids	141-22-0
44	211.13	183.14	212.141	C12H20O3	[M-H]-	12-Oxo-10E-Dodecenoic Acid	Lipids	Free fatty acids	65410-38-0
45	295.23	195.14	296.235	C18H32O3	[M-H]-	13(S)-HODE;13(S)-Hydroxyoctadeca-9Z,11E-dienoic acid*	Lipids	Free fatty acids	10219-69-9
46	293.21	235.17	294.219	C18H30O3	[M-H]-	13-KODE; (9Z,11E)-13-Oxooctadeca-9,11-dienoic acid	Lipids	Free fatty acids	54739-30-9
47	241.22	241.21	242.225	C15H30O2	[M-H]-	13-methylmyristic acid	Lipids	Free fatty acids	2485-71-4
48	288.25	88.08	287.246	C16H33NO3	[M+H]+	14-Amino-15-hydroxy-11-methylpentadecanoic acid	Lipids	Sphingolipids	-
49	471.35	205.16	470.34	C30H46O4	[M+H]+	19-Hydroxy-2-(hydroxymethyl)-A(1)-norursa-2,12-dien-28-oic acid (Coleonolic acid)*	Terpenoids	Triterpene	-
50	301.04	151	302.043	C15H10O7	[M-H]-	2',3',4',5,7-Pentahydroxyflavone*	Flavonoids	Flavones	-
51	136.08	91.06	135.068	C8H9NO	[M+H]+	2'-Aminoacetophenone	Others	Ketone compounds	551-93-9
52	332.08	136.06	331.068	C10H14N5O6P	[M+H]+	2'-Deoxyadenosine-5'-monophosphate	Nucleotides and derivatives	Nucleotides and derivatives	653-63-4
53	268.1	152.06	267.097	C10H13N5O4	[M+H]+	2'-Deoxyguanosine	Nucleotides and derivatives	Nucleotides and derivatives	961-07-9
54	333.06	137.05	332.052	C10H13N4O7P	[M+H]+	2'-Deoxyinosine-5'-monophosphate	Nucleotides and derivatives	Nucleotides and derivatives	3393-18-8
55	282.12	136.06	281.112	C11H15N5O4	[M+H]+	2'-O-Methyladenosine	Nucleotides and derivatives	Nucleotides and derivatives	2140-79-6
56	485.33	485.33	486.334	C30H46O5	[M-H]-	2,19-Dihydroxy-3-oxours-12-en-28-oic acid	Terpenoids	Triterpene	176983-21-4
57	205.09	149.02	204.079	C12H12O3	[M+H]+	2,2-dimethylchromene-6-carboxylic acid*	Others	Others	34818-56-9
58	487.34	469.33	488.35	C30H48O5	[M-H]-	2,3,19-Trihydroxyurs-12-en-28-oic acid (Tormentic acid)	Terpenoids	Triterpene	13850-16-3
59	487.34	487.34	488.35	C30H48O5	[M-H]-	2,3,23-Trihydroxyolean-12-en-28-oic acid*	Terpenoids	Triterpene	-
60	487.34	405.31	486.334	C30H46O5	[M+H]+	2,3,23-Trihydroxyurs-12,19(29)-dien-28-oic acid	Terpenoids	Triterpene	-
61	487.34	487.34	488.35	C30H48O5	[M-H]-	2,3,23-Trihydroxyurs-12-en-28-oic acid*	Terpenoids	Triterpene	-
62	211.06	148.02	212.069	C10H12O5	[M-H]-	2,3-Dihydroxy-1-(4'-hydroxy-3'-methoxyphenyl)-propan-1-one	Others	Others	-
63	153.02	109.03	154.027	C7H6O4	[M-H]-	2,3-Dihydroxybenzoic Acid*	Phenolic acids	Phenolic acids	303-38-8
64	471.35	201.16	470.34	C30H46O4	[M+H]+	2,3-Dihydroxyurs-12,18-dien-28-oic acid (Goreishic Acid I)	Terpenoids	Triterpene	129058-59-9
65	341.14	137.06	340.131	C20H20O5	[M+H]+	2,4,2',4'-tetrahydroxy-3'-prenylchalcone	Flavonoids	Chalcones	-
66	205.16	189.13	206.167	C14H22O	[M-H]-	2,4-Di-Tert-Butylphenol*	Phenolic acids	Phenolic acids	96-76-4
67	151.04	108.02	152.047	C8H8O3	[M-H]-	2,5-Dihydroxyacetophenone	Others	Ketone compounds	490-78-8
68	137.02	93.03	138.032	C7H6O3	[M-H]-	2,5-Dihydroxybenzaldehyde*	Others	Aldehyde compounds	1194-98-5
69	315.07	153.02	316.079	C13H16O9	[M-H]-	2,5-Dihydroxybenzoic acid-5-O-glucoside	Phenolic acids	Phenolic acids	-
70	153.019	109.029	154.027	C7H6O4	[M-H]-	2,5-Dihydroxybenzoic acid; Gentisic Acid*	Phenolic acids	Phenolic acids	490-79-9
71	169.05	65.04	168.042	C8H8O4	[M+H]+	2,5-Dimethoxybenzoquinone*	Quinones	Quinones	3117-03-1
72	193.07	59.01	194.079	C7H14O6	[M-H]-	2,5-bis(hydroxymethyl)-2-methoxyoxolane-3,4-diol*	Others	Saccharides	-
73	289.07	243.07	288.063	C15H12O6	[M+H]+	2,6,7,4'-Tetrahydroxyisoflavanone	Flavonoids	Dihydroisoflavones	-
74	205.16	189.13	206.167	C14H22O	[M-H]-	2,6-Di-tert-butylphenol*	Phenolic acids	Phenolic acids	128-39-2
75	169.05	65	168.042	C8H8O4	[M+H]+	2,6-Dimethoxy-1,4-benzoquinone*	Quinones	Quinones	530-55-2
76	165.06	119.05	166.063	C9H10O3	[M-H]-	2,6-Dimethoxybenzaldehyde	Others	Aldehyde compounds	3392-97-0
77	183.06	165.06	182.058	C9H10O4	[M+H]+	2,6-Dimethoxybenzoic acid	Phenolic acids	Phenolic acids	1466-76-8
78	187.13	97.06	188.141	C10H20O3	[M-H]-	2,6-Dimethyl-7-octene-2,3,6-triol	Others	Alcohol compounds	73815-21-1
79	607.21	265.09	608.211	C29H36O14	[M-H]-	2-((4,5-dihydroxy-2-(4-(3-(hydroxymethyl)-5-(2-hydroxyvinyl)-7-methoxy-2,3-dihydrobenzofuran-2-yl)-2-methoxyphenoxy)tetrahydro-2H-pyran-3-yl)oxy)tetrahydro-2H-pyran-3,4,5-triol	Lignans and Coumarins	Lignans	-
80	578.34	279.23	579.354	C28H54NO9P	[M-H]-	2-(2,3-dihydroxypropoxy)-3-(((2-(dimethylamino)ethoxy)(hydroxy)phosphoryl)oxy)propyl (11Z,14Z)-octadeca-11,14-dienoate	Lipids	LPE	-
81	576.33	277.22	577.338	C28H52NO9P	[M-H]-	2-(2,3-dihydroxypropoxy)-3-(((2-(dimethylamino)ethoxy)(hydroxy)phosphoryl)oxy)propyl (8E,11Z,14Z)-octadeca-8,11,14-trienoate	Lipids	LPE	-
82	554.34	255.23	555.354	C26H54NO9P	[M-H]-	2-(2,3-dihydroxypropoxy)-3-(((2-(dimethylamino)ethoxy)(hydroxy)phosphoryl)oxy)propyl palmitate*	Lipids	LPE	-
83	312.13	180.09	311.123	C12H17N5O5	[M+H]+	2-(Dimethylamino)guanosine*	Nucleotides and derivatives	Nucleotides and derivatives	2140-67-2
84	164.04	120.05	165.043	C8H7NO3	[M-H]-	2-(Formylamino)benzoic acid	Phenolic acids	Phenolic acids	3342-77-6
85	507.17	179.06	448.158	C19H28O12	[M+CH3COOH-H]-	2-(Hydroxymethyl)Phenyl 2-O-Beta-D-Glucopyranosyl-Beta-D-Glucopyranoside	Phenolic acids	Phenolic acids	-
86	145.05	83.05	146.058	C6H10O4	[M-H]-	2-Acetyl-2-Hydroxybutanoic Acid	Organic acids	Organic acids	-
87	330.34	312.33	329.329	C20H43NO2	[M+H]+	2-Amino-1,3-eicosanediol	Others	Alcohol compounds	-
88	268.1	136.06	267.095	C9H17NO8	[M+H]+	2-Amino-3,4-dihydroxybutanoic acid-3-O-arabinoside	Amino acids and derivatives	Amino acids and derivatives	-
89	168.06	94.06	167.058	C8H9NO3	[M+H]+	2-Amino-3-methoxybenzoic acid	Phenolic acids	Phenolic acids	3177-80-8
90	144.08	84.06	143.07	C5H9N3O2	[M+H]+	2-Amino-4,5-dihydro-1H-imidazole-4-acetic acid	Alkaloids	Alkaloids	69098-41-5
91	230.25	62.06	229.241	C14H31NO	[M+H]+	2-Amino-7-methyltridecan-1-ol*	Lipids	Sphingolipids	-
92	374.36	312.33	373.356	C22H47NO3	[M+H]+	2-AminodocoSane-1,5,21-triol	Lipids	Sphingolipids	-
93	234.21	88.08	233.199	C12H27NO3	[M+H]+	2-Aminododecane-1,3,4-triol	Lipids	Sphingolipids	-
94	274.27	88.08	273.267	C16H35NO2	[M+H]+	2-Aminohexadecane-1,15-diol	Lipids	Sphingolipids	-
95	290.27	242.25	289.262	C16H35NO3	[M+H]+	2-Aminohexadecane-1,16,16-triol	Lipids	Sphingolipids	-
96	274.27	88.08	273.267	C16H35NO2	[M+H]+	2-Aminohexadecane-1,4-diol	Lipids	Sphingolipids	-
97	290.27	228.23	289.262	C16H35NO3	[M+H]+	2-Aminohexadecane-1,5,15-triol	Lipids	Sphingolipids	-
98	290.27	88.08	289.262	C16H35NO3	[M+H]+	2-Aminohexadecane-1,5,6-triol	Lipids	Sphingolipids	-
99	346.33	88.08	345.324	C20H43NO3	[M+H]+	2-AminoicoSane-1,5,19-triol	Lipids	Sphingolipids	-
100	362.33	300.29	361.319	C20H43NO4	[M+H]+	2-AminoicoSane-1,5,7,19-tetraol	Lipids	Sphingolipids	-
101	378.32	286.28	377.314	C20H43NO5	[M+H]+	2-AminoicoSane-1,6,18,19,20-pentaol	Lipids	Sphingolipids	-
102	104.07	58.07	103.063	C4H9NO2	[M+H]+	2-Aminoisobutyric acid	Organic acids	Organic acids	62-57-7
103	334.3	242.25	333.288	C18H39NO4	[M+H]+	2-Aminooctadecane-1,16,18,18-tetraol	Lipids	Sphingolipids	-
104	302.31	88.08	301.298	C18H39NO2	[M+H]+	2-Aminooctadecane-1,4-diol	Lipids	Sphingolipids	-
105	334.3	88.08	333.288	C18H39NO4	[M+H]+	2-Aminooctadecane-1,5,7,17-tetraol	Lipids	Sphingolipids	-
106	230.25	62.06	229.241	C14H31NO	[M+H]+	2-Aminotetradecan-1-ol*	Lipids	Sphingolipids	-
107	262.24	88.08	261.23	C14H31NO3	[M+H]+	2-Aminotetradecane-1,11,13-triol	Lipids	Sphingolipids	-
108	246.24	88.08	245.236	C14H31NO2	[M+H]+	2-Aminotetradecane-1,4-diol	Lipids	Sphingolipids	-
109	262.24	88.08	261.23	C14H31NO3	[M+H]+	2-Aminotetradecane-1,5,11-triol	Lipids	Sphingolipids	-
110	262.24	200.2	261.23	C14H31NO3	[M+H]+	2-Aminotetradecane-1,5,13-triol	Lipids	Sphingolipids	-
111	278.23	88.08	277.225	C14H31NO4	[M+H]+	2-Aminotetradecane-1,5,7,11-tetraol	Lipids	Sphingolipids	-
112	136.04	80.06	135.032	C7H5NO2	[M+H]+	2-Benzoxazolinone	Alkaloids	Alkaloids	59-49-4
113	157.16	157.16	158.167	C10H22O	[M-H]-	2-Decanol*	Others	Alcohol compounds	1120-06-5
114	213.02	96.97	214.024	C5H11O7P	[M-H]-	2-Deoxyribose-1-phosphate*	Nucleotides and derivatives	Nucleotides and derivatives	17210-42-3
115	213.02	96.97	214.024	C5H11O7P	[M-H]-	2-Deoxyribose-5'-phosphate*	Nucleotides and derivatives	Nucleotides and derivatives	102916-66-5
116	302.12	140.07	301.116	C13H19NO7	[M+H]+	2-Ethyl-3-methylmaleimide-N-glucoside	Alkaloids	Alkaloids	-
117	269.1	177.05	268.095	C13H16O6	[M+H]+	2-Feruloyl-sn-glycerol	Phenolic acids	Phenolic acids	-
118	183.08	98.98	182.071	C6H15O4P	[M+H]+	2-Hexylphosphoric Acid	Others	Others	-
119	177.05	131.05	176.047	C10H8O3	[M+H]+	2-Hydroxy-2,3-dihydronaphthalene-1,4-dione	Quinones	Quinones	63534-43-0
120	131.03	87.04	132.042	C5H8O4	[M-H]-	2-Hydroxy-2-methyl-3-oxobutanoic acid*	Organic acids	Organic acids	71698-08-3
121	181.05	135.04	182.058	C9H10O4	[M-H]-	2-Hydroxy-3-(4-Hydroxyphenyl)Propanoic Acid*	Phenolic acids	Phenolic acids	23508-35-2
122	165.06	103.06	166.063	C9H10O3	[M-H]-	2-Hydroxy-3-phenylpropanoic acid	Phenolic acids	Phenolic acids	7326-19-4
123	329.23	171.1	330.241	C18H34O5	[M-H]-	2-Hydroxy-4-methyl-3-undecanoyloxypentanoic acid methyl ester*	Lipids	Free fatty acids	-
124	131.07	85.07	132.079	C6H12O3	[M-H]-	2-Hydroxy-4-methylpentanoic acid	Organic acids	Organic acids	498-36-2
125	163.04	119.05	164.047	C9H8O3	[M-H]-	2-Hydroxycinnamic acid*	Phenolic acids	Phenolic acids	583-17-5
126	271.23	225.22	272.235	C16H32O3	[M-H]-	2-Hydroxyhexadecanoic acid	Organic acids	Organic acids	764-67-0
127	131.07	85.07	132.079	C6H12O3	[M-H]-	2-Hydroxyisocaproic acid	Organic acids	Organic acids	20312-37-2
128	151.04	107.05	152.047	C8H8O3	[M-H]-	2-Hydroxyphenylacetic acid	Organic acids	Organic acids	614-75-5
129	175.06	115.04	176.069	C7H12O5	[M-H]-	2-Isopropylmalic Acid	Organic acids	Organic acids	49601-06-1
130	139.08	77.04	138.068	C8H10O2	[M+H]+	2-Methoxy-4-methylphenol	Phenolic acids	Phenolic acids	93-51-6
131	145.05	101.06	146.058	C6H10O4	[M-H]-	2-Methylglutaric acid*	Organic acids	Organic acids	617-62-9
132	131.03	87.05	132.042	C5H8O4	[M-H]-	2-Methylsuccinic acid*	Organic acids	Organic acids	498-21-5
133	531.09	189.01	532.106	C21H24O16	[M-H]-	2-O-(1'-O-glucosylCaffeoyl)hydroxycitric Acid	Phenolic acids	Phenolic acids	-
134	353.05	127	354.059	C15H14O10	[M-H]-	2-O-P-Coumaroylhydroxycitric Acid	Phenolic acids	Phenolic acids	-
135	331.28	313.27	330.277	C19H38O4	[M+H]+	2-Palmitoylglycerol*	Lipids	Glycerol ester	23470-00-0
136	105.07	77.04	122.073	C8H10O	[M-H2O+H]+	2-Phenylethanol	Phenolic acids	Phenolic acids	60-12-8
137	122.1	105.07	121.089	C8H11N	[M+H]+	2-Phenylethylamine	Alkaloids	Benzylphenylethylamine alkaloids	156-28-5
138	122.02	78.03	123.032	C6H5NO2	[M-H]-	2-Picolinic acid	Organic acids	Organic acids	98-98-6
139	100.08	56.05	99.0684	C5H9NO	[M+H]+	2-Piperidone	Alkaloids	Piperidine alkaloids	675-20-7
140	175.06	115.04	176.069	C7H12O5	[M-H]-	2-Propylmalic Acid*	Organic acids	Organic acids	-
141	159.07	97.07	160.074	C7H12O4	[M-H]-	2-Propylsuccinic acid	Organic acids	Organic acids	618-57-5
142	163.06	69.03	162.053	C6H10O5	[M+H]+	2-[(1R)-1-carboxyethoxy]propanoic acid	Organic acids	Organic acids	-
143	156.08	110.07	155.07	C6H9N3O2	[M+H]+	2-amino-3-(1H-pyrazol-1-yl)propanoic acid	Organic acids	Organic acids	2734-48-7
144	390.36	328.32	389.351	C22H47NO4	[M+H]+	2-aminodocoSane-1,5,7,21-tetraol	Lipids	Sphingolipids	-
145	406.35	300.29	405.345	C22H47NO5	[M+H]+	2-aminodocoSane-1,6,19,20,21-pentaol	Lipids	Sphingolipids	-
146	418.39	356.35	417.382	C24H51NO4	[M+H]+	2-aminotetracoSane-1,5,21,23-tetraol	Lipids	Sphingolipids	-
147	402.39	340.36	401.387	C24H51NO3	[M+H]+	2-aminotetracoSane-1,5,23-triol	Lipids	Sphingolipids	-
148	189.08	129.06	190.084	C8H14O5	[M-H]-	2-hydroxy-2-isobutylsuccinic acid	Others	Others	-
149	192.06	146.06	191.058	C10H9NO3	[M+H]+	2-oxindole-3-acetic acid	Alkaloids	Plumerane	2971-31-5
150	343.1	181.05	344.111	C15H20O9	[M-H]-	2-β-D-Glucopyranosyloxy-5-hydroxyphenylacetic acidmethylester*	Phenolic acids	Phenolic acids	-
151	373.13	343.08	372.121	C20H20O7	[M+H]+	3',4',5',5,7-Pentamethoxyflavone*	Flavonoids	Flavones	53350-26-8
152	291.09	139.04	290.079	C15H14O6	[M+H]+	3',4,4',5,7-Pentahydroxyflavan (Luteoforol)	Flavonoids	Flavanols	13392-26-2
153	481.13	319.05	480.127	C22H24O12	[M+H]+	3',5',5,7-Tetrahydroxy-4'-methoxyflavanone-3'-O-glucoside	Flavonoids	Flavones	-
154	385.11	179.07	386.121	C17H22O10	[M-H]-	3'-O-Beta-D-Glucopyranosyl plumbagic acid	Phenolic acids	Phenolic acids	-
155	536.2	195.06	518.164	C22H30O14	[M+NH4]+	3'-O-D-glucosylgentiopicroside	Terpenoids	Monoterpenoids	-
156	479.12	317.06	478.111	C22H22O12	[M+H]+	3'-O-Methyltricetin-5-O-glucoside*	Flavonoids	Flavones	-
157	479.12	317.07	478.111	C22H22O12	[M+H]+	3'-O-Methyltricetin-7-O-glucoside*	Flavonoids	Flavones	-
158	625.17	317.07	624.169	C28H32O16	[M+H]+	3'-methoxyquercetin-3-O-L-rhamnosyl(1→2)-glucopyranoside*	Flavonoids	Flavonols	-
159	487.15	145.03	488.153	C21H28O13	[M-H]-	3'-p-Coumaroyl-sucrose	Phenolic acids	Phenolic acids	-
160	671.18	347.07	670.174	C29H34O18	[M+H]+	3,3',5,7-Tetrahydroxy-4',6-Dimethoxyflavone-7-O-Gentiobioside; (Laciniatin-7-O-Gentiobioside)	Flavonoids	Flavonols	-
161	319.12	241.05	320.126	C17H20O6	[M-H]-	3,3-bis-(4-hydroxy-3-methoxyphenyl)-propane-1,2-diol	Others	Others	-
162	449.11	287.06	450.116	C21H22O11	[M-H]-	3,4,2',4',6'-Pentahydroxychalcone-4'-O-glucoside	Flavonoids	Chalcones	-
163	147.05	119.05	148.052	C9H8O2	[M-H]-	3,4-Dihydrocoumarin	Lignans and Coumarins	Coumarins	119-84-6
164	153.02	109.03	154.027	C7H6O4	[M-H]-	3,4-Dihydroxybenzoic acid (Protocatechuic acid)*	Phenolic acids	Phenolic acids	99-50-3
165	183.06	165.05	182.058	C9H10O4	[M+H]+	3,4-Dimethoxybenzoic acid; Veratric acid	Phenolic acids	Phenolic acids	93-07-2
166	209.08	191.07	208.074	C11H12O4	[M+H]+	3,4-Dimethoxycinnamic acid	Phenolic acids	Phenolic acids	2316-26-9
167	177.05	149.02	176.047	C10H8O3	[M+H]+	3,4-Methylenedioxycinnamaldehyde	Others	Aldehyde compounds	58095-77-5
168	471.35	407.33	470.34	C30H46O4	[M+H]+	3,4-Secodammara-4(28),20,24-trien-3,26-dioic acid	Terpenoids	Triterpene	-
169	177.06	117.04	178.063	C10H10O3	[M-H]-	3,4-methylenedioxy cinnamyl alcohol	Others	Alcohol compounds	58095-76-4
170	433.15	403.11	432.142	C22H24O9	[M+H]+	3,5,6,7,8,3',4'-Heptamethoxyflavone	Flavonoids	Flavonols	1178-24-1
171	403.14	373.09	402.132	C21H22O8	[M+H]+	3,5,6,7,8,4'-Hexamethoxyflavone	Flavonoids	Flavones	34170-18-8
172	188.07	118.07	187.063	C11H9NO2	[M+H]+	3,5-Dihydro-2H-Furo[3,2-C]Quinolin-4-One*	Alkaloids	Quinoline alkaloids	-
173	179.03	77.04	178.027	C9H6O4	[M+H]+	3,7-Dihydroxychromen-4-one	Others	Chromone	-
174	310.13	120.08	309.121	C15H19NO6	[M+H]+	3-(((S)-1-carboxy-2-phenylethyl)amino)-2,5-dihydroxycyclopentane-1-carboxylic acid	Others	Others	-
175	165.06	119.05	166.063	C9H10O3	[M-H]-	3-(4-Hydroxyphenyl)-propionic acid	Phenolic acids	Phenolic acids	501-97-3
176	337.09	163.04	338.1	C16H18O8	[M-H]-	3-(Hydroxycinnamoyl)-quinic acid*	Phenolic acids	Phenolic acids	-
177	203.15	116.07	202.143	C8H18N4O2	[M+H]+	3-(triazan-2-yl)propyl L-prolinate	Amino acids and derivatives	Amino acids and derivatives	-
178	277.074	137.027	278.079	C14H14O6	[M-H]-	3-Benzoyl-ShikimicAcid	Organic acids	Organic acids	-
179	138.08	94.07	137.071	C7H9N2O	[M+H]+	3-Carbamyl-1-methylpyridinium;(1-Methylnicotinamide)	Alkaloids	Pyridine alkaloids	1005-24-9
180	128.03	93.06	127.019	C6H6ClN	[M+H]+	3-Chloroaniline	Alkaloids	Alkaloids	108-42-9
181	133.01	71.01	134.022	C4H6O5	[M-H]-	3-Dehydro-L-Threonic Acid	Others	Saccharides	-
182	171.03	109.03	172.037	C7H8O5	[M-H]-	3-Dehydroshikimic acid	Organic acids	Organic acids	2922-42-1
183	227.09	181.09	226.084	C11H14O5	[M+H]+	3-Hydroxy-1-(4-hydroxy-3,5-dimethoxyphenyl)propan-1-one	Others	Ketone compounds	-
184	471.35	425.34	470.34	C30H46O4	[M+H]+	3-Hydroxy-23-oxoolean-12-en-28-oic acid (Gypsogenin)	Terpenoids	Triterpene	-
185	161.05	99.05	162.053	C6H10O5	[M-H]-	3-Hydroxy-3-methylpentane-1,5-dioic acid	Amino acids and derivatives	Amino acids and derivatives	503-49-1
186	327.14	165.09	328.152	C16H24O7	[M-H]-	3-Hydroxy-4-isopropylbenzylalcohol-3-O-glucoside	Phenolic acids	Phenolic acids	-
187	169.05	65.04	168.042	C8H8O4	[M+H]+	3-Hydroxy-4-methoxybenzoic acid; Isovanillic Acid	Phenolic acids	Phenolic acids	645-08-9
188	182.08	136.08	181.074	C9H11NO3	[M+H]+	3-Hydroxy-L-phenylalanine*	Amino acids and derivatives	Amino acids and derivatives	587-33-7
189	103.04	59.01	104.047	C4H8O3	[M-H]-	3-Hydroxybutyric acid	Organic acids	Organic acids	300-85-6
190	217.11	59.01	218.115	C10H18O5	[M-H]-	3-Hydroxydecanedioic acid	Organic acids	Organic acids	73141-46-5
191	239.07	165.05	238.063	C15H10O3	[M+H]+	3-Hydroxyflavone	Flavonoids	Flavonols	577-85-5
192	147.03	85.03	148.037	C5H8O5	[M-H]-	3-Hydroxyglutaric acid	Organic acids	Organic acids	638-18-6
193	487.34	451.32	486.334	C30H46O5	[M+H]+	3-Hydroxyolean-12-ene-28,29-dioic acid (Serratagenic Acid)	Terpenoids	Triterpene	-
194	157.08	130.07	156.069	C10H8N2	[M+H]+	3-Indoleacetonitrile	Alkaloids	Plumerane	771-51-7
195	175.06	115.04	176.069	C7H12O5	[M-H]-	3-Isopropylmalic Acid*	Organic acids	Organic acids	921-28-8
196	151.04	107.05	152.047	C8H8O3	[M-H]-	3-Methoxybenzoic acid	Phenolic acids	Phenolic acids	586-38-9
197	441.2	249.13	382.184	C16H30O10	[M+CH3COOH-H]-	3-Methylbutyl 6-O-(alpha-L-arabinopyranosyl)-beta-D-glucopyranoside	Others	Others	-
198	313.07	253.05	314.079	C17H14O6	[M-H]-	3-O-Acetylpinobanksin	Flavonoids	Flavanonols	52117-69-8
199	471.346	205.157	470.34	C30H46O4	[M+H]+	3-Oxo-19-hydroxyurs-12-en-28-oic acid (Pomonic acid)*	Terpenoids	Triterpene	13849-90-6
200	184.98	78.96	185.993	C3H7O7P	[M-H]-	3-Phospho-D-glyceric acid	Others	Saccharides	820-11-1
201	131.05	70.03	132.054	C4H8N2O3	[M-H]-	3-Ureidopropionic Acid	Organic acids	Organic acids	462-88-4
202	339.12	309.08	340.131	C20H20O5	[M-H]-	3-[(2S,3S)-2-(4-hydroxy-3-methoxyphenyl)-7-methoxy-3-methyl-2,3-dihydro-1-benzofuran-5-yl]prop-2-enal	Phenolic acids	Phenolic acids	-
203	188.07	118.06	187.063	C11H9NO2	[M+H]+	3-amino-2-naphthoic acid*	Alkaloids	Alkaloids	-
204	209.08	121.06	208.074	C11H12O4	[M+H]+	3-ethyl-7-hydroxy-6-methoxyphthalide	Others	Others	-
205	116.07	70.06	115.063	C5H9NO2	[M+H]+	3-hydroxy-1-methylpyrrolidin-2-one*	Alkaloids	Pyrrole alkaloids	132996-63-5
206	203.11	185.1	202.099	C13H14O2	[M+H]+	3-hydroxy-2-methyl-2-prop-2-enyl-3H-inden-1-one	Others	Others	-
207	272.11	110.06	271.106	C12H17NO6	[M+H]+	3-pyridine-methanol-O-β-D-glucopyranosyl*	Alkaloids	Pyridine alkaloids	-
208	190.05	144.04	189.043	C10H7NO3	[M+H]+	3-quinolinecarboxylic acid	Alkaloids	Quinoline alkaloids	-
209	209.15	137.1	208.146	C13H20O2	[M+H]+	3S-3-hydroxy-β-damascon	Terpenoids	Monoterpenoids	-
210	547.23	367.17	546.221	C27H34N2O10	[M+H]+	3α-Dihydrocadambine	Alkaloids	Plumerane	54483-84-0
211	333.24	279.23	332.235	C21H32O3	[M+H]+	3β,14β-dihydroxy-pregn-5-en-20-one	Steroids	Steroid	-
212	547.23	385.17	546.221	C27H34N2O10	[M+H]+	3β-Isodihydrocadambine	Alkaloids	Plumerane	62014-69-1
213	168.07	105.03	167.058	C8H9NO3	[M+H]+	4,5,6-Trihydroxy-2-cyclohexen-1-ylideneacetonitrile	Alkaloids	Alkaloids	-
214	193.05	133.03	194.058	C10H10O4	[M-H]-	4,5,8-Trihydroxy-α-tetralone	Quinones	Naphthol	-
215	110.06	65.04	109.053	C6H7NO	[M+H]+	4-Aminophenol	Alkaloids	Phenolamine	123-30-8
216	146.09	87.04	145.085	C5H11N3O2	[M+H]+	4-Guanidinobutyric acid	Organic acids	Organic acids	463-00-3
217	131.03	87.05	132.042	C5H8O4	[M-H]-	4-Hydroxy-2-Oxopentanoic Acid*	Organic acids	Organic acids	3318-73-8
218	148.09	74.02	147.089	C6H13NO3	[M+H]+	4-Hydroxy-L-Isoleucine	Amino acids and derivatives	Amino acids and derivatives	781658-23-9
219	135.05	92.03	136.052	C8H8O2	[M-H]-	4-Hydroxyacetophenone	Others	Ketone compounds	99-93-4
220	121.03	92.03	122.037	C7H6O2	[M-H]-	4-Hydroxybenzaldehyde	Others	Aldehyde compounds	123-08-0
221	137.02	93.03	138.032	C7H6O3	[M-H]-	4-Hydroxybenzoic acid	Phenolic acids	Phenolic acids	99-96-7
222	485.13	323.2	486.137	C21H26O13	[M-H]-	4-Hydroxycoumarin di-glucoside	Lignans and Coumarins	Coumarins	-
223	181.05	135.04	182.058	C9H10O4	[M-H]-	4-Hydroxyphenyllactic Acid*	Phenolic acids	Phenolic acids	306-23-0
224	137.06	94.04	136.052	C8H8O2	[M+H]+	4-Methoxybenzaldehyde	Others	Aldehyde compounds	123-11-5
225	163.08	91.05	162.068	C10H10O2	[M+H]+	4-MethoxycinnaMaldehyde	Others	Aldehyde compounds	1963-36-6
226	177.06	133.07	178.063	C10H10O3	[M-H]-	4-Methoxycinnamic acid	Phenolic acids	Phenolic acids	830-09-1
227	116.07	70.06	115.063	C5H9NO2	[M+H]+	4-Methylazetidine-2-Carboxylic acid*	Alkaloids	Alkaloids	1779725-63-1
228	137.06	77.04	136.052	C8H8O2	[M+H]+	4-Methylbenzoic acid	Phenolic acids	Phenolic acids	99-94-5
229	192.07	148.08	193.074	C10H11NO3	[M-H]-	4-Methylhippuric Acid	Amino acids and derivatives	Amino acids and derivatives	27115-50-0
230	140.03	98.96	139.027	C6H5NO3	[M+H]+	4-Nitrophenol	Phenolic acids	Phenolic acids	100-02-7
231	515.14	191.06	516.148	C22H28O14	[M-H]-	4-O-(3'-O-alpha-D-Glucopyranosyl)caffeoylquinic acid	Phenolic acids	Phenolic acids	1401352-63-3
232	515.14	323.08	516.148	C22H28O14	[M-H]-	4-O-(4'-O-alpha-D-Glucopyranosyl)caffeoylquinic acid	Phenolic acids	Phenolic acids	1401352-62-2
233	299.08	137.02	300.084	C13H16O8	[M-H]-	4-O-Glucosyl-4-hydroxybenzoic acid	Phenolic acids	Phenolic acids	-
234	385.11	223.06	386.121	C17H22O10	[M-H]-	4-O-Glucosyl-sinapate	Phenolic acids	Phenolic acids	-
235	277.22	277.22	278.225	C18H30O2	[M-H]-	4-[3-(4,8-dimethylnona-3,7-dienyl)-3-methyloxiran-2-yl]butan-2-one	Others	Others	-
236	335.08	179.03	336.084	C16H16O8	[M-H]-	4-caffeoylshikimic acid	Phenolic acids	Phenolic acids	-
237	165.05	119.05	164.047	C9H8O3	[M+H]+	4-hydroxyphenyl acrylaldehyde	Others	Aldehyde compounds	-
238	120.08	77.04	119.07	C3H9N3O2	[M+H]+	4-methyl-1,5,2,3-dioxadiazinan-2-amine	Nucleotides and derivatives	Nucleotides and derivatives	-
239	298.1	136.06	297.09	C11H15N5O3S	[M+H]+	5'-Deoxy-5'-(methylthio)adenosine	Nucleotides and derivatives	Nucleotides and derivatives	2457-80-9
240	387.17	207.1	388.173	C18H28O9	[M-H]-	5'-Glucosyloxyjasmanic acid	Phenolic acids	Phenolic acids	-
241	347.07	315.06	346.069	C17H14O8	[M+H]+	5,6,3',4'-Tetrahydroxy-3,7-dimethoxyflavone	Flavonoids	Flavones	-
242	509.13	347.08	508.122	C23H24O13	[M+H]+	5,6,3',4'-Tetrahydroxy-3,7-dimethoxyflavone-6-O-glucoside*	Flavonoids	Flavones	-
243	303.05	151.03	304.058	C15H12O7	[M-H]-	5,7,3',4',5'-Pentahydroxydihydroflavone	Flavonoids	Flavanones	-
244	291.09	139.04	290.079	C15H14O6	[M+H]+	5,7,3',4',5'-Pentahydroxyflavan (Tricetiflavan)	Flavonoids	Flavanols	-
245	641.17	479.11	640.164	C28H32O17	[M+H]+	5,7,3',4'-Tetrahydroxy-6-methoxyflavone-8-C-[glucosyl-(1-2)]-glucoside	Flavonoids	Flavones	-
246	193.05	91.05	192.042	C10H8O4	[M+H]+	5,7-Dihydroxy-4-methylcoumarin	Lignans and Coumarins	Coumarins	2107-76-8
247	359.22	277.22	300.209	C20H28O2	[M+CH3COO]-	5,8,11-Eicosatriynoic Acid	Lipids	Free fatty acids	13488-22-7
248	315.11	153.06	316.116	C14H20O8	[M-H]-	5-(2-Hydroxyethyl)-2-O-glucosylphenol*	Phenolic acids	Phenolic acids	-
249	181.05	107.05	180.042	C9H8O4	[M+H]+	5-Acetylsalicylic acid	Phenolic acids	Phenolic acids	13110-96-8
250	296.07	104.11	295.057	C8H14N3O7P	[M+H]+	5-Aminoimidazole ribonucleotide	Nucleotides and derivatives	Nucleotides and derivatives	25635-88-5
251	132.07	86.06	131.058	C5H9NO3	[M+H]+	5-Aminolevulinic Acid	Alkaloids	Alkaloids	106-60-5
252	118.09	101.06	117.079	C5H11NO2	[M+H]+	5-Aminovaleric acid	Organic acids	Organic acids	660-88-8
253	329.09	167.04	330.095	C14H18O9	[M-H]-	5-Glucosyloxy-2-Hydroxybenzoic acid methyl ester	Phenolic acids	Phenolic acids	-
254	221.09	130.06	220.085	C11H12N2O3	[M+H]+	5-Hydroxy-DL-tryptophan(5-HTP)	Amino acids and derivatives	Amino acids and derivatives	56-69-9
255	335.08	135.05	336.084	C16H16O8	[M-H]-	5-O-Caffeoylshikimic acid	Phenolic acids	Phenolic acids	73263-62-4
256	337.09	191.06	338.1	C16H18O8	[M-H]-	5-O-p-Coumaroylquinic acid	Phenolic acids	Phenolic acids	1899-30-5
257	343.15	163.07	342.147	C20H22O5	[M+H]+	5-[(2r,3s,4s,5s)-5-(2h-1,3-benzodioxol-5-yl)-3,4-dimethyloxolan-2-yl]-2-methoxyphenol*	Lignans and Coumarins	Lignans	-
258	163.04	133.03	162.032	C9H6O3	[M+H]+	5-hydroxyindene-1,3-dione	Terpenoids	Sesquiterpenoids	131977-61-2
259	111.04	55.05	110.037	C6H6O2	[M+H]+	5-methylfurfural	Others	Others	620-02-0
260	525.16	161.02	526.169	C24H30O13	[M-H]-	6''-O-Caffeoylharpagide	Terpenoids	Terpene	1147125-45-8
261	517.16	175.04	518.164	C22H30O14	[M-H]-	6'-O-Feruloyl-D-sucrose*	Phenolic acids	Phenolic acids	118230-77-6
262	507.17	179.05	508.179	C21H32O14	[M-H]-	6'-O-Glucosylaucubin	Terpenoids	Sesquiterpenoids	-
263	523.15	161.03	524.153	C24H28O13	[M-H]-	6'-O-caffeoylcatalpol	Others	Others	-
264	193.05	147.04	192.042	C10H8O4	[M+H]+	6,7-Dihydroxy-4-methylcoumarin	Lignans and Coumarins	Coumarins	529-84-0
265	329.23	171.101	330.241	C18H34O5	[M-H]-	6,9,10-Trihydroxyoctadec-7-enoic acid; Sanleng acid*	Lipids	Free fatty acids	-
266	132.1	69.07	131.095	C6H13NO2	[M+H]+	6-Aminocaproic acid	Organic acids	Organic acids	60-32-2
267	479.12	317.07	478.111	C22H22O12	[M+H]+	6-C-Methylquercetin-3-O-glucoside*	Flavonoids	Flavonols	-
268	625.18	317.06	624.169	C28H32O16	[M+H]+	6-C-Methylquercetin-3-O-rutinoside*	Flavonoids	Flavonols	-
269	155.01	119.04	154.005	C5H3ClN4	[M+H]+	6-Chloropurine	Nucleotides and derivatives	Nucleotides and derivatives	87-42-3
270	132.1	57.03	131.095	C6H13NO2	[M+H]+	6-Deoxyfagomine	Alkaloids	Piperidine alkaloids	197449-09-5
271	365.06	167.03	366.074	C20H14O7	[M-H]-	6-Hydroxy-4-(4-hydroxy-3-methoxyphenyl)-7-methoxy-naphtho[2,3-c]furan-1,3-dione-1	Lignans and Coumarins	Lignans	-
272	131.07	85.07	132.079	C6H12O3	[M-H]-	6-Hydroxyhexanoic acid	Organic acids	Organic acids	1191-25-9
273	627.16	303.1	626.148	C27H30O17	[M+H]+	6-Hydroxykaempferol-3,6-O-Diglucoside	Flavonoids	Flavonols	-
274	465.1	303.1	464.096	C21H20O12	[M+H]+	6-Hydroxykaempferol-7-O-glucoside	Flavonoids	Flavonols	-
275	463.09	301.03	464.096	C21H20O12	[M-H]-	6-Hydroxyluteolin 5-glucoside*	Flavonoids	Flavones	-
276	195.06	117.03	194.057	C10H10O4	[M+H]+	6-Hydroxymellein	Others	Chromone	70901-60-9
277	479.12	317.07	478.111	C22H22O12	[M+H]+	6-Methoxykaempferol-3-O-glucoside*	Flavonoids	Flavonols	63422-27-5
278	311.1	89.02	312.106	C11H20O10	[M-H]-	6-O-alpha-L-arabinopyranosyl-D-glucopyranose	Others	Saccharides	14116-69-9
279	166.07	124.05	165.065	C6H7N5O	[M+H]+	6-O-methylguanine	Nucleotides and derivatives	Nucleotides and derivatives	20535-83-5
280	325.09	145.03	326.1	C15H18O8	[M-H]-	6-O-p-Coumaroyl-β-D-glucose	Phenolic acids	Phenolic acids	114297-65-3
281	507.15	345.1	506.142	C24H26O12	[M+H]+	7,3',4'-Trihydroxyquercetin glucoside	Flavonoids	Flavones	-
282	166.07	149.05	165.065	C6H7N5O	[M+H]+	7-Methylguanine	Nucleotides and derivatives	Nucleotides and derivatives	578-76-7
283	441.08	289.07	442.09	C22H18O10	[M-H]-	7-O-Galloyltricetiflavan	Flavonoids	Flavanols	-
284	409.15	247.09	408.142	C20H24O9	[M+H]+	7-O-Methylaloesin	Flavonoids	Other Flavonoids	-
285	163.04	89.04	162.032	C9H6O3	[M+H]+	7-hydroxy-2H-1-benzopyran-2-one	Lignans and Coumarins	Coumarins	-
286	211.13	167.15	212.141	C12H20O3	[M-H]-	7-oxo-11-Dodecenoic acid	Lipids	Free fatty acids	54921-60-7
287	525.2	179.07	526.205	C25H34O12	[M-H]-	7R,8S-erythro-3',4,9,9'-tetrahydroxy-3-methoxy-8-O-4'-neolignan-7-O-glucopyr-anoside,	Lignans and Coumarins	Lignans	-
288	337.23	157.12	338.246	C20H34O4	[M-H]-	7β-Hydroxydarutigenol	Terpenoids	Ditepenoids	1188281-99-3
289	153.05	136.03	152.045	C4H4N6O	[M+H]+	8-Azaguanine	Nucleotides and derivatives	Nucleotides and derivatives	134-58-7
290	449.14	287.09	448.137	C22H24O10	[M+H]+	8-O-methyl-7-hydroxyaloin	Quinones	Anthraquinone	-
291	146.06	91.05	145.053	C9H7NO	[M+H]+	8-hydroxyquinoline	Alkaloids	Quinoline alkaloids	148-24-3
292	329.23	229.15	330.241	C18H34O5	[M-H]-	9,10,13-Trihydroxy-11-Octadecenoic Acid	Lipids	Free fatty acids	29907-57-1
293	331.25	157.12	332.256	C18H36O5	[M-H]-	9,10,18-Trihydroxystearic acid	Lipids	Free fatty acids	496-86-6
294	287.22	287.22	288.23	C16H32O4	[M-H]-	9,16-Dihydroxypalmitic acid	Lipids	Free fatty acids	38076-49-2
295	427.39	345.32	426.386	C30H50O	[M+H]+	9,19-Cyclolanost-24-en-3-ol (Cycloartenol)	Terpenoids	Triterpene	469-38-5
296	267.07	135.03	268.081	C10H12N4O5	[M-H]-	9-(Arabinosyl)hypoxanthine	Nucleotides and derivatives	Nucleotides and derivatives	7013-16-3
297	268.1	136.06	267.097	C10H13N5O4	[M+H]+	9-Alpha-Ribofuranosyladenine*	Nucleotides and derivatives	Nucleotides and derivatives	-
298	268.11	136.07	267.097	C10H13N5O4	[M+H]+	9-Arabinosyladenine*	Nucleotides and derivatives	Nucleotides and derivatives	-
299	311.22	223.17	312.23	C18H32O4	[M-H]-	9-Hydroxy-12-oxo-15(Z)-octadecenoic acid*	Lipids	Free fatty acids	-
300	269.09	137.05	268.081	C10H12N4O5	[M+H]+	9-[(2S,3S,4S,5R)-3,4-dihydroxy-5-(hydroxymethyl)oxolan-2-yl]-1H-purin-6-one	Alkaloids	Alkaloids	-
301	291.2	73.03	292.204	C18H28O3	[M-H]-	9s,13r-12-Oxophytodienoic Acid	Lipids	Free fatty acids	71606-07-0
302	263.13	204.12	264.136	C15H20O4	[M-H]-	Abscisic acid	Organic acids	Organic acids	21293-29-8
303	325.07	151.04	326.075	C13H14N2O8	[M-H]-	Abu-Asp-OH	Amino acids and derivatives	Amino acids and derivatives	-
304	347.1	167.03	348.107	C15H16N4O6	[M-H]-	Abu-His-OH	Amino acids and derivatives	Amino acids and derivatives	-
305	136.06	119.04	135.054	C5H5N5	[M+H]+	Adenine	Nucleotides and derivatives	Nucleotides and derivatives	73-24-5
306	348.07	136.06	347.063	C10H14N5O7P	[M+H]+	Adenosine 5'-monophosphate	Nucleotides and derivatives	Nucleotides and derivatives	61-19-8
307	268.1	136.06	267.097	C10H13N5O4	[M+H]+	Adenosine*	Nucleotides and derivatives	Nucleotides and derivatives	58-61-7
308	145.05	101.06	146.058	C6H10O4	[M-H]-	Adipic Acid*	Organic acids	Organic acids	124-04-9
309	131.13	114.1	130.122	C5H14N4	[M+H]+	Agmatine	Alkaloids	Alkaloids	306-60-5
310	315.123	121.064	314.115	C18H18O5	[M+H]+	Agrimonolide	Lignans and Coumarins	Coumarins	21499-24-1
311	181.07	59.01	182.079	C6H14O6	[M-H]-	Allitol	Others	Saccharides	488-44-8
312	137.05	110.03	136.038	C5H4N4O	[M+H]+	Allopurinol	Nucleotides and derivatives	Nucleotides and derivatives	315-30-0
313	313.14	151.08	312.136	C19H20O4	[M+H]+	Alnusonol	Phenolic acids	Phenolic acids	52330-12-8
314	255.07	213.06	256.074	C15H12O4	[M-H]-	Aloe-Emodin-9-Anthrone	Quinones	Anthraquinone	6247-99-0
315	118.01	74.02	119.022	C3H5NO4	[M-H]-	Aminomalonic acid	Organic acids	Organic acids	1068-84-4
316	530.3	315.16	512.262	C26H40O10	[M+NH4]+	Andrographiside	Terpenoids	Ditepenoids	82209-76-5
317	327.11	165.05	328.116	C15H20O8	[M-H]-	Androsin	Phenolic acids	Phenolic acids	531-28-2
318	153.05	109.06	152.047	C8H8O3	[M+H]+	Anisic acid; 4-Methoxybenzoic acid	Phenolic acids	Phenolic acids	100-09-4
319	460.15	117.9	461.153	C19H27NO12	[M-H]-	Anthranilate-1-O-Sophoroside	Phenolic acids	Phenolic acids	-
320	189.14	70.07	188.127	C7H16N4O2	[M+H]+	Arginine methyl ester*	Amino acids and derivatives	Amino acids and derivatives	-
321	289.12	131.08	290.123	C10H18N4O6	[M-H]-	Argininosuccinic acid	Organic acids	Organic acids	2387-71-5
322	449.11	287.06	450.116	C21H22O11	[M-H]-	Aromadendrin-7-O-glucoside	Flavonoids	Flavanonols	28189-90-4
323	284.1	152.06	283.084	C16H13NO4	[M+H]+	Asiaticumine A	Alkaloids	Alkaloids	-
324	246.15	166.09	245.138	C10H19N3O4	[M+H]+	Asn-Ile	Amino acids and derivatives	Amino acids and derivatives	438533-59-6
325	246.14	141.1	245.138	C10H19N3O4	[M+H]+	Asn-Leu	Amino acids and derivatives	Amino acids and derivatives	22601-71-4
326	449.11	287.06	448.101	C21H20O11	[M+H]+	Aureusidin-4-O-glucoside*	Flavonoids	Aurones	-
327	343.15	163.07	342.147	C20H22O5	[M+H]+	Avicennol*	Lignans and Coumarins	Coumarins	56110-68-0
328	317.07	302.04	316.058	C16H12O7	[M+H]+	Azaleatin (5-O-Methylquercetin)	Flavonoids	Flavonols	529-51-1
329	187.1	125.1	188.105	C9H16O4	[M-H]-	Azelaic acid	Organic acids	Organic acids	123-99-9
330	390.11	328.07	389.101	C21H15N3O5	[M+H]+	Azoxystrobin acid	Alkaloids	Alkaloids	1185255-09-7
331	129.03	69	128.022	C4H4N2O3	[M+H]+	Barbituric acid;Malonylurea;2,4,6-Pyrimidinetrione	Nucleotides and derivatives	Nucleotides and derivatives	67-52-7
332	327.07	207.03	328.079	C14H16O9	[M-H]-	Bengenin	Phenolic acids	Phenolic acids	477-90-7
333	122.06	105.03	121.053	C7H7NO	[M+H]+	Benzamide	Alkaloids	Alkaloids	55-21-0
334	123.04	79.05	122.037	C7H6O2	[M+H]+	Benzoic acid	Phenolic acids	Phenolic acids	65-85-0
335	401.14	269.1	402.153	C18H26O10	[M-H]-	Benzyl β-primeveroside*	Phenolic acids	Phenolic acids	-
336	401.14	269.1	402.153	C18H26O10	[M-H]-	Benzyl-(2''-O-xylosyl)glucoside*	Phenolic acids	Phenolic acids	-
337	118.09	58.07	117.079	C5H11NO2	[M+H]+	Betaine	Alkaloids	Alkaloids	107-43-7
338	391.28	149.02	390.277	C24H38O4	[M+H]+	Bis(2-ethyl-hexyl)-phthalate	Phenolic acids	Phenolic acids	-
339	391.28	149.02	390.277	C24H38O4	[M+H]+	Bis(2-ethylhexyl)phthalate	Phenolic acids	Phenolic acids	117-81-7
340	433.11	271.06	434.121	C21H22O10	[M-H]-	Butin-7-O-glucoside	Flavonoids	Flavanones	-
341	279.16	149.03	278.152	C16H22O4	[M+H]+	Butyl isobutyl phthalate*	Phenolic acids	Phenolic acids	17851-53-5
342	191.1	145.1	190.099	C12H14O2	[M+H]+	Butylphthalide	Others	Lactones	6066-49-5
343	179.03	135.05	180.042	C9H8O4	[M-H]-	Caffeic acid	Phenolic acids	Phenolic acids	331-39-5
344	195.09	83.06	194.08	C8H10N4O2	[M+H]+	Caffeine	Alkaloids	Alkaloids	58-08-2
345	327.11	147.05	328.116	C15H20O8	[M-H]-	Caffeyl alcohol 4-O-β-D-glucopyranoside	Phenolic acids	Phenolic acids	-
346	289.07	245.08	290.079	C15H14O6	[M-H]-	Catechin	Flavonoids	Flavanols	154-23-4
347	441.08	169.01	442.09	C22H18O10	[M-H]-	Catechin gallate	Flavonoids	Flavanols	130405-40-2
348	353.09	191.06	354.095	C16H18O9	[M-H]-	Chlorogenic acid (3-O-Caffeoylquinic acid)*	Phenolic acids	Phenolic acids	327-97-9
349	367.1	190.9	368.111	C17H20O9	[M-H]-	Chlorogenic acid methyl ester	Phenolic acids	Phenolic acids	29708-87-0
350	104.11	60.08	104.107	C5H14NO+	[M]+	Choline	Alkaloids	Alkaloids	62-49-7
351	258.11	104.11	257.103	C8H20NO6P	[M+H]+	Choline Alfoscerate	Lipids	PC	28319-77-9
352	315.11	153.06	316.116	C14H20O8	[M-H]-	Cimidahurinine*	Phenolic acids	Phenolic acids	142542-89-0
353	469.17	307.12	468.163	C22H28O11	[M+H]+	Cimifugin-7-O-glucoside	Others	Chromone	80681-45-4
354	453.11	343.08	452.111	C24H20O9	[M+H]+	Cinchonain Ia*	Flavonoids	Flavanols	85022-69-1
355	453.11	343.08	452.111	C24H20O9	[M+H]+	Cinchonain Ib*	Flavonoids	Flavanols	85081-24-9
356	147.05	103.06	148.052	C9H8O2	[M-H]-	Cinnamic acid	Phenolic acids	Phenolic acids	140-10-3
357	477.14	357.09	476.132	C23H24O11	[M+H]+	Cirsimaritin-8-C-glucoside	Flavonoids	Flavones	-
358	129.02	85.03	130.027	C5H6O4	[M-H]-	Citraconic acid	Organic acids	Organic acids	498-23-7
359	191.02	111.01	192.027	C6H8O7	[M-H]-	Citric Acid	Organic acids	Organic acids	77-92-9
360	515.12	341.11	516.133	C18H28O17	[M-H]-	Citric Acid diglucoside	Organic acids	Organic acids	-
361	353.07	111	354.08	C12H18O12	[M-H]-	Citric acid glucoside	Organic acids	Organic acids	-
362	515.12	111.01	516.133	C18H28O17	[M-H]-	Citric acid-1-O-diglucoside	Organic acids	Organic acids	-
363	233.16	233.16	234.162	C15H22O2	[M-H]-	Confertifoline	Terpenoids	Sesquiterpenoids	1811-23-0
364	315.11	135.05	316.116	C14H20O8	[M-H]-	Cornoside	Phenolic acids	Phenolic acids	40661-45-8
365	375.13	153.06	376.137	C16H24O10	[M-H]-	Cornusoside A	Others	Others	-
366	147.04	103.05	146.037	C9H6O2	[M+H]+	Coumarin	Lignans and Coumarins	Coumarins	91-64-5
367	337.09	191.06	338.1	C16H18O8	[M-H]-	Coumaroyl Quinic Acid	Others	Others	-
368	284.1	152.06	283.092	C10H13N5O5	[M+H]+	Crotonoside; 2-Hydroxyadenosine	Nucleotides and derivatives	Nucleotides and derivatives	1818-71-9
369	353.09	191.06	354.095	C16H18O9	[M-H]-	Cryptochlorogenic acid (4-O-Caffeoylquinic acid)*	Phenolic acids	Phenolic acids	905-99-7
370	239.2	223.02	240.209	C15H28O2	[M-H]-	Cryptomeridiol	Terpenoids	Sesquiterpenoids	4666-84-6
371	225.2	100.11	224.189	C13H24N2O	[M+H]+	Cuscohygrine	Alkaloids	Pyrrole alkaloids	454-14-8
372	611.14	287.06	611.139	C30H27O14+	[M]+	Cyanidin-3-O-(6''-O-caffeoyl)glucoside	Flavonoids	Anthocyanidins	-
373	595.14	287.06	595.145	C30H27O13+	[M]+	Cyanidin-3-O-(6''-O-p-Coumaroyl)glucoside	Flavonoids	Anthocyanidins	-
374	449.109	287.055	449.108	C21H21O11+	[M]+	Cyanidin-3-O-galactoside*	Flavonoids	Anthocyanidins	142506-26-1
375	449.108	287.055	449.108	C21H21O11+	[M]+	Cyanidin-3-O-glucoside*	Flavonoids	Anthocyanidins	47705-70-4
376	227.1	116.07	226.095	C10H14N2O4	[M+H]+	Cyclo(Pro-Glu)	Amino acids and derivatives	Amino acids and derivatives	-
377	100.11	55.05	99.1048	C6H13N	[M+H]+	Cyclohexylamine	Alkaloids	Alkaloids	108-91-8
378	130.09	84.08	129.079	C6H11NO2	[M+H]+	Cycloleucine	Amino acids and derivatives	Amino acids and derivatives	52-52-8
379	244.09	112.05	243.085	C9H13N3O5	[M+H]+	Cytarabine	Nucleotides and derivatives	Nucleotides and derivatives	147-94-4
380	244.09	112.05	243.085	C9H13N3O5	[M+H]+	Cytidine	Nucleotides and derivatives	Nucleotides and derivatives	65-46-3
381	112.05	95.02	111.043	C4H5N3O	[M+H]+	Cytosine	Nucleotides and derivatives	Nucleotides and derivatives	71-30-7
382	132.1	86.1	131.095	C6H13NO2	[M+H]+	D-Allo-Isoleucine*	Amino acids and derivatives	Amino acids and derivatives	1509-35-9
383	147.03	85.03	148.037	C5H8O5	[M-H]-	D-Arabinono-1,4-lactone	Others	Saccharides	2782-09-4
384	149.05	59.01	150.053	C5H10O5	[M-H]-	D-Arabinose*	Others	Saccharides	10323-20-3
385	179.056	59.0139	180.063	C6H12O6	[M-H]-	D-Fructose*	Others	Saccharides	57-48-7
386	338.99	96.97	339.996	C6H14O12P2	[M-H]-	D-Fructose-1,6-biphosphate	Others	Saccharides	488-69-7
387	209.03	85.03	210.038	C6H10O8	[M-H]-	D-Galactaric acid	Others	Saccharides	526-99-8
388	179.06	59.01	180.063	C6H12O6	[M-H]-	D-Galactose*	Others	Saccharides	59-23-4
389	193.04	72.99	194.043	C6H10O7	[M-H]-	D-Galacturonic acid*	Others	Saccharides	685-73-4
390	193.04	72.99	194.043	C6H10O7	[M-H]-	D-Glucoronic acid*	Others	Saccharides	6556-12-3
391	179.06	59.01	180.063	C6H12O6	[M-H]-	D-Glucose*	Others	Saccharides	50-99-7
392	341.11	89.02	342.116	C12H22O11	[M-H]-	D-Lactose*	Others	Saccharides	63-42-3
393	133.01	71.01	134.022	C4H6O5	[M-H]-	D-Malic acid*	Organic acids	Organic acids	636-61-3
394	341.109	89.0244	342.116	C12H22O11	[M-H]-	D-Maltose*	Others	Saccharides	69-79-4
395	181.072	101.024	182.079	C6H14O6	[M-H]-	D-Mannitol*	Others	Saccharides	69-65-8
396	179.06	59.01	180.063	C6H12O6	[M-H]-	D-Mannose*	Others	Saccharides	3458-28-4
397	133.1	70.07	132.09	C5H12N2O2	[M+H]+	D-Ornithine	Amino acids and derivatives	Amino acids and derivatives	348-66-3
398	503.16	179.06	504.169	C18H32O16	[M-H]-	D-Panose*	Others	Saccharides	33401-87-5
399	206.14	76.08	205.131	C9H19NO4	[M+H]+	D-Panthenol	Others	Alcohol compounds	81-13-0
400	220.12	90.05	219.111	C9H17NO5	[M+H]+	D-Pantothenic Acid	Others	Vitamin	79-83-4
401	193.07	59.01	194.079	C7H14O6	[M-H]-	D-Pinitol*	Others	Saccharides	10284-63-6
402	144.1	84.08	144.102	C7H14NO2+	[M]+	D-Proline betaine	Amino acids and derivatives	Amino acids and derivatives	1195-94-4
403	149.05	75.01	150.053	C5H10O5	[M-H]-	D-Ribose	Others	Saccharides	50-69-1
404	181.07	71.01	182.079	C6H14O6	[M-H]-	D-Sorbitol	Others	Saccharides	50-70-4
405	121.05	59.01	122.058	C4H10O4	[M-H]-	D-Threitol	Others	Saccharides	2418-52-2
406	375.13	135.05	376.137	C16H24O10	[M-H]-	D-Threo-guaiacylglycerol-7-O-β-D-glucoside	Phenolic acids	Phenolic acids	-
407	135.03	75.01	136.037	C4H8O5	[M-H]-	D-Threonic Acid	Others	Saccharides	3909-12-4
408	165.04	75.01	166.048	C5H10O6	[M-H]-	D-Xylonic acid	Others	Saccharides	526-91-0
409	162.08	98.06	161.069	C6H11NO4	[M+H]+	DL-2-Aminoadipic acid	Alkaloids	Alkaloids	542-32-5
410	165.06	119.05	166.063	C9H10O3	[M-H]-	DL-3-Phenyllactic acid	Organic acids	Organic acids	828-01-3
411	132.1	86.1	131.095	C6H13NO2	[M+H]+	DL-Leucine*	Amino acids and derivatives	Amino acids and derivatives	328-39-2
412	150.06	61.01	149.051	C5H11NO2S	[M+H]+	DL-Methionine	Amino acids and derivatives	Amino acids and derivatives	59-51-8
413	205.09	146.06	204.09	C11H12N2O2	[M+H]+	DL-Tryptophan	Amino acids and derivatives	Amino acids and derivatives	54-12-6
414	207.09	59.01	208.095	C8H16O6	[M-H]-	Dambonitol	Others	Saccharides	523-94-4
415	247.09	229.09	246.089	C14H14O4	[M+H]+	Decursinol	Lignans and Coumarins	Coumarins	23458-02-8
416	359.15	131.05	358.142	C20H22O6	[M+H]+	Dehydrodiconiferyl alcohol	Lignans and Coumarins	Lignans	4263-87-0
417	221.12	177.13	222.126	C13H18O3	[M-H]-	Dehydrovomifoliol	Terpenoids	Monoterpenoids	15764-81-5
418	611.14	303.05	611.139	C30H27O14+	[M]+	Delphinidin-3-O-(6''-O-p-coumaroyl)glucoside	Flavonoids	Anthocyanidins	-
419	327.11	165.05	328.116	C15H20O8	[M-H]-	Demethyl coniferin	Phenolic acids	Phenolic acids	-
420	347.15	165.05	348.157	C19H24O6	[M-H]-	Demethyl-Secoisolariciresinol	Lignans and Coumarins	Lignans	-
421	283.16	59	284.162	C15H24O5	[M-H]-	Dendrobiumane D	Others	Others	-
422	600.27	454.24	599.263	C34H37N3O7	[M+H]+	Di-p-coumaroylcaffeoyl Spermidine	Alkaloids	Phenolamine	-
423	614.29	468.25	613.278	C35H39N3O7	[M+H]+	Di-p-coumaroylferuloyl Spermidine	Alkaloids	Phenolamine	-
424	593.19	285.08	594.195	C28H34O14	[M-H]-	Didymin (Isosakuranetin-7-O-rutinoside)*	Flavonoids	Flavanones	14259-47-3
425	106.09	88.08	105.079	C4H11NO2	[M+H]+	Diethanolamine	Alkaloids	Alkaloids	111-42-2
426	644.31	468.25	643.289	C36H41N3O8	[M+H]+	Diferuloyl-p-coumaroyl Spermidine	Alkaloids	Phenolamine	-
427	427.2	247.13	428.205	C21H32O9	[M-H]-	Dihydroabscisic Acid 4'-O-glucoside	Organic acids	Organic acids	-
428	343.1	181.05	344.111	C15H20O9	[M-H]-	Dihydrocaffeoylglucose*	Phenolic acids	Phenolic acids	-
429	302.14	103.05	301.131	C17H19NO4	[M+H]+	Dihydrocaffeoyltyramine	Alkaloids	Phenolamine	-
430	361.17	135.08	360.157	C20H24O6	[M+H]+	Dihydrodehydrodiconiferyl alcohol	Lignans and Coumarins	Lignans	126253-41-6
431	195.07	136.05	196.074	C10H12O4	[M-H]-	Dihydroferulic Acid	Phenolic acids	Phenolic acids	1135-23-5
432	357.12	195.07	358.126	C16H22O9	[M-H]-	Dihydroferulic acid glucoside	Phenolic acids	Phenolic acids	-
433	147.08	115.05	146.073	C10H10O	[M+H]+	Dihydronaphthalenone	Others	Ketone compounds	530-93-8
434	281.14	171.12	282.147	C15H22O5	[M-H]-	Dihydrophaseic acid	Terpenoids	Sesquiterpenoids	41756-77-8
435	279.16	149.02	278.152	C16H22O4	[M+H]+	Diisobutyl phthalate*	Phenolic acids	Phenolic acids	84-69-5
436	195.06	163.04	194.058	C10H10O4	[M+H]+	Dimethyl phthalate	Phenolic acids	Phenolic acids	131-11-3
437	131.035	87.0459	132.042	C5H8O4	[M-H]-	Dimethylmalonic acid*	Organic acids	Organic acids	595-46-0
438	170.1	93.06	169.089	C12H11N	[M+H]+	Diphenylamine	Alkaloids	Alkaloids	122-39-4
439	345.17	137.06	344.162	C20H24O5	[M+H]+	Divanillyltetrahydrofuran	Lignans and Coumarins	Lignans	-
440	199.17	199.17	200.178	C12H24O2	[M-H]-	Dodecanoic acid (Lauric acid)	Lipids	Free fatty acids	143-07-7
441	181.07	101.02	182.079	C6H14O6	[M-H]-	Dulcitol*	Others	Saccharides	608-66-2
442	487.34	423.33	486.334	C30H46O5	[M+H]+	Elaeocarpucin G	Terpenoids	Triterpene	-
443	293.18	221.15	294.183	C17H26O4	[M-H]-	Embelin	Quinones	Quinones	550-24-3
444	457.078	169.014	458.085	C22H18O11	[M-H]-	Epigallocatechin-3-O-gallate*	Flavonoids	Flavanols	989-51-5
445	337.31	337.31	338.318	C22H42O2	[M-H]-	Erucic acid	Lipids	Free fatty acids	112-86-7
446	375.15	327.12	376.152	C20H24O7	[M-H]-	Erythro-Guaiacylglycerol-β-Coniferyl Ether	Lignans and Coumarins	Lignans	890317-92-7
447	405.15	165.06	406.163	C21H26O8	[M-H]-	Erythro-Guaiacylglycerol-β-Sinapyl Ether	Lignans and Coumarins	Lignans	877875-96-2
448	439.16	195.07	440.168	C21H28O10	[M-H]-	Erythro-Guaiacylglycerol-β-threo-syringylglycerol Ether	Lignans and Coumarins	Lignans	1313434-74-0
449	119.04	59.01	120.042	C4H8O4	[M-H]-	Erythrose	Others	Saccharides	583-50-6
450	351.072	105.1	352.079	C16H16O9	[M-H]-	Esculetin-7-O-quinic acid	Lignans and Coumarins	Coumarins	-
451	197.08	65.04	196.074	C10H12O4	[M+H]+	Ethyl Vanillate	Phenolic acids	Phenolic acids	617-05-0
452	131.03	87.05	132.042	C5H8O4	[M-H]-	Ethylmalonic acid*	Organic acids	Organic acids	601-75-2
453	165.06	92.03	166.063	C9H10O3	[M-H]-	Ethylparaben	Phenolic acids	Phenolic acids	120-47-8
454	187.1	169.09	188.105	C9H16O4	[M-H]-	Eucommiol	Others	Alcohol compounds	55930-44-4
455	349.15	187.1	350.158	C15H26O9	[M-H]-	Eucommioside	Terpenoids	Terpene	-
456	193.05	134.04	194.058	C10H10O4	[M-H]-	Ferulic acid*	Phenolic acids	Phenolic acids	537-98-4
457	355.1	193.05	356.111	C16H20O9	[M-H]-	Ferulic acid-4-O-glucoside	Phenolic acids	Phenolic acids	117405-51-3
458	355.1	193.05	356.111	C16H20O9	[M-H]-	Ferulic β-glucoside	Phenolic acids	Phenolic acids	14364-12-6
459	375.11	137.1	374.1	C19H18O8	[M+H]+	Feruloyl syringic acid	Phenolic acids	Phenolic acids	-
460	455.1	96.97	456.105	C17H21N4O9P	[M-H]-	Flavin Single Nucleotide(FMN)	Nucleotides and derivatives	Nucleotides and derivatives	6184-17-4
461	115	71.01	116.011	C4H4O4	[M-H]-	Fumaric acid	Organic acids	Organic acids	110-17-8
462	271.06	149.02	270.053	C15H10O5	[M+H]+	Furo(2,3-f)-1,3-bewnzodioxole	Phenolic acids	Phenolic acids	-
463	277.18	205.16	278.188	C17H26O3	[M-H]-	Fusarester B	Others	Ketone compounds	-
464	287.06	149.02	288.063	C15H12O6	[M-H]-	Fustin	Flavonoids	Flavanonols	20725-03-5
465	457.08	169.01	458.085	C22H18O11	[M-H]-	Gallocatechin 3-O-gallate*	Flavonoids	Flavanols	5127-64-0
466	295.13	120.08	294.122	C14H18N2O5	[M+H]+	Gamma-Glu-Phe*	Amino acids and derivatives	Amino acids and derivatives	7432-24-8
467	227.09	149.06	226.084	C11H14O5	[M+H]+	Genipin	Terpenoids	Monoterpenoids	6902-77-8
468	204.1	84.04	203.091	C7H13N3O4	[M+H]+	Gln-Gly	Amino acids and derivatives	Amino acids and derivatives	2650-65-9
469	505.17	145.05	504.169	C18H32O16	[M+H]+	Glucan	Others	Saccharides	9041-22-9
470	293.12	131.07	294.132	C12H22O8	[M-H]-	Glucosyl 2-Hydroxy-4-Methylpentanoic Acid	Organic acids	Organic acids	-
471	409.21	187.13	350.194	C16H30O8	[M+CH3COOH-H]-	Glucosyl 3,7-dimethyloct-2-ene-1,6,7-triol	Others	Others	-
472	363.17	201.11	364.173	C16H28O9	[M-H]-	Glucosyl 6,9-dihydroxydec-4-enoic acid	Others	Others	-
473	365.18	203.13	366.189	C16H30O9	[M-H]-	Glucosyl 7-methyl-3-methyleneoctane-1,2,6,7-tetraol	Others	Others	-
474	361.19	199.13	362.194	C17H30O8	[M-H]-	Glucosyl 9-hydroxy-3-methyldec-2-enoic acid	Others	Others	-
475	359.1	197.05	360.106	C15H20O10	[M-H]-	Glucosyringic acid	Phenolic acids	Phenolic acids	33228-65-8
476	131.035	87.0452	132.042	C5H8O4	[M-H]-	Glutaric acid*	Organic acids	Organic acids	110-94-1
477	223.11	120.08	222.1	C11H14N2O3	[M+H]+	Glycylphenylalanine*	Amino acids and derivatives	Amino acids and derivatives	3321-03-7
478	567.1	319.05	566.091	C24H22O16	[M+H]+	Gossypetin-3-O-(6''-malonyl)glucoside*	Flavonoids	Flavonols	-
479	481.1	319.05	480.09	C21H20O13	[M+H]+	Gossypetin-3-O-glucoside*	Flavonoids	Flavonols	-
480	465.1	303.05	464.096	C21H20O12	[M+H]+	Gossypetin-7-O-rhamnoside; Rhodiolgin	Flavonoids	Flavonols	94696-39-6
481	315.11	153.05	316.116	C14H20O8	[M-H]-	Grevilloside G*	Phenolic acids	Phenolic acids	791846-69-0
482	525.16	167.03	526.169	C24H30O13	[M-H]-	Guaiacylglycerol 8-O-(1''-O-Glucosyl)Vanillic Acid Ether	Phenolic acids	Phenolic acids	-
483	319.12	241.05	320.126	C17H20O6	[M-H]-	Guaiacylglycerol-β-Guaiacyl Ether	Lignans and Coumarins	Lignans	7382-59-4
484	284.1	152.06	283.092	C10H13N5O5	[M+H]+	Guanosine	Nucleotides and derivatives	Nucleotides and derivatives	118-00-3
485	364.07	152.06	363.058	C10H14N5O8P	[M+H]+	Guanosine 5'-monophosphate	Nucleotides and derivatives	Nucleotides and derivatives	85-32-5
486	465.14	303.09	464.132	C22H24O11	[M+H]+	Hesperetin-3'-O-glucoside	Flavonoids	Flavanones	-
487	463.12	301.07	464.132	C22H24O11	[M-H]-	Hesperetin-5-O-glucoside	Flavonoids	Flavanones	69651-80-5
488	611.2	303.09	610.19	C28H34O15	[M+H]+	Hesperetin-7-O-neohesperidoside(Neohesperidin)	Flavonoids	Flavanones	13241-33-3
489	609.18	301.09	610.19	C28H34O15	[M-H]-	Hesperetin-7-O-rutinoside (Hesperidin)	Flavonoids	Flavanones	520-26-3
490	285.21	223.21	286.214	C16H30O4	[M-H]-	Hexadecanedioic acid	Lipids	Free fatty acids	505-54-4
491	286.31	268.3	285.303	C18H39NO	[M+H]+	Hexadecyl ethanolamine	Alkaloids	Alkaloids	-
492	274.27	256.27	273.267	C16H35NO2	[M+H]+	Hexadecylsphingosine	Lipids	Sphingolipids	-
493	361.15	155.11	302.138	C15H18N4O3	[M+CH3COO]-	His-Phe	Amino acids and derivatives	Amino acids and derivatives	16874-81-0
494	142.1	124.09	141.09	C6H11N3O	[M+H]+	Histidinol	Alkaloids	Alkaloids	501-28-0
495	189.13	144.1	188.127	C7H16N4O2	[M+H]+	Homoarginine	Amino acids and derivatives	Amino acids and derivatives	156-86-5
496	130.09	70.07	129.079	C6H11NO2	[M+H]+	Homoproline	Amino acids and derivatives	Amino acids and derivatives	56879-46-0
497	311.22	223.17	312.23	C18H32O4	[M-H]-	Hydroperoxylinoleic acid*	Lipids	Free fatty acids	34444-18-3
498	313.24	183.14	314.246	C18H34O4	[M-H]-	Hydroxy ricinoleic acid	Lipids	Free fatty acids	-
499	167.11	91.05	166.099	C10H14O2	[M+H]+	Hydroxycarvine	Terpenoids	Monoterpenoids	-
500	531.11	369.06	530.106	C25H22O13	[M+H]+	Hydroxydaphnoretin glucoside	Lignans and Coumarins	Coumarins	-
501	103.004	59.0136	104.011	C3H4O4	[M-H]-	Hydroxypyruvic acid*	Organic acids	Organic acids	1113-60-6
502	137.05	119.04	136.038	C5H4N4O	[M+H]+	Hypoxanthine	Nucleotides and derivatives	Nucleotides and derivatives	68-94-0
503	246.15	86.1	245.138	C10H19N3O4	[M+H]+	Ile-Asn	Amino acids and derivatives	Amino acids and derivatives	59652-59-4
504	279.17	86.1	278.163	C15H22N2O3	[M+H]+	Ile-Phe	Amino acids and derivatives	Amino acids and derivatives	-
505	127.05	81.04	126.043	C5H6N2O2	[M+H]+	Imidazol-1-yl-acetic acid*	Alkaloids	Alkaloids	22884-10-2
506	127.05	81.04	126.043	C5H6N2O2	[M+H]+	Imidazole-4-Acetic Acid*	Alkaloids	Alkaloids	645-65-8
507	146.06	91.05	145.053	C9H7NO	[M+H]+	Indole-3-carboxaldehyde	Alkaloids	Plumerane	487-89-8
508	160.04	116.05	161.048	C9H7NO2	[M-H]-	Indole-3-carboxylic acid*	Alkaloids	Plumerane	771-50-6
509	160.04	116.05	161.048	C9H7NO2	[M-H]-	Indole-5-carboxylic acid*	Alkaloids	Plumerane	1670-81-1
510	269.09	137.05	268.081	C10H12N4O5	[M+H]+	Inosine	Nucleotides and derivatives	Nucleotides and derivatives	58-63-9
511	349.05	137.05	348.047	C10H13N4O8P	[M+H]+	Inosine 5'-monophosphate	Nucleotides and derivatives	Nucleotides and derivatives	131-99-7
512	179.06	87.01	180.063	C6H12O6	[M-H]-	Inositol	Others	Saccharides	87-89-8
513	599.4	337.21	598.387	C36H54O7	[M+H]+	Integracide H	Terpenoids	Triterpene	-
514	191.02	111.01	192.027	C6H8O7	[M-H]-	Isocitric Acid	Organic acids	Organic acids	320-77-4
515	515.12	111.01	516.133	C18H28O17	[M-H]-	Isocitric acid-1-O-diglucoside	Organic acids	Organic acids	-
516	193.051	134.037	194.058	C10H10O4	[M-H]-	Isoferulic Acid*	Phenolic acids	Phenolic acids	25522-33-2
517	385.11	223.06	384.106	C17H20O10	[M+H]+	Isofraxidin-7-O-glucoside	Lignans and Coumarins	Coumarins	483-91-0
518	152.06	135.03	151.049	C5H5N5O	[M+H]+	Isoguanine	Nucleotides and derivatives	Nucleotides and derivatives	3373-53-3
519	433.11	313.07	434.121	C21H22O10	[M-H]-	Isohemiphloin	Flavonoids	Flavanones	3682-02-8
520	341.109	89.0249	342.116	C12H22O11	[M-H]-	Isomaltulose*	Others	Saccharides	13718-94-0
521	124.04	80.05	123.032	C6H5NO2	[M+H]+	Isonicotinic acid	Others	Vitamin	55-22-1
522	301.22	301.22	302.225	C20H30O2	[M-H]-	Isopimaric acid*	Terpenoids	Ditepenoids	5835-26-7
523	711.17	317.06	710.169	C31H34O19	[M+H]+	Isorhamnetin-3-O-(6''-malonyl)glucoside-7-O-rhamnoside	Flavonoids	Flavonols	-
524	479.12	317.07	478.111	C22H22O12	[M+H]+	Isorhamnetin-3-O-Glucoside*	Flavonoids	Flavonols	5041-82-7
525	625.18	317.07	624.169	C28H32O16	[M+H]+	Isorhamnetin-3-O-glucoside-7-O-rhamnoside	Flavonoids	Flavonols	17331-71-4
526	625.17	317.07	624.169	C28H32O16	[M+H]+	Isorhamnetin-3-O-neohesperidoside*	Flavonoids	Flavonols	55033-90-4
527	625.18	317.07	624.169	C28H32O16	[M+H]+	Isorhamnetin-3-O-rutinoside*	Flavonoids	Flavonols	604-80-8
528	771.23	317.07	770.227	C34H42O20	[M+H]+	Isorhamnetin-3-O-rutinoside-7-O-rhamnoside	Flavonoids	Flavonols	-
529	355.1	163.04	354.095	C16H18O9	[M+H]+	Isoscopoletin-β-D-glucoside	Lignans and Coumarins	Coumarins	20186-29-2
530	153.05	65.04	152.047	C8H8O3	[M+H]+	Isovanillin	Others	Aldehyde compounds	621-59-0
531	355.11	193.05	356.111	C16H20O9	[M-H]-	Juglanoside E	Others	Others	-
532	593.13	285.04	594.137	C30H26O13	[M-H]-	Kaempferol-3-O-(6''-p-Coumaroyl)glucoside (Tiliroside)	Flavonoids	Flavonols	20316-62-5
533	449.11	287.06	448.101	C21H20O11	[M+H]+	Kaempferol-3-O-glucoside (Astragalin)*	Flavonoids	Flavonols	480-10-4
534	595.17	287.06	594.159	C27H30O15	[M+H]+	Kaempferol-3-O-glucoside-7-O-rhamnoside*	Flavonoids	Flavonols	2392-95-2
535	449.11	287.06	448.101	C21H20O11	[M+H]+	Kaempferol-3-O-mannoside（Amoenin）	Flavonoids	Flavonols	-
536	595.16	287.06	594.159	C27H30O15	[M+H]+	Kaempferol-3-O-neohesperidoside*	Flavonoids	Flavonols	32602-81-6
537	595.17	287.06	594.159	C27H30O15	[M+H]+	Kaempferol-3-O-robinobioside(Biorobin)*	Flavonoids	Flavonols	17297-56-2
538	581.15	287.06	580.143	C26H28O15	[M+H]+	Kaempferol-3-O-sambubioside	Flavonoids	Flavonols	27661-51-4
539	581.15	287.05	580.143	C26H28O15	[M+H]+	Kaempferol-3-O-xylosyl(1→2)glucoside	Flavonoids	Flavones	-
540	449.11	287.06	448.101	C21H20O11	[M+H]+	Kaempferol-4'-O-glucoside*	Flavonoids	Flavonols	52222-74-9
541	301.22	301.22	302.225	C20H30O2	[M-H]-	Kaurenoic Acid*	Terpenoids	Ditepenoids	6730-83-2
542	221.16	221.15	222.162	C14H22O2	[M-H]-	Kobusone	Terpenoids	Sesquiterpenoids	24173-71-5
543	237.12	120.09	236.116	C12H16N2O3	[M+H]+	L-Alanyl-L-Phenylalanine	Amino acids and derivatives	Amino acids and derivatives	3061-90-3
544	151.06	59.01	152.069	C5H12O5	[M-H]-	L-Arabitol	Others	Saccharides	7643-75-6
545	175.12	116.07	174.112	C6H14N4O2	[M+H]+	L-Arginine	Amino acids and derivatives	Amino acids and derivatives	74-79-3
546	133.06	74.02	132.054	C4H8N2O3	[M+H]+	L-Asparagine	Amino acids and derivatives	Amino acids and derivatives	70-47-3
547	134.04	74.02	133.037	C4H7NO4	[M+H]+	L-Aspartic acid	Amino acids and derivatives	Amino acids and derivatives	56-84-8
548	458.15	116.03	457.143	C16H27NO14	[M+H]+	L-Aspartic acid-O-diglucoside	Amino acids and derivatives	Amino acids and derivatives	-
549	281.11	166.09	280.106	C13H16N2O5	[M+H]+	L-Aspartyl-L-Phenylalanine	Amino acids and derivatives	Amino acids and derivatives	13433-09-5
550	102.05	56.05	101.048	C4H7NO2	[M+H]+	L-Azetidine-2-carboxylic acid	Alkaloids	Alkaloids	2133-34-8
551	162.11	85.03	161.105	C7H15NO3	[M+H]+	L-Carnitine	Alkaloids	Alkaloids	541-15-1
552	227.11	156.08	226.107	C9H14N4O3	[M+H]+	L-Carnosine	Amino acids and derivatives	Amino acids and derivatives	305-84-0
553	176.1	113.07	175.096	C6H13N3O3	[M+H]+	L-Citrulline	Amino acids and derivatives	Amino acids and derivatives	372-75-8
554	144.1	98.09	143.095	C7H13NO2	[M+H]+	L-Cyclopentylglycine	Amino acids and derivatives	Amino acids and derivatives	2521-84-8
555	241.03	151.98	240.024	C6H12N2O4S2	[M+H]+	L-Cystine	Amino acids and derivatives	Amino acids and derivatives	56-89-3
556	179.056	59.0141	180.063	C6H12O6	[M-H]-	L-Glucose*	Others	Saccharides	921-60-8
557	148.06	84.04	147.053	C5H9NO4	[M+H]+	L-Glutamic acid	Amino acids and derivatives	Amino acids and derivatives	56-86-0
558	147.08	84.04	146.069	C5H10N2O3	[M+H]+	L-Glutamine	Amino acids and derivatives	Amino acids and derivatives	56-85-9
559	307.11	145.06	308.122	C11H20N2O8	[M-H]-	L-Glutamine-O-glycoside	Amino acids and derivatives	Amino acids and derivatives	-
560	260.16	242.15	259.153	C11H21N3O4	[M+H]+	L-Glutaminyl-L-isoleucine	Amino acids and derivatives	Amino acids and derivatives	86416-45-7
561	189.12	86.1	188.116	C8H16N2O3	[M+H]+	L-Glycyl-L-isoleucine	Amino acids and derivatives	Amino acids and derivatives	19461-38-2
562	223.11	120.09	222.1	C11H14N2O3	[M+H]+	L-Glycyl-L-phenylalanine*	Amino acids and derivatives	Amino acids and derivatives	721-66-4
563	156.08	110.07	155.07	C6H9N3O2	[M+H]+	L-Histidine	Amino acids and derivatives	Amino acids and derivatives	71-00-1
564	269.06	136.04	268.055	C8H16N2O4S2	[M+H]+	L-Homocystine	Amino acids and derivatives	Amino acids and derivatives	626-72-2
565	164.07	56.05	163.067	C6H13NO2S	[M+H]+	L-Homomethionine	Amino acids and derivatives	Amino acids and derivatives	25148-30-5
566	120.07	74.06	119.058	C4H9NO3	[M+H]+	L-Homoserine	Amino acids and derivatives	Amino acids and derivatives	672-15-1
567	247.13	86.09	246.122	C10H18N2O5	[M+H]+	L-Isoleucyl-L-Aspartate	Amino acids and derivatives	Amino acids and derivatives	-
568	279.17	120.08	278.163	C15H22N2O3	[M+H]+	L-Leucyl-L-phenylalanine	Amino acids and derivatives	Amino acids and derivatives	56217-82-4
569	147.11	84.08	146.106	C6H14N2O2	[M+H]+	L-Lysine	Amino acids and derivatives	Amino acids and derivatives	56-87-1
570	133.01	71.01	134.022	C4H6O5	[M-H]-	L-Malic acid*	Organic acids	Organic acids	97-67-6
571	150.06	61.01	149.051	C5H11NO2S	[M+H]+	L-Methionine	Amino acids and derivatives	Amino acids and derivatives	63-68-3
572	166.05	102.06	165.046	C5H11NO3S	[M+H]+	L-Methionine Sulfoxide	Amino acids and derivatives	Amino acids and derivatives	3226-65-1
573	132.1	86.1	131.095	C6H13NO2	[M+H]+	L-Norleucine*	Amino acids and derivatives	Amino acids and derivatives	327-57-1
574	133.1	116.07	132.09	C5H12N2O2	[M+H]+	L-Ornithine	Amino acids and derivatives	Amino acids and derivatives	70-26-8
575	166.09	120.08	165.079	C9H11NO2	[M+H]+	L-Phenylalanine	Amino acids and derivatives	Amino acids and derivatives	63-91-2
576	130.09	84.08	129.079	C6H11NO2	[M+H]+	L-Pipecolic Acid	Organic acids	Organic acids	3105-95-1
577	116.07	70.07	115.063	C5H9NO2	[M+H]+	L-Proline	Amino acids and derivatives	Amino acids and derivatives	147-85-3
578	229.15	70.07	228.147	C11H20N2O3	[M+H]+	L-Prolyl-L-Leucine	Amino acids and derivatives	Amino acids and derivatives	52899-07-7
579	263.14	70.06	262.132	C14H18N2O3	[M+H]+	L-Prolyl-L-Phenylalanine	Amino acids and derivatives	Amino acids and derivatives	13589-02-1
580	106.05	70.03	105.043	C3H7NO3	[M+H]+	L-Serine	Amino acids and derivatives	Amino acids and derivatives	56-45-1
581	219.13	60.04	218.127	C9H18N2O4	[M+H]+	L-Seryl-L-Isoleucine	Amino acids and derivatives	Amino acids and derivatives	91086-51-0
582	149.01	87.01	150.016	C4H6O6	[M-H]-	L-Tartaric acid	Organic acids	Organic acids	87-69-4
583	175.11	84.04	174.1	C7H14N2O3	[M+H]+	L-Theanine	Amino acids and derivatives	Amino acids and derivatives	3081-61-6
584	203.08	116.05	204.09	C11H12N2O2	[M-H]-	L-Tryptophan	Amino acids and derivatives	Amino acids and derivatives	73-22-3
585	138.09	77.04	137.084	C8H11NO	[M+H]+	L-Tyramine	Alkaloids	Alkaloids	51-67-2
586	196.1	91.05	195.089	C10H13NO3	[M+H]+	L-Tyrosine methyl ester	Amino acids and derivatives	Amino acids and derivatives	1080-06-4
587	182.08	136.08	181.074	C9H11NO3	[M+H]+	L-Tyrosine*	Amino acids and derivatives	Amino acids and derivatives	60-18-4
588	267.1	78.96	268.106	C12H16N2O5	[M-H]-	L-Tyrosyl-L-serine	Amino acids and derivatives	Amino acids and derivatives	13588-99-3
589	118.09	72.08	117.079	C5H11NO2	[M+H]+	L-Valine	Amino acids and derivatives	Amino acids and derivatives	72-18-4
590	231.17	72.08	230.163	C11H22N2O3	[M+H]+	L-Valyl-L-Leucine	Amino acids and derivatives	Amino acids and derivatives	3989-97-7
591	265.15	72.08	264.147	C14H20N2O3	[M+H]+	L-Valyl-L-Phenylalanine	Amino acids and derivatives	Amino acids and derivatives	3918-92-1
592	149.05	59.02	150.053	C5H10O5	[M-H]-	L-Xylose*	Others	Saccharides	609-06-3
593	277.1	148.06	276.096	C10H16N2O7	[M+H]+	L-α-Glutamyl-L-Glutamic Acid	Amino acids and derivatives	Amino acids and derivatives	3929-61-1
594	261.14	86.1	260.137	C11H20N2O5	[M+H]+	L-γ-Glutamyl-L-leucine	Amino acids and derivatives	Amino acids and derivatives	2566-39-4
595	230.25	57.07	229.241	C14H31NO	[M+H]+	Lauramine oxide	Others	Others	1643-20-5
596	282.28	114.09	281.272	C18H35NO	[M+H]+	Laurocapram	Alkaloids	Alkaloids	59227-89-3
597	274.28	88.08	273.267	C16H35NO2	[M+H]+	Lauryldiethanolamine	Others	Others	1541-67-9
598	247.13	86.1	246.122	C10H18N2O5	[M+H]+	Leu-Asp	Amino acids and derivatives	Amino acids and derivatives	32949-40-9
599	229.15	116.07	228.147	C11H20N2O3	[M+H]+	Leu-Pro	Amino acids and derivatives	Amino acids and derivatives	-
600	301.22	301.22	302.225	C20H30O2	[M-H]-	Levopimaric acid*	Terpenoids	Ditepenoids	79-54-9
601	343.15	105.03	342.147	C20H22O5	[M+H]+	Lignans Machilin F	Lignans and Coumarins	Lignans	-
602	347.07	332.05	346.069	C17H14O8	[M+H]+	Limocitrin (5,7,4'-trihydroxy-8,3'-dimethoxyflavone)	Flavonoids	Flavonols	489-33-8
603	509.13	347.08	508.122	C23H24O13	[M+H]+	Limocitrin 3-Glucoside*	Flavonoids	Flavones	-
604	595.13	347.08	594.122	C26H26O16	[M+H]+	Limocitrin malonyl glucoside	Flavonoids	Flavonols	-
605	509.13	347.07	508.122	C23H24O13	[M+H]+	Limocitrin-3-O-galactoside*	Flavonoids	Flavonols	-
606	509.13	347.07	508.122	C23H24O13	[M+H]+	Limocitrin-3-O-glucoside	Flavonoids	Flavonols	-
607	509.13	347.07	508.122	C23H24O13	[M+H]+	Limocitrin-7-O-glucoside*	Flavonoids	Flavonols	-
608	655.19	347.07	654.18	C29H34O17	[M+H]+	Limocitrin-7-O-rutinoside*	Flavonoids	Flavonols	-
609	197.12	133.1	196.11	C11H16O3	[M+H]+	Loliolide	Terpenoids	Monoterpenoids	5989-02-6
610	243.09	145.08	242.08	C12H10N4O2	[M+H]+	Lumichrome	Alkaloids	Alkaloids	1086-80-2
611	449.11	287.06	448.101	C21H20O11	[M+H]+	Luteolin-3'-O-glucoside	Flavonoids	Flavones	5154-41-6
612	449.11	287.05	448.101	C21H20O11	[M+H]+	Luteolin-4'-O-glucoside*	Flavonoids	Flavones	6920-38-3
613	611.16	287.06	610.153	C27H30O16	[M+H]+	Luteolin-7,3'-di-O-glucoside	Flavonoids	Flavones	52187-80-1
614	611.16	287.05	610.153	C27H30O16	[M+H]+	Luteolin-7-O-gentiobioside	Flavonoids	Flavones	-
615	449.11	287.06	448.101	C21H20O11	[M+H]+	Luteolin-7-O-glucoside (Cynaroside)*	Flavonoids	Flavones	5373-11-5
616	595.17	287.06	594.159	C27H30O15	[M+H]+	Luteolin-7-O-neohesperidoside (Lonicerin)*	Flavonoids	Flavones	25694-72-8
617	595.17	287.06	594.159	C27H30O15	[M+H]+	Luteolin-7-O-rutinoside*	Flavonoids	Flavones	3563-98-2
618	204.13	84.08	203.127	C8H17N3O3	[M+H]+	Lys-Gly	Amino acids and derivatives	Amino acids and derivatives	7563-03-3
619	468.31	184.07	467.301	C22H46NO7P	[M+H]+	LysoPC 14:0	Lipids	LPC	20559-16-4
620	496.34	184.07	495.332	C24H50NO7P	[M+H]+	LysoPC 16:0	Lipids	LPC	17364-16-8
621	496.34	184.07	495.332	C24H50NO7P	[M+H]+	LysoPC 16:0(2n isomer)	Lipids	LPC	-
622	522.36	184.07	521.348	C26H52NO7P	[M+H]+	LysoPC 18:1	Lipids	LPC	-
623	522.36	184.07	521.348	C26H52NO7P	[M+H]+	LysoPC 18:1(2n isomer)	Lipids	LPC	-
624	520.34	184.07	519.332	C26H50NO7P	[M+H]+	LysoPC 18:2	Lipids	LPC	-
625	520.34	184.07	519.332	C26H50NO7P	[M+H]+	LysoPC 18:2(2n isomer)	Lipids	LPC	-
626	518.32	184.07	517.317	C26H48NO7P	[M+H]+	LysoPC 18:3	Lipids	LPC	-
627	518.32	184.07	517.317	C26H48NO7P	[M+H]+	LysoPC 18:3(2n isomer)	Lipids	LPC	-
628	576.33	502.29	517.317	C26H48NO7P	[M+CH3COO]-	LysoPC(18:3(9Z,12Z,15Z))	Lipids	LPC	-
629	454.29	313.27	453.286	C21H44NO7P	[M+H]+	LysoPE 16:0	Lipids	LPE	53862-35-4
630	454.29	313.27	453.286	C21H44NO7P	[M+H]+	LysoPE 16:0(2n isomer)	Lipids	LPE	-
631	480.31	339.29	479.301	C23H46NO7P	[M+H]+	LysoPE 18:1(2n isomer)*	Lipids	LPE	-
632	480.31	339.29	479.301	C23H46NO7P	[M+H]+	LysoPE 18:1*	Lipids	LPE	89576-29-4
633	478.29	337.27	477.286	C23H44NO7P	[M+H]+	LysoPE 18:2	Lipids	LPE	-
634	478.29	337.27	477.286	C23H44NO7P	[M+H]+	LysoPE 18:2(2n isomer)	Lipids	LPE	-
635	476.28	335.26	475.27	C23H42NO7P	[M+H]+	LysoPE 18:3	Lipids	LPE	-
636	476.28	335.26	475.27	C23H42NO7P	[M+H]+	LysoPE 18:3(2n isomer)	Lipids	LPE	-
637	291.087	139.039	290.079	C15H14O6	[M+H]+	Mahuanin B	Others	Others	-
638	387.13	225.07	388.137	C17H24O10	[M-H]-	Majoroside	Terpenoids	Monoterpenoids	134140-02-6
639	103	59.01	104.011	C3H4O4	[M-H]-	Malonic acid	Organic acids	Organic acids	141-82-2
640	829.28	325.11	828.275	C30H52O26	[M+H]+	Maltopentaose	Others	Saccharides	34620-76-3
641	151.04	107.05	152.047	C8H8O3	[M-H]-	Mandelic acid	Organic acids	Organic acids	90-64-2
642	313.09	101.02	314.1	C14H18O8	[M-H]-	Mandelic acid-β-glucoside	Organic acids	Organic acids	-
643	503.16	383.12	504.169	C18H32O16	[M-H]-	Manninotriose	Others	Saccharides	13382-86-0
644	341.11	113.02	342.116	C12H22O11	[M-H]-	Melibiose	Others	Saccharides	585-99-9
645	281.1	104.05	280.091	C10H20N2O3S2	[M+H]+	Met-Met	Amino acids and derivatives	Amino acids and derivatives	7349-78-2
646	469.17	195.07	470.179	C22H30O11	[M-H]-	Methoxy-erythro-Guaiacyl glycerol β-threo-syringyl glycerol ether	Lignans and Coumarins	Lignans	-
647	206.08	145.05	205.074	C11H11NO3	[M+H]+	Methoxyindoleacetic acid	Alkaloids	Plumerane	3471-31-6
648	411.33	205.16	412.334	C28H44O2	[M-H]-	Methyl (4E,6E,8E,10E,13Z,18E)-5,7,9,11,13,16,17-heptamethylicosa-4,6,8,10,13,18-hexaenoate	Others	Others	-
649	181.05	135.04	182.058	C9H10O4	[M-H]-	Methyl 2,4-dihydroxyphenylacetate*	Phenolic acids	Phenolic acids	67828-42-6
650	329.09	167.03	330.095	C14H18O9	[M-H]-	Methyl 3-O-glucosyl-4-hydroxybenzoate	Phenolic acids	Phenolic acids	155112-92-8
651	104.07	59.01	103.063	C4H9NO2	[M+H]+	Methyl 3-aminopropanoate	Amino acids and derivatives	Amino acids and derivatives	4138-35-6
652	151.04	136.02	152.047	C8H8O3	[M-H]-	Methyl 4-hydroxybenzoate	Phenolic acids	Phenolic acids	99-76-3
653	163.08	103.05	162.068	C10H10O2	[M+H]+	Methyl Cinnamate	Phenolic acids	Phenolic acids	103-26-4
654	179.07	119.05	178.063	C10H10O3	[M+H]+	Methyl Hydroxycinnamate	Phenolic acids	Phenolic acids	80540-55-2
655	167.07	135.04	166.063	C9H10O3	[M+H]+	Methyl anisate	Phenolic acids	Phenolic acids	121-98-2
656	623.2	315.08	624.205	C29H36O15	[M-H]-	Methylhesperidin	Flavonoids	Flavanones	11013-97-1
657	117.019	73.0295	118.027	C4H6O4	[M-H]-	Methylmalonic acid*	Organic acids	Organic acids	516-05-2
658	313.1	151.04	314.1	C14H18O8	[M-H]-	Methylsalicylate-2-O-glucoside	Phenolic acids	Phenolic acids	10019-60-0
659	331.28	313.27	330.277	C19H38O4	[M+H]+	Monopalmitin*	Lipids	Glycerol ester	542-44-9
660	301.04	151	302.043	C15H10O7	[M-H]-	Morin*	Flavonoids	Flavonols	480-16-0
661	369.12	177.05	368.11	C17H20O9	[M+H]+	Murrayacarpin A glucoside	Lignans and Coumarins	Coumarins	-
662	343.15	163.08	342.147	C20H22O5	[M+H]+	Myricatomentogenin	Others	Others	-
663	567.1	319.04	566.091	C24H22O16	[M+H]+	Myricetin-3-O-(6''-malony)glucoside*	Flavonoids	Flavonols	-
664	481.1	319.06	480.09	C21H20O13	[M+H]+	Myricetin-3-O-galactoside*	Flavonoids	Flavonols	15648-86-9
665	481.1	319.04	480.09	C21H20O13	[M+H]+	Myricetin-3-O-β-D-glucoside*	Flavonoids	Flavonols	19833-12-6
666	227.2	59.01	228.209	C14H28O2	[M-H]-	Myristic Acid	Lipids	Free fatty acids	544-63-8
667	415.21	119.09	414.204	C24H30O6	[M+H]+	Myrtucommulone B	Others	Others	54247-23-3
668	227.12	212.09	226.111	C14H14N2O	[M+H]+	N(2)-methylharmine	Alkaloids	Alkaloids	6519-18-2
669	175.12	70.07	174.137	C8H18N2O2	[M+H]+	N(6),N(6)-Dimethyl-L-lysine	Amino acids and derivatives	Amino acids and derivatives	2259-86-1
670	203.15	70.07	202.143	C8H18N4O2	[M+H]+	N,N'-Dimethylarginine;SDMA*	Amino acids and derivatives	Amino acids and derivatives	30344-00-4
671	104.07	58.07	103.063	C4H9NO2	[M+H]+	N,N-Dimethylglycine*	Amino acids and derivatives	Amino acids and derivatives	1118-68-9
672	293.1	131.05	294.107	C10H18N2O8	[M-H]-	N-(1-Deoxy-1-fructosyl)Asparagine	Amino acids and derivatives	Amino acids and derivatives	-
673	326.12	164.07	327.131	C15H21NO7	[M-H]-	N-(1-Deoxy-1-fructosyl)Phenylalanine	Amino acids and derivatives	Amino acids and derivatives	-
674	365.13	203.08	366.142	C17H22N2O7	[M-H]-	N-(1-Deoxy-1-fructosyl)Tryptophan	Amino acids and derivatives	Amino acids and derivatives	-
675	280.14	216.12	279.132	C11H21NO7	[M+H]+	N-(1-Deoxy-1-fructosyl)Valine	Amino acids and derivatives	Amino acids and derivatives	-
676	266.12	116.07	265.116	C10H19NO7	[M+H]+	N-(1-deoxy-1-xylosyl)valine	Amino acids and derivatives	Amino acids and derivatives	-
677	182.08	91.05	181.074	C9H11NO3	[M+H]+	N-(2-Hydroxy-4-methoxyphenyl)acetamide	Alkaloids	Phenolamine	58469-06-0
678	268.15	136.06	267.147	C14H21NO4	[M+H]+	N-(3-hydroxy-4-methoxyphenethyl)-4-hydroxybutanamide	Alkaloids	Phenolamine	-
679	193.13	105.03	192.126	C11H16N2O	[M+H]+	N-(4-Aminobutyl)benzamide	Alkaloids	Alkaloids	5692-23-9
680	286.09	124.04	285.085	C12H15NO7	[M+H]+	N-(beta-D-Glucosyl)nicotinate*	Others	Vitamin	-
681	404.15	207.06	403.149	C18H21N5O6	[M+H]+	N-(p-hydroxybenzyl) adenosine	Nucleotides and derivatives	Nucleotides and derivatives	-
682	222.1	84.05	221.09	C8H15NO6	[M+H]+	N-Acetyl-D-galactosamine	Others	Saccharides	1811-31-0
683	222.1	138.05	221.09	C8H15NO6	[M+H]+	N-Acetyl-D-glucosamine	Others	Saccharides	7512-17-6
684	222.1	138.05	221.09	C8H15NO6	[M+H]+	N-Acetyl-D-mannosamine	Others	Saccharides	7772-94-3
685	174.04	88.04	175.048	C6H9NO5	[M-H]-	N-Acetyl-L-Aspartic Acid	Amino acids and derivatives	Amino acids and derivatives	997-55-7
686	187.07	125.07	188.08	C7H12N2O4	[M-H]-	N-Acetyl-L-Glutamine	Amino acids and derivatives	Amino acids and derivatives	2490-97-3
687	188.06	128.04	189.064	C7H11NO5	[M-H]-	N-Acetyl-L-glutamic acid	Amino acids and derivatives	Amino acids and derivatives	1188-37-0
688	206.08	58.03	207.089	C11H13NO3	[M-H]-	N-Acetyl-L-phenylalanine	Amino acids and derivatives	Amino acids and derivatives	2018-61-3
689	145.13	86.1	144.126	C7H16N2O	[M+H]+	N-Acetylcadaverine	Alkaloids	Alkaloids	32343-73-0
690	188.04	144.05	189.043	C10H7NO3	[M-H]-	N-Acetylisatin	Alkaloids	Plumerane	574-17-4
691	131.12	114.09	130.111	C6H14N2O	[M+H]+	N-Acetylputrescine	Alkaloids	Alkaloids	18233-70-0
692	286.1	105.03	285.1	C16H15NO4	[M+H]+	N-Benzoyl-(2R,3S)-3-phenylisoserine	Amino acids and derivatives	Amino acids and derivatives	132201-33-3
693	120.08	103.05	119.073	C8H9N	[M+H]+	N-Benzylmethylene isomethylamine	Alkaloids	Alkaloids	-
694	104.07	58.07	103.063	C4H9NO2	[M+H]+	N-Ethylglycine*	Amino acids and derivatives	Amino acids and derivatives	627-01-0
695	290.09	128.04	291.095	C11H17NO8	[M-H]-	N-Fructosyl Pyroglutamate	Amino acids and derivatives	Amino acids and derivatives	-
696	228.23	228.24	227.225	C14H29NO	[M+H]+	N-Isobutyl Decanamide	Alkaloids	Alkaloids	73785-31-6
697	118.09	87.05	117.079	C5H11NO2	[M+H]+	N-Methyl-4-aminobutyric acid	Organic acids	Organic acids	1119-48-8
698	130.09	84.08	129.079	C6H11NO2	[M+H]+	N-Methyl-L-proline	Amino acids and derivatives	Amino acids and derivatives	475-11-6
699	146.08	82.07	145.074	C6H11NO3	[M+H]+	N-Methyl-Trans-4-Hydroxy-L-Proline	Amino acids and derivatives	Amino acids and derivatives	4252-82-8
700	100.08	58.03	99.0684	C5H9NO	[M+H]+	N-Methylpyrrolidone	Others	Others	872-50-4
701	189.13	70.07	188.127	C7H16N4O2	[M+H]+	N-Monomethyl-L-arginine*	Amino acids and derivatives	Amino acids and derivatives	17035-90-4
702	194.08	91.05	193.074	C10H11NO3	[M+H]+	N-Phenylacetylglycine	Amino acids and derivatives	Amino acids and derivatives	500-98-1
703	328.13	310.12	327.132	C15H21NO7	[M+H]+	N-benzoyl-2-aminoethyl-β-D-glucopyranoside	Alkaloids	Alkaloids	-
704	136.07	91.05	135.068	C8H9NO	[M+H]+	N-benzylformamide	Alkaloids	Alkaloids	6343-54-0
705	250.07	88.04	251.079	C12H13NO5	[M-H]-	N-carboxy-N-(2-oxo-2-phenylethyl)-L-alanine	Amino acids and derivatives	Amino acids and derivatives	-
706	180.1	120.08	179.095	C10H13NO2	[M+H]+	N-methylphenylalanine	Amino acids and derivatives	Amino acids and derivatives	-
707	411.19	177.05	410.184	C23H26N2O5	[M+H]+	N-p-Coumaroyl-N'-feruloylputrescine	Alkaloids	Phenolamine	380302-96-5
708	214.071	114.059	215.079	C9H13NO5	[M-H]-	N-succinyl-proline	Amino acids and derivatives	Amino acids and derivatives	-
709	173.11	131.08	174.1	C7H14N2O3	[M-H]-	N-α-Acetyl-L-ornithine	Amino acids and derivatives	Amino acids and derivatives	6205-08-9
710	438.24	292.2	437.231	C25H31N3O4	[M+H]+	N1,N10-Bis(p-coumaroyl)spermidine	Alkaloids	Phenolamine	114916-05-1
711	312.13	180.09	311.123	C12H17N5O5	[M+H]+	N6-(2-Hydroxyethyl)adenosine*	Nucleotides and derivatives	Nucleotides and derivatives	4338-48-1
712	189.12	126.09	188.116	C8H16N2O3	[M+H]+	N6-Acetyl-L-lysine	Amino acids and derivatives	Amino acids and derivatives	692-04-6
713	203.15	70.07	202.143	C8H18N4O2	[M+H]+	NG,NG-Dimethyl-L-arginine*	Amino acids and derivatives	Amino acids and derivatives	30315-93-6
714	273.08	153.02	272.068	C15H12O5	[M+H]+	Naringenin (5,7,4'-Trihydroxyflavanone)	Flavonoids	Flavanones	480-41-1
715	353.09	191.06	354.095	C16H18O9	[M-H]-	Neochlorogenic acid (5-O-Caffeoylquinic acid)*	Phenolic acids	Phenolic acids	906-33-2
716	479.12	317.06	478.111	C22H22O12	[M+H]+	Nepetin-7-O-alloside*	Flavonoids	Flavones	-
717	304.15	185.09	303.143	C12H21N3O6	[M+H]+	Nicotianamine	Alkaloids	Alkaloids	34441-14-0
718	123.06	80.05	122.048	C6H6N2O	[M+H]+	Nicotinamide	Others	Vitamin	98-92-0
719	256.08	124.04	256.082	C11H14NO6+	[M]+	Nicotinate D-ribonucleoside	Others	Vitamin	17720-18-2
720	743.04	217	744.059	C21H27N6O18P3	[M-H]-	Nicotinate adenine dinucleotide phosphate	Nucleotides and derivatives	Nucleotides and derivatives	5502-96-5
721	138.05	78.03	137.048	C7H7NO2	[M+H]+	Nicotinic Acid Methyl Ester(Methyl Nicotinate)	Alkaloids	Pyridine alkaloids	93-60-7
722	124.04	78.03	123.032	C6H5NO2	[M+H]+	Nicotinic acid (Vitamin B3)	Others	Vitamin	59-67-6
723	664.12	136.06	663.109	C21H27N7O14P2	[M+H]+	Nicotinic acid adenine dinucleotide	Nucleotides and derivatives	Nucleotides and derivatives	53-84-9
724	707.4	485.33	708.409	C38H60O12	[M-H]-	Niga-ichigoside F3	Terpenoids	Triterpene Saponin	-
725	403.14	373.1	402.132	C21H22O8	[M+H]+	Nobiletin (5,6,7,8,3',4'-Hexamethoxyflavone)	Flavonoids	Flavones	478-01-3
726	407.13	227.07	408.142	C20H24O9	[M-H]-	Nodakenin	Lignans and Coumarins	Coumarins	495-31-8
727	387.17	207.1	388.173	C18H28O9	[M-H]-	Nuezhengalaside	Terpenoids	Monoterpenoids	-
728	204.13	85.03	203.116	C9H17NO4	[M+H]+	O-Acetyl-L-carnitine	Alkaloids	Alkaloids	3040-38-8
729	148.06	88.04	147.053	C5H9NO4	[M+H]+	O-Acetylserine	Amino acids and derivatives	Amino acids and derivatives	5147-00-2
730	665.19	218.1	666.201	C27H38O19	[M-H]-	O-Caffeoyl maltotriose	Phenolic acids	Phenolic acids	-
731	184.07	125	184.073	C5H15NO4P+	[M]+	O-Phosphocholine	Alkaloids	Alkaloids	107-73-3
732	282.28	69.07	281.272	C18H35NO	[M+H]+	Octadec-2-enamide	Alkaloids	Alkaloids	-
733	279.23	149.13	278.225	C18H30O2	[M+H]+	Octadeca-11E,13E,15Z-trienoic acid	Lipids	Free fatty acids	25575-00-2
734	263.24	81.07	262.23	C18H30O	[M+H]+	Octadeca-2,9,12,15-tetraen-1-ol	Others	Others	-
735	279.23	81.07	278.225	C18H30O2	[M+H]+	Octadeca-9,12,15-trienoic acid	Lipids	Free fatty acids	28290-79-1
736	280.26	81.07	279.256	C18H33NO	[M+H]+	Octadecadienamide	Alkaloids	Alkaloids	-
737	313.24	295.23	314.246	C18H34O4	[M-H]-	Octadecanedioic acid	Lipids	Free fatty acids	871-70-5
738	126.13	67.06	125.12	C8H15N	[M+H]+	Octahydroisoindole	Alkaloids	Alkaloids	21850-12-4
739	509.13	347.08	508.122	C23H24O13	[M+H]+	Okanin-4'-(6''-O-acetyl)glucoside*	Flavonoids	Chalcones	-
740	282.28	247.24	281.272	C18H35NO	[M+H]+	Oleamide (9-Octadecenamide)	Lipids	Free fatty acids	301-02-0
741	569.15	389.09	570.159	C25H30O15	[M-H]-	Oleuropeinic acid	Terpenoids	Monoterpenoids	96382-90-0
742	639.193	477.159	640.2	C29H36O16	[M-H]-	Orobanchoside	Phenolic acids	Phenolic acids	-
743	155.01	111.02	156.017	C5H4N2O4	[M-H]-	Orotic acid (Vitamin B13)	Others	Vitamin	65-86-1
744	88.99	70.98	89.9953	C2H2O4	[M-H]-	Oxalic acid	Organic acids	Organic acids	144-62-7
745	611.14	306.08	612.152	C20H32N6O12S2	[M-H]-	Oxiglutatione	Amino acids and derivatives	Amino acids and derivatives	27025-41-8
746	134.06	106.07	133.053	C8H7NO	[M+H]+	Oxindole	Alkaloids	Plumerane	59-48-3
747	167.07	121.07	166.063	C9H10O3	[M+H]+	Paeonol	Phenolic acids	Phenolic acids	552-41-0
748	239.24	223.24	240.245	C16H32O	[M-H]-	Palmitaldehyde	Lipids	Free fatty acids	629-80-1
749	253.217	235.207	254.225	C16H30O2	[M-H]-	Palmitoleic Acid*	Lipids	Free fatty acids	373-49-9
750	657.17	333.06	656.159	C28H32O18	[M+H]+	Patuletin-3-O-gentiobioside	Flavonoids	Flavonols	-
751	495.11	333.07	494.106	C22H22O13	[M+H]+	Patuletin-3-O-glucoside	Flavonoids	Flavonols	-
752	641.17	317.06	640.164	C28H32O17	[M+H]+	Patuletin-3-O-rutinoside	Flavonoids	Flavonols	-
753	479.12	317.08	478.111	C22H22O12	[M+H]+	Pedaliin*	Flavonoids	Flavones	22860-72-6
754	641.15	317.07	641.15	C31H29O15+	[M]+	Petunidin-3-O-(6''-O-caffeoyl)glucoside	Flavonoids	Anthocyanidins	-
755	625.16	317.07	625.155	C31H29O14+	[M]+	Petunidin-3-O-(6''-O-p-Coumaroyl)glucoside	Flavonoids	Anthocyanidins	-
756	279.12	139.08	280.131	C15H20O5	[M-H]-	Phaseic Acid	Terpenoids	Sesquiterpenoids	24394-14-7
757	253.12	120.09	252.111	C12H16N2O4	[M+H]+	Phe-Ser	Amino acids and derivatives	Amino acids and derivatives	16053-39-7
758	135.05	92.03	136.052	C8H8O2	[M-H]-	Phenyl acetate	Phenolic acids	Phenolic acids	122-79-2
759	325.09	119.05	326.1	C15H18O8	[M-H]-	Phenylpropionic acid-O-β-D-glucopyranoside	Phenolic acids	Phenolic acids	-
760	451.36	89.06	450.35	C31H46O2	[M+H]+	Phylloquinone (Vitamin K1)	Others	Vitamin	84-80-0
761	255.07	151	256.074	C15H12O4	[M-H]-	Pinocembrin (Dihydrochrysin)	Flavonoids	Flavanones	480-39-7
762	681.24	519.19	682.247	C32H42O16	[M-H]-	Pinoresinol-4,4'-O-diglucoside	Lignans and Coumarins	Lignans	63902-38-5
763	519.19	357.14	520.194	C26H32O11	[M-H]-	Pinoresinol-4-O-glucoside	Lignans and Coumarins	Lignans	41607-20-9
764	130.1	56.05	129.079	C6H11NO2	[M+H]+	Pipecolic acid	Alkaloids	Piperidine alkaloids	535-75-1
765	86.1	69.07	85.0891	C5H11N	[M+H]+	Piperidine	Alkaloids	Piperidine alkaloids	110-89-4
766	165.02	91.02	166.027	C8H6O4	[M-H]-	Piperonylic acid	Organic acids	Organic acids	94-53-1
767	505.18	127.03	504.169	C18H32O16	[M+H]+	Planteose	Others	Saccharides	470-57-5
768	593.19	285.08	594.195	C28H34O14	[M-H]-	Poncirin (Isosakuranetin-7-O-neohesperidoside)*	Flavonoids	Flavanones	14941-08-3
769	575.119	285.039	576.127	C30H24O12	[M-H]-	Procyanidin A1	Tannins	Proanthocyanidins	103883-03-0
770	213.12	70.07	212.116	C10H16N2O3	[M+H]+	Prolylproline	Amino acids and derivatives	Amino acids and derivatives	20488-28-2
771	137.02	93.04	138.032	C7H6O3	[M-H]-	Protocatechualdehyde*	Others	Aldehyde compounds	139-85-5
772	167.04	108.02	168.042	C8H8O4	[M-H]-	Protocatechuic Acid Methyl Ester	Phenolic acids	Phenolic acids	2150-43-8
773	417.11	152.01	418.111	C17H22O12	[M-H]-	Protocatechuic acid xylosyl xyloside	Phenolic acids	Phenolic acids	-
774	296.113	85.0281	295.106	C14H17NO6	[M+H]+	Prunasin	Alkaloids	Alkaloids	99-18-3
775	116.07	70.07	115.063	C5H9NO2	[M+H]+	Pterolactam*	Alkaloids	Pyrrole alkaloids	38072-88-7
776	279.23	95.09	278.225	C18H30O2	[M+H]+	Punicic acid (9Z,11E,13Z-octadecatrienoic acid)	Lipids	Free fatty acids	544-72-9
777	188.07	118.07	187.063	C11H9O2N	[M+H]+	Pyran[3,4-b]indole-2-ketone	Alkaloids	Plumerane	-
778	286.09	124.04	285.085	C12H15NO7	[M+H]+	Pyridine-4-formyl-O-β-D-glucopyranoside*	Others	Others	-
779	168.06	150.05	167.058	C8H9NO3	[M+H]+	Pyridoxal	Others	Vitamin	66-72-8
780	170.08	134.06	169.074	C8H11NO3	[M+H]+	Pyridoxine	Others	Vitamin	65-23-6
781	130.05	84.05	129.043	C5H7NO3	[M+H]+	Pyroglutamic acid	Amino acids and derivatives	Amino acids and derivatives	4042-36-8
782	481.1	319.05	480.09	C21H20O13	[M+H]+	Quercetagetin-7-O-glucoside(Quercetagitrin)*	Flavonoids	Flavonols	548-75-4
783	303.05	137.02	302.043	C15H10O7	[M+H]+	Quercetin	Flavonoids	Flavonols	117-39-5
784	597.15	303.05	596.138	C26H28O16	[M+H]+	Quercetin 3-O-glucoside 7-O-xyloside	Flavonoids	Flavonols	-
785	611.16	303.05	610.153	C27H30O16	[M+H]+	Quercetin-3-O-(4''-O-glucosyl)rhamnoside*	Flavonoids	Flavonols	59262-54-3
786	597.14	303.05	596.138	C26H28O16	[M+H]+	Quercetin-3-O-(6''-O-arabinosyl)glucoside	Flavonoids	Flavonols	-
787	465.1	303.06	464.096	C21H20O12	[M+H]+	Quercetin-3-O-alloside; Isohyperoside*	Flavonoids	Flavonols	35589-21-0
788	463.09	300.03	464.096	C21H20O12	[M-H]-	Quercetin-3-O-galactoside (Hyperin)	Flavonoids	Flavonols	482-36-0
789	465.1	303.05	464.096	C21H20O12	[M+H]+	Quercetin-3-O-glucoside (Isoquercitrin)*	Flavonoids	Flavonols	482-35-9
790	611.16	303.05	610.153	C27H30O16	[M+H]+	Quercetin-3-O-glucoside-7-O-rhamnoside*	Flavonoids	Flavonols	-
791	611.16	303.05	610.153	C27H30O16	[M+H]+	Quercetin-3-O-neohesperidoside	Flavonoids	Flavonols	29662-79-1
792	609.15	300.03	610.153	C27H30O16	[M-H]-	Quercetin-3-O-robinobioside	Flavonoids	Flavonols	52525-35-6
793	611.16	303.05	610.153	C27H30O16	[M+H]+	Quercetin-3-O-rutinoside (Rutin)*	Flavonoids	Flavonols	153-18-4
794	627.16	303.06	626.148	C27H30O17	[M+H]+	Quercetin-3-O-sophoroside (Baimaside)	Flavonoids	Flavonols	18609-17-1
795	463.09	301.04	464.096	C21H20O12	[M-H]-	Quercetin-4'-O-glucoside (Spiraeoside)*	Flavonoids	Flavonols	20229-56-5
796	465.1	303.05	464.096	C21H20O12	[M+H]+	Quercetin-5-O-β-D-glucoside*	Flavonoids	Flavonols	-
797	463.09	301.04	464.096	C21H20O12	[M-H]-	Quercetin-7-O-glucoside	Flavonoids	Flavonols	491-50-9
798	611.16	303.05	610.153	C27H30O16	[M+H]+	Quercetin-7-O-rutinoside*	Flavonoids	Flavonols	147714-62-3
799	191.06	85.03	192.063	C7H12O6	[M-H]-	Quinic Acid	Organic acids	Organic acids	77-95-2
800	503.162	179.055	504.169	C18H32O16	[M-H]-	Raffinose*	Others	Saccharides	512-69-6
801	156.1	110.07	155.095	C8H13NO2	[M+H]+	Retronecine	Alkaloids	Pyrrole alkaloids	480-85-3
802	377.15	243.09	376.138	C17H20N4O6	[M+H]+	Riboflavin (Vitamin B2)	Others	Vitamin	83-88-5
803	400.15	136.06	399.139	C15H21N5O8	[M+H]+	Ribosyladenosine	Nucleotides and derivatives	Nucleotides and derivatives	-
804	385.19	223.14	386.194	C19H30O8	[M-H]-	Roseoside	Others	Ketone compounds	54835-70-0
805	190.05	128.05	189.043	C10H7NO3	[M+H]+	Rubusine	Alkaloids	Alkaloids	-
806	281.14	123.08	282.147	C15H22O5	[M-H]-	Rugosic acid A	Others	Others	-
807	611.16	303.06	664.185	C27H36O19	[M-3H2O+H]+	Rutin Trihydrate	Flavonoids	Flavanols	207671-50-9
808	325.11	59.01	326.121	C12H22O10	[M-H]-	Rutinose	Others	Saccharides	90-74-4
809	385.13	250	384.122	C14H20N6O5S	[M+H]+	S-(5'-Adenosy)-L-homocysteine	Amino acids and derivatives	Amino acids and derivatives	979-92-0
810	322.11	130.05	321.099	C11H19N3O6S	[M+H]+	S-(Methyl)glutathione	Amino acids and derivatives	Amino acids and derivatives	2922-56-7
811	399.14	250.09	399.144	C15H23N6O5S+	[M]+	S-Adenosylmethionine	Amino acids and derivatives	Amino acids and derivatives	485-80-3
812	136.04	91.05	135.035	C4H9NO2S	[M+H]+	S-Methyl-L-cysteine	Amino acids and derivatives	Amino acids and derivatives	1187-84-4
813	447.13	285.08	448.137	C22H24O10	[M-H]-	Sakuranin	Flavonoids	Flavanones	529-39-5
814	299.08	137.02	300.084	C13H16O8	[M-H]-	Salicylic acid-2-O-glucoside	Phenolic acids	Phenolic acids	10366-91-3
815	299.11	137.02	300.121	C14H20O7	[M-H]-	Salidroside	Phenolic acids	Phenolic acids	10338-51-9
816	294.1	161.04	295.106	C14H17NO6	[M-H]-	Sambunigrin	Alkaloids	Alkaloids	99-19-4
817	207.07	151.08	206.058	C11H10O4	[M+H]+	Scoparone	Lignans and Coumarins	Coumarins	120-08-1
818	193.05	133.03	192.042	C10H8O4	[M+H]+	Scopoletin (7-Hydroxy-6-methoxycoumarin)	Lignans and Coumarins	Coumarins	92-61-5
819	355.1	193.05	354.095	C16H18O9	[M+H]+	Scopoletin-7-O-glucoside (Scopolin)	Lignans and Coumarins	Coumarins	531-44-2
820	201.11	139.11	202.12	C10H18O4	[M-H]-	Sebacic acid	Organic acids	Organic acids	111-20-6
821	363.18	137.06	362.173	C20H26O6	[M+H]+	Secoisolariciresinol	Lignans and Coumarins	Lignans	29388-59-8
822	523.22	361.14	524.226	C26H36O11	[M-H]-	Secoisolariciresinol 4-O-glucoside	Lignans and Coumarins	Lignans	-
823	317.06	302.04	316.058	C16H12O7	[M+H]+	Selagin	Flavonoids	Flavones	-
824	205.09	149.02	204.079	C12H12O3	[M+H]+	Senkyunolide B*	Others	Lactones	93236-67-0
825	279.16	121.03	278.152	C16H22O4	[M+H]+	Senkyunolide M	Others	Lactones	146986-60-9
826	310.14	166.09	309.132	C14H19N3O5	[M+H]+	Ser-Gly-Phe	Amino acids and derivatives	Amino acids and derivatives	-
827	655.19	347.08	654.18	C29H34O17	[M+H]+	Sesuvioside C*	Flavonoids	Isoflavones	-
828	625.18	317.07	624.169	C28H32O16	[M+H]+	Sexangularetin-3-O-glucoside-7-O-rhamnoside*	Flavonoids	Flavonols	-
829	517.16	175.04	518.164	C22H30O14	[M-H]-	Sibiricose A5*	Phenolic acids	Phenolic acids	107912-97-0
830	371.1	209.05	370.126	C17H22O9	[M+H]+	Sinapaldehyde-4-O-Glucoside	Phenolic acids	Phenolic acids	154461-65-1
831	146.17	72.08	145.158	C7H19N3	[M+H]+	Spermidine	Alkaloids	Alkaloids	124-20-9
832	203.22	84.08	202.216	C10H26N4	[M+H]+	Spermine	Alkaloids	Alkaloids	71-44-3
833	400.249	340.228	399.241	C24H33NO4	[M+H]+	Spiramine I	Alkaloids	Terpenoid alkaloids	-
834	360.254	123.045	359.246	C22H33NO3	[M+H]+	Spiramine N	Alkaloids	Terpenoid alkaloids	-
835	173.08	111.08	174.089	C8H14O4	[M-H]-	Suberic Acid	Organic acids	Organic acids	505-48-6
836	117.02	73.03	118.027	C4H6O4	[M-H]-	Succinic acid*	Organic acids	Organic acids	110-15-6
837	101.02	55.02	100.016	C4H4O3	[M+H]+	Succinic anhydride	Organic acids	Organic acids	108-30-5
838	101.02	55.02	102.032	C4H6O3	[M-H]-	Succinic semialdehyde	Organic acids	Organic acids	692-29-5
839	384.12	252.07	383.108	C14H17N5O8	[M+H]+	Succinyladenosine	Nucleotides and derivatives	Nucleotides and derivatives	4542-23-8
840	305.07	96.96	306.077	C12H18O7S	[M-H]-	Sulfo jasmonate	Others	Others	-
841	509.13	347.08	508.122	C23H24O13	[M+H]+	Syringetin-3-O-glucoside*	Flavonoids	Flavonols	40039-49-4
842	509.13	347.08	508.122	C23H24O13	[M+H]+	Syringetin-7-O-glucoside*	Flavonoids	Flavonols	-
843	197.05	123.01	198.053	C9H10O5	[M-H]-	Syringic acid	Phenolic acids	Phenolic acids	530-57-4
844	343.1	197.05	344.111	C15H20O9	[M-H]-	Syringic acid 4-O-rhamnoside	Lignans and Coumarins	Lignans	-
845	371.13	209.08	372.142	C17H24O9	[M-H]-	Syringin	Phenolic acids	Phenolic acids	118-34-3
846	479.12	317.06	478.111	C22H22O12	[M+H]+	Tamarixetin-3-O-glucoside (Tamarixin)	Flavonoids	Flavonols	27542-39-8
847	625.18	317.07	624.169	C28H32O16	[M+H]+	Tamarixetin-3-O-glucoside-7-O-rhamnoside*	Flavonoids	Flavonols	-
848	373.13	343.09	372.121	C20H20O7	[M+H]+	Tangeretin (4',5,6,7,8-Pentamethoxyflavone)*	Flavonoids	Flavones	481-53-8
849	103	59.01	104.011	C3H4O4	[M-H]-	Tartronate semialdehyde*	Organic acids	Organic acids	2480-77-5
850	165.02	121.03	166.027	C8H6O4	[M-H]-	Terephthalic acid	Phenolic acids	Phenolic acids	100-21-0
851	246.24	88.08	245.236	C14H31NO2	[M+H]+	Tetradecasphinganine	Others	Others	-
852	302.3	88.08	301.298	C18H39NO2	[M+H]+	Tetradecyldiethanolamine	Alkaloids	Alkaloids	18924-66-8
853	272.11	110.06	271.106	C12H17NO6	[M+H]+	Tetraphyllin A*	Alkaloids	Isoquinoline alkaloids	-
854	265.11	122.07	265.112	C12H17N4OS+	[M]+	Thiamine (Vitamin B1)	Others	Vitamin	70-16-6
855	306.14	188.07	305.138	C15H19N3O4	[M+H]+	Thr-Trp	Amino acids and derivatives	Amino acids and derivatives	186761-42-2
856	243.1	127.05	242.09	C10H14N2O5	[M+H]+	Thymidine	Nucleotides and derivatives	Nucleotides and derivatives	50-89-5
857	127.05	110.02	126.043	C5H6N2O2	[M+H]+	Thymine	Nucleotides and derivatives	Nucleotides and derivatives	65-71-4
858	329.23	211.13	330.241	C18H34O5	[M-H]-	Tianshic acid	Organic acids	Organic acids	-
859	290.09	128.03	291.097	C12H13N5O4	[M-H]-	Toyocamycin	Nucleotides and derivatives	Nucleotides and derivatives	606-58-6
860	681.383	501.326	682.393	C36H58O12	[M-H]-	Trachelosperonide B-1	Terpenoids	Triterpene Saponin	-
861	132.07	86.06	131.058	C5H9NO3	[M+H]+	Trans-4-Hydroxy-L-proline	Amino acids and derivatives	Amino acids and derivatives	51-35-4
862	287.2	269.21	288.209	C19H28O2	[M-H]-	Trans-dehydrorosinone	Others	Ketone compounds	53-43-0
863	584.28	438.24	583.268	C34H37N3O6	[M+H]+	Tri-p-coumaroyl Spermidine	Alkaloids	Phenolamine	-
864	521.09	329.2	522.101	C23H22O14	[M-H]-	Tricin-7-O-saccharic acid	Flavonoids	Flavones	-
865	243.16	181.16	244.167	C13H24O4	[M-H]-	Tridecanedioic acid	Lipids	Free fatty acids	505-52-2
866	138.06	94.07	137.048	C7H7NO2	[M+H]+	Trigonelline	Alkaloids	Pyridine alkaloids	535-83-1
867	189.16	84.08	188.153	C9H20N2O2	[M+H]+	Trimethyllysine	Amino acids and derivatives	Amino acids and derivatives	23284-33-5
868	165.055	103.055	166.063	C9H10O3	[M-H]-	Tropic acid	Organic acids	Organic acids	552-63-6
869	387.17	207.11	388.173	C18H28O9	[M-H]-	Tuberonic acid glucoside	Organic acids	Organic acids	120399-24-8
870	137.06	119.05	138.068	C8H10O2	[M-H]-	Tyrosol; 4-Hydroxyphenylethanol	Phenolic acids	Phenolic acids	501-94-0
871	295.16	136.08	294.158	C15H22N2O4	[M+H]+	Tyrosylleucine	Amino acids and derivatives	Amino acids and derivatives	17355-10-1
872	215.13	153.13	216.136	C11H20O4	[M-H]-	Undecanedioic acid	Lipids	Free fatty acids	1852-04-6
873	243.06	110.02	244.07	C9H12N2O6	[M-H]-	Uridine	Nucleotides and derivatives	Nucleotides and derivatives	58-96-8
874	402.99	158.93	404.002	C9H14N2O12P2	[M-H]-	Uridine 5'-diphosphate	Nucleotides and derivatives	Nucleotides and derivatives	27821-45-0
875	144.14	57.07	143.131	C8H17NO	[M+H]+	Valpromide	Alkaloids	Alkaloids	2430-27-5
876	167.03	108.02	168.042	C8H8O4	[M-H]-	Vanillic acid	Phenolic acids	Phenolic acids	121-34-6
877	181.05	107.01	182.058	C9H10O4	[M-H]-	Vanillic acid methyl ester	Phenolic acids	Phenolic acids	3943-74-6
878	195.06	93.03	194.058	C10H10O4	[M+H]+	Vanillin acetate	Phenolic acids	Phenolic acids	881-68-5
879	151.04	136.02	152.047	C8H8O3	[M-H]-	Vanillin; 4-Hydroxy-3-Methoxybenzaldehyde	Others	Aldehyde compounds	121-33-5
880	154.09	137.06	153.079	C8H11NO2	[M+H]+	Vanillylamine	Alkaloids	Phenolamine	1196-92-5
881	167.07	124.05	166.063	C9H10O3	[M+H]+	Veratraldehyde	Phenolic acids	Phenolic acids	120-14-9
882	268.11	136.06	267.097	C10H13N5O4	[M+H]+	Vidarabine	Nucleotides and derivatives	Nucleotides and derivatives	5536-17-4
883	461.07	167.04	462.08	C21H18O12	[M-H]-	Vnilloylcaffeoyltartaric acid	Phenolic acids	Phenolic acids	-
884	223.13	161.1	224.141	C13H20O3	[M-H]-	Vomifoliol (Blumenol A)	Terpenoids	Monoterpenoids	189351-15-3
885	151.03	108.02	152.033	C5H4N4O2	[M-H]-	Xanthine	Nucleotides and derivatives	Nucleotides and derivatives	69-89-6
886	283.07	151.03	284.076	C10H12N4O6	[M-H]-	Xanthosine	Nucleotides and derivatives	Nucleotides and derivatives	146-80-5
887	136.06	119.04	135.054	C5H5N5	[M+H]+	Zarzissine	Alkaloids	Alkaloids	160568-14-9
888	373.13	343.08	372.121	C20H20O7	[M+H]+	[(1R,2S)-1-(1,3-benzodioxol-5-yl)-2-methyl-3-oxobutyl]4-hydroxy-3-methoxybenzoate	Lignans and Coumarins	Lignans	-
889	179.03	123.04	178.027	C9H6O4	[M+H]+	aesculetine	Lignans and Coumarins	Coumarins	-
890	118.08	72.08	117.079	C5H11NO2	[M+H]+	alanine betaine	Alkaloids	Alkaloids	-
891	295.23	195.14	296.235	C18H32O3	[M-H]-	alpha-Hydroxylinoleic acid*	Lipids	Free fatty acids	57818-44-7
892	205.1	146.06	204.09	C11H12N2O2	[M+H]+	cyclo-(Gly-Phe)	Amino acids and derivatives	Amino acids and derivatives	10125-07-2
893	133.05	69.04	132.042	C5H8O4	[M+H]+	dihydro-4-hydroxy-5-hydroxymethyl-2(3H)-furanone	Others	Others	-
894	227.13	183.14	228.136	C12H20O4	[M-H]-	glycoric acid	Others	Others	-
895	188.07	118.06	187.063	C11H9NO2	[M+H]+	naphthisoxazol A*	Alkaloids	Alkaloids	-
896	221.09	130.06	220.085	C11H12N2O3	[M+H]+	o-Carboxy-5-hydroxytryptamine	Alkaloids	Alkaloids	-
897	147.05	129.03	148.052	C9H8O2	[M-H]-	p-Coumaraldehyde	Phenolic acids	Phenolic acids	2538-87-6
898	165.05	119.05	164.047	C9H8O3	[M+H]+	p-Coumaric acid	Phenolic acids	Phenolic acids	501-98-4
899	179.07	147.04	178.063	C10H10O3	[M+H]+	p-Coumaric acid methyl ester	Phenolic acids	Phenolic acids	19367-38-5
900	325.09	163.04	326.1	C15H18O8	[M-H]-	p-Coumaric acid-4-O-glucoside*	Phenolic acids	Phenolic acids	117405-48-8
901	235.14	147.04	234.137	C13H18N2O2	[M+H]+	p-Coumaroylputrescine	Alkaloids	Phenolamine	34136-53-3
902	149.06	131.05	150.068	C9H10O2	[M-H]-	p-Coumaryl alcohol	Phenolic acids	Phenolic acids	3690-05-9
903	195.06	163.04	194.058	C10H10O4	[M+H]+	pithecellobiumol B	Others	Chromone	-
904	235.17	179.11	234.162	C15H22O2	[M+H]+	polygodial	Terpenoids	Sesquiterpenoids	6754-20-7
905	343.15	163.07	342.147	C20H22O5	[M+H]+	tetrahydrochromone M	Others	Chromone	-
906	175.02	98.98	174.016	C6H6O6	[M+H]+	trans-Aconitic acid	Organic acids	Organic acids	4023-65-8
907	146.06	118.06	145.053	C9H7NO	[M+H]+	Α-hydroxyquinoline	Alkaloids	Alkaloids	-
908	342.14	162.07	341.132	C12H23NO10	[M+H]+	α-D-glucosyl-(1→1')-3'-amino-3'-deoxy-β-D-glucoside	Others	Saccharides	-
909	163.04	119.05	164.047	C9H8O3	[M-H]-	α-Hydroxycinnamic Acid*	Phenolic acids	Phenolic acids	5801-57-0
910	145.01	101.02	146.022	C5H6O5	[M-H]-	α-Ketoglutaric acid	Organic acids	Organic acids	328-50-7
911	277.22	277.22	278.225	C18H30O2	[M-H]-	α-Linolenic Acid	Lipids	Free fatty acids	463-40-1
912	335.06	123.06	334.057	C11H15N2O8P	[M+H]+	β-Nicotinamide mononucleotide	Nucleotides and derivatives	Nucleotides and derivatives	1094-61-7
913	104.07	69.03	103.063	C4H9NO2	[M+H]+	γ-Aminobutyric acid	Organic acids	Organic acids	56-12-2
914	311.12	165.05	310.116	C14H18N2O6	[M+H]+	γ-Glutamyltyrosine	Amino acids and derivatives	Amino acids and derivatives	7432-23-7
