# Supplementary material for: Determination of metabolite differences between loquat nectar and honey by UPLC-MS/MS
Source: PeerJ journal article supplement (doi:10.7717/peerj.19988), 2025-09-16
Supplement: Table_S5.xlsx [file Table_S5.xlsx]

## Sheet: Sheet2
Table S5 Significantly different non-volatile metabolites between DHPHM and DHPFM.
No.	Compounds	VIP	Fold Change	Log2FC	Type
	Amino acids and derivatives
1	(3-(carboxyamino)-2-methylpropanoyl)phenylalanine*	1.10209	0.0347603	-4.84641	down
2	2-Amino-3,4-dihydroxybutanoic acid-3-O-arabinoside	1.07837	16.9652	4.08451	up
3	3-Hydroxy-3-methylpentane-1,5-dioic acid	1.10366	0.0863776	-3.5332	down
4	5-Hydroxy-DL-tryptophan(5-HTP)	1.09985	0.145399	-2.78191	down
5	Abu-Asp-OH	1.09322	0.0462233	-4.43524	down
6	Arginine methyl ester*	1.09372	0.224945	-2.15236	down
7	Asn-Ile	1.09417	0.0916339	-3.44798	down
8	Asn-Leu	1.09798	0.093308	-3.42186	down
9	Cyclo(Pro-Glu)	1.08668	0.217538	-2.20066	down
10	D-Allo-Isoleucine*	1.10394	0.204281	-2.29137	down
11	D-Ornithine	1.09075	0.445678	-1.16593	down
12	D-Proline betaine	1.08915	0.341789	-1.54882	down
13	DL-Leucine*	1.08323	0.215795	-2.21227	down
14	DL-Tryptophan	1.09477	0.136208	-2.87612	down
15	Gamma-Glu-Phe*	1.10028	0.0443221	-4.49583	down
16	Gln-Gly	1.10162	0.231427	-2.11137	down
17	Glycylphenylalanine*	1.10023	0.137256	-2.86506	down
18	Homoarginine	1.03333	0.273597	-1.86987	down
19	Homoproline	1.08859	2.36521	1.24197	up
20	Ile-Asn	1.09349	0.262943	-1.92718	down
21	L-Asparagine	1.03405	0.402954	-1.31131	down
22	L-Aspartic acid	1.09814	0.198906	-2.32984	down
23	L-Citrulline	1.0936	0.121552	-3.04036	down
24	L-Glutamine	1.07176	2.11242	1.0789	up
25	L-Glutamine-O-glycoside	1.09086	16.2917	4.02606	up
26	L-Glycyl-L-isoleucine	1.10071	0.17107	-2.54734	down
27	L-Glycyl-L-phenylalanine*	1.09524	0.173592	-2.52623	down
28	L-Homocystine	1.01978	3.32034	1.73133	up
29	L-Homomethionine	1.09537	0.0961847	-3.37805	down
30	L-Isoleucyl-L-Aspartate	1.10343	0.151823	-2.71954	down
31	L-Leucyl-L-phenylalanine	1.07112	0.136594	-2.87204	down
32	L-Lysine	1.10181	2.43117	1.28165	up
33	L-Methionine Sulfoxide	1.10007	0.19301	-2.37325	down
34	L-Norleucine*	1.10461	0.202073	-2.30705	down
35	L-Ornithine	1.10253	0.172024	-2.53932	down
36	L-Seryl-L-Isoleucine	1.10105	0.0920755	-3.44104	down
37	L-Theanine	1.04889	180.066	7.49238	up
38	L-Tryptophan	1.09615	0.171002	-2.54791	down
39	L-Tyrosine methyl ester	1.04605	0.453981	-1.1393	down
40	L-Valine	1.05267	0.402776	-1.31195	down
41	L-Valyl-L-Leucine	1.09981	0.0901888	-3.47091	down
42	Leu-Asp	1.09971	0.0943186	-3.40631	down
43	Leu-Pro	1.09169	0.202472	-2.30421	down
44	Methyl 3-aminopropanoate	1.07639	0.342061	-1.54768	down
45	N,N'-Dimethylarginine;SDMA*	1.07134	0.295779	-1.75741	down
46	N,N-Dimethylglycine*	1.07465	0.370378	-1.43293	down
47	N-(1-Deoxy-1-fructosyl)Tryptophan	1.04958	0.295898	-1.75683	down
48	N-Acetyl-L-phenylalanine	1.0262	0.271785	-1.87946	down
49	N-Ethylglycine*	1.08059	0.389656	-1.35973	down
50	N-Fructosyl Pyroglutamate	1.08651	34.4732	5.1074	up
51	N-Monomethyl-L-arginine*	1.07898	0.213581	-2.22714	down
52	N-methylphenylalanine	1.04909	2.77583	1.47292	up
53	N-succinyl-proline	1.08138	0.0631868	-3.98423	down
54	NG,NG-Dimethyl-L-arginine*	1.07698	0.268752	-1.89565	down
55	Phe-Ser	1.10094	0.0718375	-3.79912	down
56	S-Adenosylmethionine	1.08265	0.11107	-3.17046	down
57	Trans-4-Hydroxy-L-proline	1.03345	0.356801	-1.48681	down
58	Tyrosylleucine	1.09487	0.0900161	-3.47367	down
59	cyclo-(Gly-Phe)	1.10034	0.13462	-2.89303	down
60	4-Methylhippuric Acid	1.06203	10.3534	3.37203	up
61	Abu-His-OH	1.10568	22.9014	4.51736	up
62	His-Phe	1.10239	8.68763	3.11896	up
63	L-Prolyl-L-Leucine	1.09495	5.93453	2.56913	up
64	L-Tyrosyl-L-serine	1.09159	14.5748	3.8654	up
65	L-α-Glutamyl-L-Glutamic Acid	1.08988	6.61943	2.72671	up
66	N-(1-Deoxy-1-fructosyl)Asparagine	1.10367	13.7292	3.77918	up
67	N-(1-Deoxy-1-fructosyl)Phenylalanine	1.10557	12.7573	3.67325	up
68	N-(1-Deoxy-1-fructosyl)Valine	1.1011	9.24696	3.20898	up
69	Oxiglutatione	1.09933	10.3413	3.37035	up
70	Ser-Gly-Phe	1.10474	9.36811	3.22776	up
71	DL-Methionine	1.09105	0.114677	-3.12435	down
72	Ile-Phe	1.06174	0.0323047	-4.95211	down
73	L-Alanyl-L-Phenylalanine	1.04701	0.050903	-4.2961	down
74	L-Aspartyl-L-Phenylalanine	1.0579	0.0508246	-4.29833	down
75	L-Carnosine	1.08626	0.127449	-2.97201	down
76	L-Glutaminyl-L-isoleucine	1.10525	0.121554	-3.04033	down
77	L-Methionine	1.09029	0.115164	-3.11824	down
78	L-Valyl-L-Phenylalanine	1.0713	0.0201902	-5.6302	down
79	L-γ-Glutamyl-L-leucine	1.08757	0.0870768	-3.52157	down
80	Met-Met	1.10529	0.0987909	-3.33948	down
81	N-carboxy-N-(2-oxo-2-phenylethyl)-L-alanine	1.09281	0.0733501	-3.76906	down
82	S-(5'-Adenosy)-L-homocysteine	1.09788	0.0613296	-4.02727	down
83	S-(Methyl)glutathione	1.10099	0.0682854	-3.87228	down
84	Thr-Trp	1.10047	0.0619491	-4.01277	down
85	γ-Glutamyltyrosine	1.10194	0.0799446	-3.64485	down
	Alkaloids
86	1,3-dihydroxy-2,3,3a,4-tetrahydropyrrolo[2,1-b]quinazolin-9(1H)-one	1.09757	0.14488	-2.78707	down
87	2-Amino-4,5-dihydro-1H-imidazole-4-acetic acid	1.09933	0.358389	-1.4804	down
88	2-Ethyl-3-methylmaleimide-N-glucoside	1.10273	0.325062	-1.62121	down
89	2-Phenylethylamine	1.10457	11.4057	3.51168	up
90	3,5-Dihydro-2H-Furo[3,2-C]Quinolin-4-One*	1.09926	0.124778	-3.00257	down
91	3-Carbamyl-1-methylpyridinium;(1-Methylnicotinamide)	1.04252	2.72287	1.44513	up
92	3-Indoleacetonitrile	1.10262	0.169974	-2.55661	down
93	3-amino-2-naphthoic acid*	1.08949	0.139327	-2.84345	down
94	3-pyridine-methanol-O-β-D-glucopyranosyl*	1.09702	0.366337	-1.44876	down
95	3-quinolinecarboxylic acid	1.09911	74.7082	6.2232	up
96	4,5,6-Trihydroxy-2-cyclohexen-1-ylideneacetonitrile	1.10509	4.77732	2.2562	up
97	5-Aminolevulinic Acid	1.10545	0.185923	-2.42722	down
98	6-Deoxyfagomine	1.09409	0.172138	-2.53836	down
99	9-[(2S,3S,4S,5R)-3,4-dihydroxy-5-(hydroxymethyl)oxolan-2-yl]-1H-purin-6-one	1.10277	12.3908	3.6312	up
100	Benzamide	1.09458	10.833	3.43736	up
101	DL-2-Aminoadipic acid	1.0894	0.257222	-1.95891	down
102	Di-p-coumaroylcaffeoyl Spermidine	1.08215	4.13711	2.04862	up
103	Diferuloyl-p-coumaroyl Spermidine	1.01144	4.16463	2.05819	up
104	Histidinol	1.09951	0.333796	-1.58296	down
105	Indole-3-carboxylic acid*	1.09345	0.0953446	-3.39071	down
106	Indole-5-carboxylic acid*	1.1056	0.0629125	-3.99051	down
107	L-Azetidine-2-carboxylic acid	1.08287	0.318281	-1.65163	down
108	Lumichrome	1.09439	50.9239	5.67027	up
109	N-(2-Hydroxy-4-methoxyphenyl)acetamide	1.05553	0.458419	-1.12526	down
110	N-(3-hydroxy-4-methoxyphenethyl)-4-hydroxybutanamide	1.08641	17.4177	4.12248	up
111	N-Acetylcadaverine	1.08502	0.457032	-1.12963	down
112	N-Acetylisatin	1.10244	126.81	6.98653	up
113	N-Benzylmethylene isomethylamine	1.10474	4.56768	2.19146	up
114	N1,N10-Bis(p-coumaroyl)spermidine	1.0673	0.215577	-2.21372	down
115	Nicotianamine	1.09504	0.473452	-1.07871	down
116	Nicotinic Acid Methyl Ester(Methyl Nicotinate)	1.09479	0.0184696	-5.7587	down
117	Piperidine	1.1041	0.15595	-2.68084	down
118	Pyran[3,4-b]indole-2-ketone	1.10437	0.132052	-2.92083	down
119	Spermine	1.0186	0.354501	-1.49614	down
120	Trigonelline	1.07633	2.98378	1.57714	up
121	Vanillylamine	1.06079	0.197286	-2.34164	down
122	alanine betaine	1.06265	0.44755	-1.15988	down
123	naphthisoxazol A*	1.0993	0.132667	-2.91412	down
124	o-Carboxy-5-hydroxytryptamine	1.04535	0.190719	-2.39048	down
125	3α-Dihydrocadambine	1.06697	9.26047	3.21108	up
126	Caffeine	1.08031	8.71899	3.12416	up
127	Hexadecyl ethanolamine	1.07088	9.32123	3.22052	up
128	L-Tyramine	1.10143	5.8102	2.53859	up
129	N-benzoyl-2-aminoethyl-β-D-glucopyranoside	1.10557	8.77972	3.13418	up
130	10-Formyltetrahydrofolic Acid	1.10505	0.0630676	-3.98696	down
131	2-oxindole-3-acetic acid	1.10579	0.0734891	-3.76632	down
132	8-hydroxyquinoline	1.0237	0.0966751	-3.37071	down
133	Cyclohexylamine	1.10574	0.115247	-3.1172	down
134	Methoxyindoleacetic acid	1.10508	0.0927085	-3.43116	down
135	N(2)-methylharmine	1.10312	0.0744451	-3.74768	down
136	N-(4-Aminobutyl)benzamide	1.10529	0.102631	-3.28445	down
137	Octahydroisoindole	1.09645	0.0903265	-3.46871	down
138	Prunasin	1.08606	0.0814908	-3.61722	down
139	Rubusine	1.10447	0.0770216	-3.69859	down
140	Sambunigrin	1.08332	0.0831607	-3.58795	down
141	Spiramine I	1.10284	0.0918273	-3.44493	down
142	Spiramine N	1.06978	0.116129	-3.1062	down
143	Α-hydroxyquinoline	1.10401	0.103279	-3.27538	down
	Flavonoids
144	2',3',4',5,7-Pentahydroxyflavone*	1.08108	8.98139	3.16694	up
145	2,6,7,4'-Tetrahydroxyisoflavanone	1.07391	0.0175677	-5.83093	down
146	3'-O-Methyltricetin-5-O-glucoside*	1.10295	0.00941981	-6.73009	down
147	3'-O-Methyltricetin-7-O-glucoside*	1.09913	0.0104195	-6.58457	down
148	3'-methoxyquercetin-3-O-L-rhamnosyl(1→2)-glucopyranoside*	1.10308	0.0631568	-3.98492	down
149	3,3',5,7-Tetrahydroxy-4',6-Dimethoxyflavone-7-O-Gentiobioside; (Laciniatin-7-O-Gentiobioside)	1.09874	0.00600072	-7.38065	down
150	3,4,2',4',6'-Pentahydroxychalcone-4'-O-glucoside	1.10027	0.0243086	-5.36239	down
151	3,5,6,7,8,3',4'-Heptamethoxyflavone	1.09109	0.129011	-2.95444	down
152	5,6,3',4'-Tetrahydroxy-3,7-dimethoxyflavone-6-O-glucoside*	1.06331	0.0384338	-4.70148	down
153	5,7,3',4',5'-Pentahydroxydihydroflavone	1.103	0.0916272	-3.44808	down
154	5,7,3',4',5'-Pentahydroxyflavan (Tricetiflavan)	1.07858	0.154211	-2.69703	down
155	6-C-Methylquercetin-3-O-glucoside*	1.09156	0.0120181	-6.37865	down
156	6-C-Methylquercetin-3-O-rutinoside*	1.09891	0.0529297	-4.23978	down
157	6-Hydroxyluteolin 5-glucoside*	1.06853	0.406444	-1.29887	down
158	6-Methoxykaempferol-3-O-glucoside*	1.08899	0.0317876	-4.97539	down
159	Aromadendrin-7-O-glucoside	1.06506	0.0317544	-4.9769	down
160	Aureusidin-4-O-glucoside*	1.06113	0.333228	-1.58542	down
161	Cinchonain Ia*	1.09498	3.16671	1.66298	up
162	Cinchonain Ib*	1.07976	3.57404	1.83756	up
163	Cirsimaritin-8-C-glucoside	1.07862	0.129763	-2.94605	down
164	Cyanidin-3-O-(6''-O-caffeoyl)glucoside	1.03146	0.0278022	-5.16865	down
165	Cyanidin-3-O-glucoside*	1.09916	0.134676	-2.89244	down
166	Delphinidin-3-O-(6''-O-p-coumaroyl)glucoside	1.04739	0.270643	-1.88553	down
167	Hesperetin-3'-O-glucoside	1.074	0.198472	-2.33299	down
168	Isohemiphloin	1.09807	0.0568288	-4.13723	down
169	Isorhamnetin-3-O-Glucoside*	1.04437	0.0709901	-3.81624	down
170	Isorhamnetin-3-O-glucoside-7-O-rhamnoside	1.10503	0.036504	-4.7758	down
171	Isorhamnetin-3-O-neohesperidoside*	1.06874	0.0476691	-4.3908	down
172	Isorhamnetin-3-O-rutinoside*	1.09985	0.0447428	-4.4822	down
173	Kaempferol-3-O-glucoside (Astragalin)*	1.03202	0.373429	-1.42109	down
174	Kaempferol-3-O-glucoside-7-O-rhamnoside*	1.02839	0.382958	-1.38474	down
175	Kaempferol-3-O-mannoside（Amoenin）	1.06228	0.20818	-2.26409	down
176	Kaempferol-3-O-robinobioside(Biorobin)*	1.09884	0.207605	-2.26809	down
177	Kaempferol-4'-O-glucoside*	1.04227	0.43081	-1.21488	down
178	Limocitrin 3-Glucoside*	1.06517	0.0323858	-4.94849	down
179	Limocitrin malonyl glucoside	1.10251	0.0348895	-4.84106	down
180	Limocitrin-3-O-galactoside*	1.10506	0.00494232	-7.6606	down
181	Limocitrin-3-O-glucoside	1.0996	0.00672788	-7.21563	down
182	Limocitrin-7-O-glucoside*	1.05478	0.0341941	-4.87011	down
183	Limocitrin-7-O-rutinoside*	1.00781	0.032529	-4.94213	down
184	Luteolin-7-O-glucoside (Cynaroside)*	1.02741	0.145219	-2.78369	down
185	Luteolin-7-O-neohesperidoside (Lonicerin)*	1.05233	0.263474	-1.92427	down
186	Luteolin-7-O-rutinoside*	1.01125	0.287095	-1.8004	down
187	Morin*	1.07645	6.14129	2.61854	up
188	Nepetin-7-O-alloside*	1.08088	0.0842168	-3.56975	down
189	Okanin-4'-(6''-O-acetyl)glucoside*	1.0987	0.00984122	-6.66695	down
190	Patuletin-3-O-gentiobioside	1.08655	0.0058836	-7.40908	down
191	Patuletin-3-O-glucoside	1.04146	0.223082	-2.16436	down
192	Patuletin-3-O-rutinoside	1.08124	0.0113541	-6.46064	down
193	Pedaliin*	1.10526	0.011363	-6.45951	down
194	Petunidin-3-O-(6''-O-caffeoyl)glucoside	1.10301	0.0103894	-6.58874	down
195	Petunidin-3-O-(6''-O-p-Coumaroyl)glucoside	1.08976	0.05286	-4.24168	down
196	Quercetin	1.04814	0.421518	-1.24633	down
197	Quercetin-3-O-(4''-O-glucosyl)rhamnoside*	1.01717	0.338064	-1.56463	down
198	Quercetin-3-O-glucoside (Isoquercitrin)*	1.09108	0.26969	-1.89063	down
199	Quercetin-3-O-neohesperidoside	1.02856	0.20868	-2.26064	down
200	Quercetin-3-O-robinobioside	1.01024	0.367907	-1.44259	down
201	Quercetin-3-O-rutinoside (Rutin)*	1.04923	0.272249	-1.877	down
202	Quercetin-3-O-sophoroside (Baimaside)	1.08234	0.0167486	-5.89982	down
203	Quercetin-5-O-β-D-glucoside*	1.03839	0.295752	-1.75754	down
204	Quercetin-7-O-rutinoside*	1.06454	0.142545	-2.81051	down
205	Rutin Trihydrate	1.02733	0.203085	-2.29984	down
206	Selagin	1.10226	0.0161806	-5.94959	down
207	Sexangularetin-3-O-glucoside-7-O-rhamnoside*	1.09631	0.0344018	-4.86137	down
208	Syringetin-3-O-glucoside*	1.04821	0.046071	-4.44	down
209	Syringetin-7-O-glucoside*	1.10332	0.00596344	-7.38964	down
210	Tamarixetin-3-O-glucoside (Tamarixin)	1.10141	0.0132688	-6.23582	down
211	Tamarixetin-3-O-glucoside-7-O-rhamnoside*	1.09125	0.0455084	-4.45772	down
212	Tricin-7-O-saccharic acid	1.06602	0.049792	-4.32794	down
213	3-O-Acetylpinobanksin	1.1053	10.1118	3.33797	up
214	Didymin (Isosakuranetin-7-O-rutinoside)*	1.09864	18.5151	4.21063	up
215	Kaempferol-3-O-(6''-p-Coumaroyl)glucoside (Tiliroside)	1.10246	13.9304	3.80016	up
216	Methylhesperidin	1.10405	11.725	3.55151	up
217	Naringenin (5,7,4'-Trihydroxyflavanone)	1.10562	9.37814	3.2293	up
218	Pinocembrin (Dihydrochrysin)	1.10575	11.6572	3.54315	up
219	Poncirin (Isosakuranetin-7-O-neohesperidoside)*	1.09493	16.3898	4.03472	up
220	1,3,6,7-Tetrahydroxyxanthone	1.10262	0.0850757	-3.55511	down
221	2,4,2',4'-tetrahydroxy-3'-prenylchalcone	1.1017	0.089556	-3.48107	down
222	3',5',5,7-Tetrahydroxy-4'-methoxyflavanone-3'-O-glucoside	1.08181	0.0459784	-4.4429	down
223	5,6,3',4'-Tetrahydroxy-3,7-dimethoxyflavone	1.02619	0.0596928	-4.0663	down
224	5,7,3',4'-Tetrahydroxy-6-methoxyflavone-8-C-[glucosyl-(1-2)]-glucoside	1.10151	0.0389801	-4.68112	down
225	6-Hydroxykaempferol-3,6-O-Diglucoside	1.09619	0.0329231	-4.92475	down
226	6-Hydroxykaempferol-7-O-glucoside	1.09546	0.0456514	-4.4532	down
227	7,3',4'-Trihydroxyquercetin glucoside	1.1002	0.100699	-3.31189	down
228	7-O-Methylaloesin	1.07408	0.122851	-3.02502	down
229	Azaleatin (5-O-Methylquercetin)	1.09411	0.0450115	-4.47356	down
230	Butin-7-O-glucoside	1.05112	0.0458645	-4.44648	down
231	Cyanidin-3-O-galactoside*	1.10571	0.0531267	-4.23442	down
232	Fustin	1.09089	0.0889395	-3.49103	down
233	Gossypetin-3-O-(6''-malonyl)glucoside*	1.0776	0.00856464	-6.86739	down
234	Gossypetin-3-O-glucoside*	1.07692	0.0526798	-4.24661	down
235	Gossypetin-7-O-rhamnoside; Rhodiolgin	1.02716	0.0744862	-3.74688	down
236	Isorhamnetin-3-O-(6''-malonyl)glucoside-7-O-rhamnoside	1.07471	0.089416	-3.48332	down
237	Isorhamnetin-3-O-rutinoside-7-O-rhamnoside	1.08257	0.0999438	-3.32274	down
238	Kaempferol-3-O-sambubioside	1.07883	0.0784545	-3.672	down
239	Kaempferol-3-O-xylosyl(1→2)glucoside	1.08152	0.0815129	-3.61683	down
240	Luteolin-7,3'-di-O-glucoside	1.05874	0.0394044	-4.6655	down
241	Luteolin-7-O-gentiobioside	1.10163	0.0510151	-4.29293	down
242	Myricetin-3-O-(6''-malony)glucoside*	1.07331	0.0944473	-3.40435	down
243	Myricetin-3-O-galactoside*	1.09984	0.0760493	-3.71692	down
244	Myricetin-3-O-β-D-glucoside*	1.10452	0.0889473	-3.49091	down
245	Quercetagetin-7-O-glucoside(Quercetagitrin)*	1.04977	0.0497166	-4.33013	down
246	Quercetin 3-O-glucoside 7-O-xyloside	1.08622	0.0266399	-5.23027	down
247	Quercetin-3-O-(6''-O-arabinosyl)glucoside	1.08618	0.0384205	-4.70198	down
248	Sakuranin	1.10521	0.0809711	-3.62645	down
	Lignans and Coumarins
249	2-((4,5-dihydroxy-2-(4-(3-(hydroxymethyl)-5-(2-hydroxyvinyl)-7-methoxy-2,3-dihydrobenzofuran-2-yl)-2-methoxyphenoxy)tetrahydro-2H-pyran-3-yl)oxy)tetrahydro-2H-pyran-3,4,5-triol	1.09119	0.0512081	-4.28748	down
250	3,4-Dihydrocoumarin	1.07657	2.4353	1.2841	up
251	4-Hydroxycoumarin di-glucoside	1.08792	0.260854	-1.93868	down
252	5,7-Dihydroxy-4-methylcoumarin	1.07592	0.230826	-2.11512	down
253	7-hydroxy-2H-1-benzopyran-2-one	1.10255	0.0162188	-5.94619	down
254	Dehydrodiconiferyl alcohol	1.08507	0.120034	-3.05849	down
255	Erythro-Guaiacylglycerol-β-Coniferyl Ether	1.07333	0.1612	-2.63308	down
256	Erythro-Guaiacylglycerol-β-Sinapyl Ether	1.08872	0.234822	-2.09036	down
257	Isoscopoletin-β-D-glucoside	1.09991	0.0128825	-6.27844	down
258	Murrayacarpin A glucoside	1.09911	0.0132972	-6.23273	down
259	Scopoletin (7-Hydroxy-6-methoxycoumarin)	1.00118	0.324809	-1.62234	down
260	aesculetine	1.09696	0.0492194	-4.34463	down
261	Divanillyltetrahydrofuran	1.10521	11.1891	3.48403	up
262	Nodakenin	1.06745	40.7763	5.34966	up
263	Secoisolariciresinol	1.10217	17.495	4.12887	up
264	Secoisolariciresinol 4-O-glucoside	1.10517	10.9898	3.45809	up
265	(7S,8R-Threo-3',4,9'-trihydroxy-3-methoxy-4',7-epoxy-neolignan-9-O-rhamnoside	1.09799	0.0667314	-3.90549	down
266	6,7-Dihydroxy-4-methylcoumarin	1.06634	0.125325	-2.99625	down
267	6-Hydroxy-4-(4-hydroxy-3-methoxyphenyl)-7-methoxy-naphtho[2,3-c]furan-1,3-dione-1	1.10171	0.0883484	-3.50065	down
268	Agrimonolide	1.1034	0.061886	-4.01424	down
269	Coumarin	1.10544	0.105653	-3.24259	down
270	Dihydrodehydrodiconiferyl alcohol	1.09381	0.0732571	-3.77089	down
271	Esculetin-7-O-quinic acid	1.09787	0.0803037	-3.63839	down
272	Hydroxydaphnoretin glucoside	1.05614	0.0412163	-4.60064	down
273	Isofraxidin-7-O-glucoside	1.10371	0.0767025	-3.70458	down
274	Pinoresinol-4,4'-O-diglucoside	1.09053	0.103887	-3.26691	down
275	Pinoresinol-4-O-glucoside	1.10275	0.0915134	-3.44987	down
276	Scoparone	1.10452	0.0863504	-3.53365	down
277	Scopoletin-7-O-glucoside (Scopolin)	1.07077	0.144544	-2.79042	down
278	Syringic acid 4-O-rhamnoside	1.1021	0.0886722	-3.49537	down
	Lipids
279	1'-(3-methylisobutyryl)sucrose	1.10129	0.219286	-2.18911	down
280	1-Monolinolenoyl-Rac-Glycerol*	1.0101	4.35198	2.12167	up
281	1-Monomyristin	1.10152	9.70498	3.27872	up
282	14-Amino-15-hydroxy-11-methylpentadecanoic acid	1.01988	0.453718	-1.14013	down
283	2-Aminotetradecane-1,11,13-triol	1.012	0.333307	-1.58508	down
284	2-Aminotetradecane-1,5,13-triol	1.02861	0.349986	-1.51463	down
285	2-Hydroxy-4-methyl-3-undecanoyloxypentanoic acid methyl ester*	1.10198	0.109412	-3.19215	down
286	5,8,11-Eicosatriynoic Acid	1.10427	13.2951	3.73283	up
287	6,9,10-Trihydroxyoctadec-7-enoic acid; Sanleng acid*	1.09996	0.106661	-3.22889	down
288	9,10,13-Trihydroxy-11-Octadecenoic Acid	1.10297	0.0556311	-4.16797	down
289	9,16-Dihydroxypalmitic acid	1.10189	0.0374969	-4.73708	down
290	9-Hydroxy-12-oxo-15(Z)-octadecenoic acid*	1.09695	14.7383	3.88149	up
291	Hydroperoxylinoleic acid*	1.08875	15.2506	3.9308	up
292	LysoPC 16:0(2n isomer)	1.01075	5.44279	2.44435	up
293	Octadecanedioic acid	1.09918	0.104273	-3.26156	down
294	Undecanedioic acid	1.07665	2.06274	1.04456	up
295	α-Linolenic Acid	1.10378	10.3363	3.36965	up
296	1-(2,3-dihydroxypropoxy)-3-(((2-(dimethylamino)ethoxy)(hydroxy)phosphoryl)oxy)propan-2-yl (11Z,14Z)-octadeca-11,14-dienoate	1.10468	36.9562	5.20774	up
297	1-(2,3-dihydroxypropoxy)-3-(((2-(dimethylamino)ethoxy)(hydroxy)phosphoryl)oxy)propan-2-yl (8E,11Z,14Z)-octadeca-8,11,14-trienoate	1.10451	34.2572	5.09833	up
298	1-(2,3-dihydroxypropoxy)-3-(((2-(dimethylamino)ethoxy)(hydroxy)phosphoryl)oxy)propan-2-yl palmitate*	1.10418	10.7421	3.4252	up
299	1-(9Z,12Z-octadecadienoyl)-sn-glycero-3-phosphocholine	1.10576	7.89071	2.98015	up
300	10-Hydroxy-2-Decenoic Acid	1.10566	9.02872	3.17452	up
301	10-Hydroxydecanoic acid	1.10529	11.2473	3.49151	up
302	13-KODE; (9Z,11E)-13-Oxooctadeca-9,11-dienoic acid	1.1034	10.1635	3.34533	up
303	2-(2,3-dihydroxypropoxy)-3-(((2-(dimethylamino)ethoxy)(hydroxy)phosphoryl)oxy)propyl (11Z,14Z)-octadeca-11,14-dienoate	1.10533	5.21752	2.38336	up
304	2-(2,3-dihydroxypropoxy)-3-(((2-(dimethylamino)ethoxy)(hydroxy)phosphoryl)oxy)propyl (8E,11Z,14Z)-octadeca-8,11,14-trienoate	1.10316	11.5437	3.52904	up
305	2-(2,3-dihydroxypropoxy)-3-(((2-(dimethylamino)ethoxy)(hydroxy)phosphoryl)oxy)propyl palmitate*	1.1039	10.5854	3.404	up
306	2-Palmitoylglycerol*	1.09944	9.40514	3.23345	up
307	2-aminotetracoSane-1,5,23-triol	1.05226	12.207	3.60964	up
308	LysoPC 18:1	1.06819	10.9349	3.45087	up
309	LysoPC 18:1(2n isomer)	1.06733	11.4873	3.52197	up
310	LysoPC 18:3(2n isomer)	1.09096	605.15	9.24115	up
311	LysoPC(18:3(9Z,12Z,15Z))	1.10282	17.2872	4.11163	up
312	LysoPE 16:0	1.10207	10.0148	3.32407	up
313	LysoPE 16:0(2n isomer)	1.10305	10.0408	3.32781	up
314	LysoPE 18:2	1.10576	11.8092	3.56183	up
315	LysoPE 18:2(2n isomer)	1.1046	12.5134	3.64541	up
316	LysoPE 18:3	1.10314	12.4892	3.64261	up
317	LysoPE 18:3(2n isomer)	1.1017	11.531	3.52745	up
318	Monopalmitin*	1.08608	8.31456	3.05564	up
319	10,16-Dihydroxypalmitic acid	1.10303	0.0647598	-3.94876	down
320	12(13)Ep-9-KODE	1.08956	0.0657398	-3.92709	down
321	9,10,18-Trihydroxystearic acid	1.0989	0.113368	-3.14092	down
	Nucleotides and derivatives
322	2'-Deoxyguanosine	1.07827	0.155596	-2.68412	down
323	2'-O-Methyladenosine	1.09806	0.197744	-2.3383	down
324	4-methyl-1,5,2,3-dioxadiazinan-2-amine	1.10362	4.35953	2.12417	up
325	5'-Deoxy-5'-(methylthio)adenosine	1.05115	0.24618	-2.02222	down
326	8-Azaguanine	1.0998	0.215011	-2.21752	down
327	9-Alpha-Ribofuranosyladenine*	1.07398	16.8607	4.0756	up
328	9-Arabinosyladenine*	1.07416	17.4889	4.12837	up
329	Adenosine 5'-monophosphate	1.08443	17.494	4.12879	up
330	Adenosine*	1.08375	17.5146	4.13049	up
331	Crotonoside; 2-Hydroxyadenosine	1.09495	7.89456	2.98086	up
332	Cytarabine	1.02442	0.311568	-1.68238	down
333	Cytidine	1.03028	2.6548	1.4086	up
334	Cytosine	1.06686	2.12189	1.08535	up
335	Inosine 5'-monophosphate	1.08982	16.8187	4.072	up
336	Isoguanine	1.00954	2.76699	1.46832	up
337	Nicotinate adenine dinucleotide phosphate	1.10149	0.0842138	-3.5698	down
338	Ribosyladenosine	1.07418	0.116337	-3.10362	down
339	Succinyladenosine	1.10077	0.0643988	-3.95682	down
340	Thymidine	1.05734	0.31634	-1.66045	down
341	Thymine	1.08837	0.272343	-1.8765	down
342	Vidarabine	1.08056	16.9165	4.08036	up
343	2'-Deoxyadenosine-5'-monophosphate	1.10333	8.64509	3.11188	up
344	9-(Arabinosyl)hypoxanthine	1.1013	13.7953	3.78611	up
345	Guanosine 5'-monophosphate	1.10441	22.0029	4.45962	up
346	Inosine	1.10459	34.1231	5.09268	up
347	Toyocamycin	1.09687	24.1495	4.59392	up
348	1-Methyladenine	1.10417	0.118149	-3.08133	down
349	2-Deoxyribose-1-phosphate*	1.09726	0.105389	-3.2462	down
350	2-Deoxyribose-5'-phosphate*	1.01196	0.0421788	-4.56734	down
351	Flavin Single Nucleotide(FMN)	1.10553	0.087183	-3.51981	down
352	N-(p-hydroxybenzyl) adenosine	1.10144	0.0408767	-4.61258	down
	Organic acids
353	1-Aminocyclopropane-1-carboxylic acid	1.06907	0.383908	-1.38117	down
354	2-Acetyl-2-Hydroxybutanoic Acid	1.08186	7.71989	2.94858	up
355	2-Aminoisobutyric acid	1.08205	0.35053	-1.51239	down
356	2-Hydroxy-4-methylpentanoic acid	1.10447	0.0994855	-3.32937	down
357	2-Hydroxyisocaproic acid	1.10175	0.175237	-2.51262	down
358	2-Isopropylmalic Acid	1.09986	0.0487791	-4.35759	down
359	2-Methylglutaric acid*	1.09632	7.05454	2.81855	up
360	2-Picolinic acid	1.09446	0.0957418	-3.38471	down
361	2-Propylmalic Acid*	1.09807	0.0591273	-4.08003	down
362	3-Hydroxyglutaric acid	1.05418	0.279635	-1.83838	down
363	3-Isopropylmalic Acid*	1.10505	0.0414215	-4.59348	down
364	4-Guanidinobutyric acid	1.10157	4.87338	2.28492	up
365	6-Aminocaproic acid	1.10265	0.184443	-2.43875	down
366	6-Hydroxyhexanoic acid	1.05285	0.400033	-1.32181	down
367	Adipic Acid*	1.10089	10.0327	3.32664	up
368	Azelaic acid	1.10152	0.439343	-1.18658	down
369	Citraconic acid	1.06361	0.408841	-1.29039	down
370	Citric Acid	1.07789	0.103009	-3.27915	down
371	Citric acid-1-O-diglucoside	1.06677	3.83579	1.93952	up
372	Fumaric acid	1.09861	0.262882	-1.92751	down
373	Glucosyl 2-Hydroxy-4-Methylpentanoic Acid	1.10078	0.0375401	-4.73542	down
374	Glutaric acid*	1.10353	0.318726	-1.64961	down
375	Isocitric Acid	1.03451	0.108377	-3.20586	down
376	Quinic Acid	1.05462	0.147664	-2.75961	down
377	Suberic Acid	1.07611	2.97517	1.57297	up
378	Tianshic acid	1.10224	0.051741	-4.27255	down
379	Tropic acid	1.07127	2.27556	1.18622	up
380	trans-Aconitic acid	1.10431	0.45952	-1.1218	down
381	γ-Aminobutyric acid	1.09795	0.278489	-1.84431	down
382	3-Hydroxydecanedioic acid	1.10478	8.24034	3.0427	up
383	Citric acid glucoside	1.10074	24.348	4.60573	up
384	Dihydroabscisic Acid 4'-O-glucoside	1.10414	15.6245	3.96574	up
385	Isocitric acid-1-O-diglucoside	1.09682	14.8448	3.89189	up
386	Mandelic acid	1.09759	8.52209	3.09121	up
387	Oxalic acid	1.10525	11.4728	3.52014	up
388	Sebacic acid	1.10569	10.5793	3.40317	up
389	2-Hydroxy-2-methyl-3-oxobutanoic acid*	1.01698	0.106673	-3.22874	down
390	3-Benzoyl-ShikimicAcid	1.10505	0.0276532	-5.17641	down
391	3-Dehydroshikimic acid	1.06326	0.0960395	-3.38023	down
392	3-Ureidopropionic Acid	1.08409	0.074809	-3.74065	down
393	Mandelic acid-β-glucoside	1.07015	0.084146	-3.57096	down
394	Tuberonic acid glucoside	1.09606	0.121381	-3.04239	down
395	α-Ketoglutaric acid	1.10428	0.114219	-3.13013	down
	Phenolic acids
396	1-Caffeoylquinic acid	1.1028	0.0288941	-5.11308	down
397	1-O-p-Coumaroyl-β-D-glucose*	1.10286	0.0212145	-5.55881	down
398	1-O-p-Coumaroylquinic acid*	1.10302	0.0276706	-5.1755	down
399	2,3-Dihydroxybenzoic Acid*	1.05481	0.287878	-1.79647	down
400	2,5-Dihydroxybenzoic acid; Gentisic Acid*	1.06526	0.335363	-1.5762	down
401	2-(Formylamino)benzoic acid	1.07917	0.315801	-1.66291	down
402	2-Hydroxy-3-(4-Hydroxyphenyl)Propanoic Acid*	1.03093	2.86529	1.51868	up
403	2-Hydroxycinnamic acid*	1.05298	0.0763593	-3.71105	down
404	3,4-Dihydroxybenzoic acid (Protocatechuic acid)*	1.07495	0.262204	-1.93124	down
405	3-(Hydroxycinnamoyl)-quinic acid*	1.10538	0.0161574	-5.95166	down
406	3-Hydroxy-4-isopropylbenzylalcohol-3-O-glucoside	1.09609	0.0187553	-5.73656	down
407	3-Hydroxy-4-methoxybenzoic acid; Isovanillic Acid	1.05297	0.0968714	-3.36778	down
408	3-Methoxybenzoic acid	1.10254	0.0718451	-3.79897	down
409	4-Hydroxybenzoic acid	1.10293	0.239844	-2.05983	down
410	4-Hydroxyphenyllactic Acid*	1.09563	2.67938	1.4219	up
411	4-Methylbenzoic acid	1.08244	0.10263	-3.28447	down
412	4-O-Glucosyl-4-hydroxybenzoic acid	1.06766	0.292778	-1.77212	down
413	5-(2-Hydroxyethyl)-2-O-glucosylphenol*	1.10371	0.080057	-3.64283	down
414	5-O-p-Coumaroylquinic acid	1.10215	0.0162696	-5.94167	down
415	6'-O-Feruloyl-D-sucrose*	1.09907	0.0164381	-5.92681	down
416	Androsin	1.1043	0.0193192	-5.69382	down
417	Anisic acid; 4-Methoxybenzoic acid	1.10455	0.108524	-3.20392	down
418	Benzoic acid	1.09435	0.105112	-3.25	down
419	Benzyl-(2''-O-xylosyl)glucoside*	1.06431	0.174386	-2.51965	down
420	Caffeyl alcohol 4-O-β-D-glucopyranoside	1.10499	0.0155375	-6.0081	down
421	Chlorogenic acid (3-O-Caffeoylquinic acid)*	1.1031	0.0264377	-5.24126	down
422	Chlorogenic acid methyl ester	1.10387	0.0102171	-6.61287	down
423	Cimidahurinine*	1.10176	0.09108	-3.45672	down
424	Cinnamic acid	1.08149	0.102348	-3.28844	down
425	Cryptochlorogenic acid (4-O-Caffeoylquinic acid)*	1.09978	0.0223003	-5.48679	down
426	Dihydroferulic Acid	1.01947	2.57384	1.36392	up
427	Dihydroferulic acid glucoside	1.08896	0.0906083	-3.46421	down
428	Ethylparaben	1.0999	0.0645424	-3.95361	down
429	Ferulic acid*	1.10126	0.0472019	-4.40501	down
430	Ferulic acid-4-O-glucoside	1.09617	0.0262335	-5.25245	down
431	Ferulic β-glucoside	1.0996	0.0143145	-6.12638	down
432	Feruloyl syringic acid	1.09717	0.0132368	-6.23931	down
433	Grevilloside G*	1.10089	0.110954	-3.17197	down
434	Isoferulic Acid*	1.09739	0.0483307	-4.37092	down
435	Methyl 4-hydroxybenzoate	1.05774	0.41626	-1.26444	down
436	Methyl anisate	1.10494	0.00226382	-8.78703	down
437	Methylsalicylate-2-O-glucoside	1.09391	0.246626	-2.0196	down
438	Neochlorogenic acid (5-O-Caffeoylquinic acid)*	1.1041	0.0233213	-5.42221	down
439	Salicylic acid-2-O-glucoside	1.10516	0.0431568	-4.53427	down
440	Syringin	1.10278	0.0231631	-5.43203	down
441	Tyrosol; 4-Hydroxyphenylethanol	1.09573	0.257497	-1.95737	down
442	Vanillic acid	1.09935	0.0762526	-3.71307	down
443	Vanillic acid methyl ester	1.09782	0.0283089	-5.1426	down
444	Vanillin acetate	1.02639	0.124438	-3.0065	down
445	p-Coumaraldehyde	1.07453	2.08646	1.06106	up
446	p-Coumaric acid-4-O-glucoside*	1.10037	0.0336975	-4.89121	down
447	p-Coumaryl alcohol	1.09995	0.0559152	-4.16062	down
448	α-Hydroxycinnamic Acid*	1.01753	0.164338	-2.60526	down
449	2-Phenylethanol	1.1046	8.28771	3.05097	up
450	Bengenin	1.05966	29.1858	4.86719	up
451	Cornoside	1.06991	9.42286	3.23617	up
452	Demethyl coniferin	1.10325	11.453	3.51766	up
453	1,3-O-Dicaffeoylquinic Acid (Cynarin)	1.04506	0.0736402	-3.76336	down
454	1-O-Sinapoyl-β-D-glucose	1.10288	0.0731948	-3.77212	down
455	1-O-Vanilloyl-D-Glucose	1.10464	0.0902199	-3.47041	down
456	1-O-rhamnose-3-O-Caffeoyl Quinic Acid	1.08779	0.0449148	-4.47666	down
457	2,5-Dihydroxybenzoic acid-5-O-glucoside	1.09475	0.0903557	-3.46824	down
458	2,6-Dimethoxybenzoic acid	1.09151	0.0716075	-3.80375	down
459	2-Amino-3-methoxybenzoic acid	1.09765	0.103157	-3.27709	down
460	2-Feruloyl-sn-glycerol	1.0991	0.0605873	-4.04484	down
461	2-O-(1'-O-glucosylCaffeoyl)hydroxycitric Acid	1.09974	0.0542446	-4.20438	down
462	2-O-P-Coumaroylhydroxycitric Acid	1.10386	0.0730585	-3.7748	down
463	2-β-D-Glucopyranosyloxy-5-hydroxyphenylacetic acidmethylester*	1.10549	0.0866302	-3.52899	down
464	3'-O-Beta-D-Glucopyranosyl plumbagic acid	1.03367	0.07595	-3.71881	down
465	3,4-Dimethoxybenzoic acid; Veratric acid	1.10103	0.0427779	-4.54699	down
466	3,4-Dimethoxycinnamic acid	1.10475	0.0908013	-3.46114	down
467	3-[(2S,3S)-2-(4-hydroxy-3-methoxyphenyl)-7-methoxy-3-methyl-2,3-dihydro-1-benzofuran-5-yl]prop-2-enal	1.10359	0.0654371	-3.93375	down
468	4-Methoxycinnamic acid	1.10186	0.0875451	-3.51383	down
469	4-O-(3'-O-alpha-D-Glucopyranosyl)caffeoylquinic acid	1.04913	0.0861429	-3.53712	down
470	4-O-(4'-O-alpha-D-Glucopyranosyl)caffeoylquinic acid	1.01692	0.0492912	-4.34253	down
471	4-O-Glucosyl-sinapate	1.09729	0.0847369	-3.56087	down
472	4-caffeoylshikimic acid	1.09444	0.0833129	-3.58532	down
473	5-Acetylsalicylic acid	1.08024	0.130271	-2.94041	down
474	5-Glucosyloxy-2-Hydroxybenzoic acid methyl ester	1.10456	0.115458	-3.11456	down
475	5-O-Caffeoylshikimic acid	1.09781	0.0993046	-3.332	down
476	Benzyl β-primeveroside*	1.09972	0.0942997	-3.4066	down
477	D-Threo-guaiacylglycerol-7-O-β-D-glucoside	1.10365	0.0877055	-3.51119	down
478	Dihydrocaffeoylglucose*	1.10254	0.100624	-3.31296	down
479	Ethyl Vanillate	1.09846	0.0868762	-3.5249	down
480	Furo(2,3-f)-1,3-bewnzodioxole	1.09819	0.0964874	-3.37352	down
481	Glucosyringic acid	1.10421	0.078942	-3.66306	down
482	Guaiacylglycerol 8-O-(1''-O-Glucosyl)Vanillic Acid Ether	1.05625	0.0892137	-3.48659	down
483	Methyl 3-O-glucosyl-4-hydroxybenzoate	1.10279	0.0804444	-3.63586	down
484	Methyl Cinnamate	1.09886	0.0828375	-3.59357	down
485	Methyl Hydroxycinnamate	1.07919	0.127057	-2.97645	down
486	O-Caffeoyl maltotriose	1.10155	0.0677419	-3.88381	down
487	Orobanchoside	1.08656	0.0901952	-3.47081	down
488	Paeonol	1.10432	0.0918971	-3.44384	down
489	Phenylpropionic acid-O-β-D-glucopyranoside	1.10362	0.0929746	-3.42702	down
490	Protocatechuic acid xylosyl xyloside	1.09985	0.0789117	-3.66362	down
491	Sibiricose A5*	1.08274	0.00659693	-7.24399	down
492	Syringic acid	1.06196	0.0945137	-3.40333	down
493	Vnilloylcaffeoyltartaric acid	1.09023	0.0418145	-4.57985	down
494	p-Coumaric acid methyl ester	1.08877	0.105603	-3.24328	down
	Quinones
495	2,5-Dimethoxybenzoquinone*	1.10332	0.0174165	-5.8434	down
496	2,6-Dimethoxy-1,4-benzoquinone*	1.10433	0.0169125	-5.88577	down
497	Aloe-Emodin-9-Anthrone	1.10414	12.1105	3.59819	up
498	2-Hydroxy-2,3-dihydronaphthalene-1,4-dione	1.10488	0.0870063	-3.52274	down
499	4,5,8-Trihydroxy-α-tetralone	1.07766	0.0370479	-4.75447	down
500	8-O-methyl-7-hydroxyaloin	1.03624	0.069958	-3.83737	down
	Steroids
501	(3b,16a,20R)-25-Acetoxy-3,16,20,22-tetrahydroxy-5-cucurbiten-11-one 3-glucoside	1.09593	0.0665412	-3.90961	down
502	3β,14β-dihydroxy-pregn-5-en-20-one	1.08924	0.0552731	-4.17728	down
	Tannins
503	Procyanidin A1	1.10505	13.6061	3.76618	up
	Terpenoids
504	19-Hydroxy-2-(hydroxymethyl)-A(1)-norursa-2,12-dien-28-oic acid (Coleonolic acid)*	1.07807	0.271614	-1.88037	down
505	2,19-Dihydroxy-3-oxours-12-en-28-oic acid	1.07585	0.15703	-2.67089	down
506	2,3,19-Trihydroxyurs-12-en-28-oic acid (Tormentic acid)	1.07559	0.266748	-1.90645	down
507	2,3,23-Trihydroxyolean-12-en-28-oic acid*	1.08275	0.264908	-1.91644	down
508	2,3,23-Trihydroxyurs-12,19(29)-dien-28-oic acid	1.05124	0.237929	-2.0714	down
509	2,3,23-Trihydroxyurs-12-en-28-oic acid*	1.09025	0.261042	-1.93764	down
510	2,3-Dihydroxyurs-12,18-dien-28-oic acid (Goreishic Acid I)	1.04061	0.334308	-1.58075	down
511	3-Oxo-19-hydroxyurs-12-en-28-oic acid (Pomonic acid)*	1.04376	0.274503	-1.86511	down
512	6''-O-Caffeoylharpagide	1.08727	7.15981	2.83992	up
513	Dihydrophaseic acid	1.07342	0.153239	-2.70614	down
514	Eucommioside	1.07827	5.27319	2.39868	up
515	Hydroxycarvine	1.09274	5.23483	2.38814	up
516	Niga-ichigoside F3	1.07643	0.0872224	-3.51916	down
517	Trachelosperonide B-1	1.04481	0.415035	-1.2687	down
518	Andrographiside	1.07646	8.01174	3.00212	up
519	Dehydrovomifoliol	1.10437	14.4917	3.85716	up
520	Loliolide	1.10379	8.53276	3.09301	up
521	3'-O-D-glucosylgentiopicroside	1.10492	0.0653661	-3.93531	down
522	3-Hydroxy-23-oxoolean-12-en-28-oic acid (Gypsogenin)	1.099	0.0643577	-3.95774	down
523	3-Hydroxyolean-12-ene-28,29-dioic acid (Serratagenic Acid)	1.07442	0.0914635	-3.45066	down
524	3S-3-hydroxy-β-damascon	1.02964	0.0770535	-3.698	down
525	Elaeocarpucin G	1.08591	0.136688	-2.87104	down
526	Genipin	1.09634	0.0653315	-3.93608	down
527	Majoroside	1.10544	0.0617261	-4.01797	down
528	Nuezhengalaside	1.08922	0.0787199	-3.66713	down
529	Oleuropeinic acid	1.10426	0.138336	-2.85375	down
	Saccharides
530	D-Arabinono-1,4-lactone	1.08241	0.363806	-1.45876	down
531	D-Arabinose*	1.02613	6.93912	2.79475	up
532	D-Glucose*	1.0428	23.5843	4.55975	up
533	D-Mannose*	1.0901	12.9314	3.6928	up
534	D-Ribose	1.08147	0.0784103	-3.67281	down
535	D-Threonic Acid	1.05864	2.50251	1.32338	up
536	D-Xylonic acid	1.08352	4.46105	2.15738	up
537	Glucan	1.09568	0.4588	-1.12406	down
538	L-Xylose*	1.04663	4.31964	2.11091	up
539	Maltopentaose	1.07702	0.44275	-1.17543	down
540	Planteose	1.09469	0.401858	-1.31524	down
541	Raffinose*	1.0411	9.59586	3.26241	up
542	1,6-anhydro-β-D-glucose	1.10488	36.0361	5.17137	up
543	1,5-Anhydro-D-glucitol	1.10239	61.8173	5.94994	up
544	D-Galacturonic acid*	1.07816	112.529	6.81415	up
545	D-Glucoronic acid*	1.10358	34.9779	5.12837	up
546	D-Panose*	1.09153	21.5904	4.43232	up
547	Manninotriose	1.05681	11.1785	3.48266	up
548	3-Phospho-D-glyceric acid	1.10543	0.142273	-2.81327	down
549	L-Arabitol	1.1028	0.129551	-2.94841	down
	Vitamin
550	D-Pantothenic Acid	1.08566	0.224255	-2.15679	down
551	Isonicotinic acid	1.09614	0.106866	-3.22612	down
552	N-(beta-D-Glucosyl)nicotinate*	1.09589	0.0529308	-4.23975	down
553	Nicotinamide	1.03796	0.270365	-1.88702	down
554	Nicotinic acid (Vitamin B3)	1.07235	0.0811002	-3.62415	down
555	Orotic acid (Vitamin B13)	1.0571	0.242818	-2.04205	down
556	Pyridoxal	1.1012	0.110786	-3.17415	down
557	Pyridoxine	1.08779	0.180028	-2.47371	down
558	Thiamine (Vitamin B1)	1.01765	0.229453	-2.12373	down
559	Riboflavin (Vitamin B2)	1.09246	0.117433	-3.09009	down
	Ketone compounds
560	1-phenyl-7-(4-hydroxyphenyl)-4-ene-3-heptanone	1.01475	0.48492	-1.04418	down
561	2,5-Dihydroxyacetophenone	1.10358	0.150514	-2.73203	down
562	Dihydronaphthalenone	1.10495	0.00828072	-6.91603	down
563	Trans-dehydrorosinone	1.10189	0.0387302	-4.6904	down
564	2'-Aminoacetophenone	1.10416	0.0861503	-3.537	down
565	Roseoside	1.09931	0.0887795	-3.49363	down
	Alcohol compounds
566	1,4-Benzodioxin-6-propanol	1.01321	0.46651	-1.10002	down
567	2,6-Dimethyl-7-octene-2,3,6-triol	1.08844	0.390589	-1.35628	down
568	3,4-methylenedioxy cinnamyl alcohol	1.10217	0.0761588	-3.71485	down
569	D-Panthenol	1.1012	0.106883	-3.22589	down
	Chromone
570	Cimifugin-7-O-glucoside	1.07816	0.229947	-2.12063	down
571	6-Hydroxymellein	1.08487	0.105948	-3.23857	down
	Others
572	2,5-Dihydroxybenzaldehyde*	1.10499	0.230098	-2.11968	down
573	4-Methoxybenzaldehyde	1.08188	0.103406	-3.2736	down
574	4-MethoxycinnaMaldehyde	1.09241	0.305398	-1.71124	down
575	Protocatechualdehyde*	1.10299	0.246071	-2.02285	down
576	Vanillin; 4-Hydroxy-3-Methoxybenzaldehyde	1.09366	0.397567	-1.33073	down
577	Butylphthalide	1.10022	0.167591	-2.57698	down
578	3-(((S)-1-carboxy-2-phenylethyl)amino)-2,5-dihydroxycyclopentane-1-carboxylic acid	1.10274	15.5963	3.96313	up
579	3-Methylbutyl 6-O-(alpha-L-arabinopyranosyl)-beta-D-glucopyranoside	1.08858	0.0754275	-3.72877	down
580	4-[3-(4,8-dimethylnona-3,7-dienyl)-3-methyloxiran-2-yl]butan-2-one	1.10208	8.97416	3.16578	up
581	Coumaroyl Quinic Acid	1.10447	0.0125511	-6.31605	down
582	Glucosyl 7-methyl-3-methyleneoctane-1,2,6,7-tetraol	1.04318	0.401185	-1.31766	down
583	Juglanoside E	1.1045	0.0162655	-5.94204	down
584	Mahuanin B	1.03851	0.137913	-2.85817	down
585	Pyridine-4-formyl-O-β-D-glucopyranoside*	1.07139	0.108874	-3.19927	down
586	glycoric acid	1.07346	2.74052	1.45445	up
587	Glucosyl 3,7-dimethyloct-2-ene-1,6,7-triol	1.10534	17.5745	4.13541	up
588	Glucosyl 6,9-dihydroxydec-4-enoic acid	1.10259	9.06914	3.18097	up
589	Glucosyl 9-hydroxy-3-methyldec-2-enoic acid	1.10547	10.5098	3.39366	up
590	dihydro-4-hydroxy-5-hydroxymethyl-2(3H)-furanone	1.10558	12.9532	3.69524	up
591	2-hydroxy-2-isobutylsuccinic acid	1.1052	0.0469057	-4.41409	down
592	6'-O-caffeoylcatalpol	1.10574	0.0458605	-4.4466	down
593	Cornusoside A	1.09492	0.0956808	-3.38563	down
594	Rugosic acid A	1.1031	0.0654264	-3.93398	down
595	Sulfo jasmonate	1.10501	0.072194	-3.79198	down
