# Supplementary material for: Determination of metabolite differences between loquat nectar and honey by UPLC-MS/MS
Source: PeerJ journal article supplement (doi:10.7717/peerj.19988), 2025-09-16
Supplement: Table_S6.xlsx [file Table_S6.xlsx]

## Sheet: Sheet1
Table S6 The species-specific non-volatile metabolites in DHPHM and DHPFM.
Species	Compounds	Class
DHPFM	4-Methylhippuric Acid	Amino acids and derivatives
	Abu-His-OH	Amino acids and derivatives
	His-Phe	Amino acids and derivatives
	L-Prolyl-L-Leucine	Amino acids and derivatives
	L-Tyrosyl-L-serine	Amino acids and derivatives
	L-α-Glutamyl-L-Glutamic Acid	Amino acids and derivatives
	N-(1-Deoxy-1-fructosyl)Asparagine	Amino acids and derivatives
	N-(1-Deoxy-1-fructosyl)Phenylalanine	Amino acids and derivatives
	N-(1-Deoxy-1-fructosyl)Valine	Amino acids and derivatives
	Oxiglutatione	Amino acids and derivatives
	Ser-Gly-Phe	Amino acids and derivatives
	2-Phenylethanol	Phenolic acids
	Bengenin	Phenolic acids
	Cornoside	Phenolic acids
	Demethyl coniferin	Phenolic acids
	2'-Deoxyadenosine-5'-monophosphate	Nucleotides and derivatives
	9-(Arabinosyl)hypoxanthine	Nucleotides and derivatives
	Guanosine 5'-monophosphate	Nucleotides and derivatives
	Inosine	Nucleotides and derivatives
	Toyocamycin	Nucleotides and derivatives
	3-O-Acetylpinobanksin	Flavonoids
	Didymin (Isosakuranetin-7-O-rutinoside)*	Flavonoids
	Kaempferol-3-O-(6''-p-Coumaroyl)glucoside (Tiliroside)	Flavonoids
	Methylhesperidin	Flavonoids
	Naringenin (5,7,4'-Trihydroxyflavanone)	Flavonoids
	Pinocembrin (Dihydrochrysin)	Flavonoids
	Poncirin (Isosakuranetin-7-O-neohesperidoside)*	Flavonoids
	Aloe-Emodin-9-Anthrone	Quinones
	Divanillyltetrahydrofuran	Lignans and Coumarins
	Nodakenin	Lignans and Coumarins
	Secoisolariciresinol	Lignans and Coumarins
	Secoisolariciresinol 4-O-glucoside	Lignans and Coumarins
	Procyanidin A1	Tannins
	3α-Dihydrocadambine	Alkaloids
	Caffeine	Alkaloids
	Hexadecyl ethanolamine	Alkaloids
	L-Tyramine	Alkaloids
	N-benzoyl-2-aminoethyl-β-D-glucopyranoside	Alkaloids
	Andrographiside	Terpenoids
	Dehydrovomifoliol	Terpenoids
	Loliolide	Terpenoids
	3-Hydroxydecanedioic acid	Organic acids
	Citric acid glucoside	Organic acids
	Dihydroabscisic Acid 4'-O-glucoside	Organic acids
	Isocitric acid-1-O-diglucoside	Organic acids
	Mandelic acid	Organic acids
	Oxalic acid	Organic acids
	Sebacic acid	Organic acids
	1-(2,3-dihydroxypropoxy)-3-(((2-(dimethylamino)ethoxy)(hydroxy)phosphoryl)oxy)propan-2-yl (11Z,14Z)-octadeca-11,14-dienoate	Lipids
	1-(2,3-dihydroxypropoxy)-3-(((2-(dimethylamino)ethoxy)(hydroxy)phosphoryl)oxy)propan-2-yl (8E,11Z,14Z)-octadeca-8,11,14-trienoate	Lipids
	1-(2,3-dihydroxypropoxy)-3-(((2-(dimethylamino)ethoxy)(hydroxy)phosphoryl)oxy)propan-2-yl palmitate*	Lipids
	1-(9Z,12Z-octadecadienoyl)-sn-glycero-3-phosphocholine	Lipids
	10-Hydroxy-2-Decenoic Acid	Lipids
	10-Hydroxydecanoic acid	Lipids
	13-KODE; (9Z,11E)-13-Oxooctadeca-9,11-dienoic acid	Lipids
	2-(2,3-dihydroxypropoxy)-3-(((2-(dimethylamino)ethoxy)(hydroxy)phosphoryl)oxy)propyl (11Z,14Z)-octadeca-11,14-dienoate	Lipids
	2-(2,3-dihydroxypropoxy)-3-(((2-(dimethylamino)ethoxy)(hydroxy)phosphoryl)oxy)propyl (8E,11Z,14Z)-octadeca-8,11,14-trienoate	Lipids
	2-(2,3-dihydroxypropoxy)-3-(((2-(dimethylamino)ethoxy)(hydroxy)phosphoryl)oxy)propyl palmitate*	Lipids
	2-Palmitoylglycerol*	Lipids
	2-aminotetracoSane-1,5,23-triol	Lipids
	LysoPC 18:1	Lipids
	LysoPC 18:1(2n isomer)	Lipids
	LysoPC 18:3(2n isomer)	Lipids
	LysoPC(18:3(9Z,12Z,15Z))	Lipids
	LysoPE 16:0	Lipids
	LysoPE 16:0(2n isomer)	Lipids
	LysoPE 18:2	Lipids
	LysoPE 18:2(2n isomer)	Lipids
	LysoPE 18:3	Lipids
	LysoPE 18:3(2n isomer)	Lipids
	Monopalmitin*	Lipids
	1,5-Anhydro-D-glucitol	Saccharides
	D-Galacturonic acid*	Saccharides
	D-Glucoronic acid*	Saccharides
	Manninotriose	Saccharides
	D-Panose*	Saccharides
	Glucosyl 3,7-dimethyloct-2-ene-1,6,7-triol	Others
	Glucosyl 6,9-dihydroxydec-4-enoic acid	Others
	Glucosyl 9-hydroxy-3-methyldec-2-enoic acid	Others
	dihydro-4-hydroxy-5-hydroxymethyl-2(3H)-furanone	Others
DHPHM	DL-Methionine	Amino acids and derivatives
	Ile-Phe	Amino acids and derivatives
	L-Alanyl-L-Phenylalanine	Amino acids and derivatives
	L-Aspartyl-L-Phenylalanine	Amino acids and derivatives
	L-Carnosine	Amino acids and derivatives
	L-Glutaminyl-L-isoleucine	Amino acids and derivatives
	L-Methionine	Amino acids and derivatives
	L-Valyl-L-Phenylalanine	Amino acids and derivatives
	L-γ-Glutamyl-L-leucine	Amino acids and derivatives
	Met-Met	Amino acids and derivatives
	N-carboxy-N-(2-oxo-2-phenylethyl)-L-alanine	Amino acids and derivatives
	S-(5'-Adenosy)-L-homocysteine	Amino acids and derivatives
	S-(Methyl)glutathione	Amino acids and derivatives
	Thr-Trp	Amino acids and derivatives
	γ-Glutamyltyrosine	Amino acids and derivatives
	1,3-O-Dicaffeoylquinic Acid (Cynarin)	Phenolic acids
	1-O-Sinapoyl-β-D-glucose	Phenolic acids
	1-O-Vanilloyl-D-Glucose	Phenolic acids
	1-O-rhamnose-3-O-Caffeoyl Quinic Acid	Phenolic acids
	2,5-Dihydroxybenzoic acid-5-O-glucoside	Phenolic acids
	2,6-Dimethoxybenzoic acid	Phenolic acids
	2-Amino-3-methoxybenzoic acid	Phenolic acids
	2-Feruloyl-sn-glycerol	Phenolic acids
	2-O-(1'-O-glucosylCaffeoyl)hydroxycitric Acid	Phenolic acids
	2-O-P-Coumaroylhydroxycitric Acid	Phenolic acids
	2-β-D-Glucopyranosyloxy-5-hydroxyphenylacetic acidmethylester*	Phenolic acids
	3'-O-Beta-D-Glucopyranosyl plumbagic acid	Phenolic acids
	3,4-Dimethoxybenzoic acid; Veratric acid	Phenolic acids
	3,4-Dimethoxycinnamic acid	Phenolic acids
	3-[(2S,3S)-2-(4-hydroxy-3-methoxyphenyl)-7-methoxy-3-methyl-2,3-dihydro-1-benzofuran-5-yl]prop-2-enal	Phenolic acids
	4-Methoxycinnamic acid	Phenolic acids
	4-O-(3'-O-alpha-D-Glucopyranosyl)caffeoylquinic acid	Phenolic acids
	4-O-(4'-O-alpha-D-Glucopyranosyl)caffeoylquinic acid	Phenolic acids
	4-O-Glucosyl-sinapate	Phenolic acids
	4-caffeoylshikimic acid	Phenolic acids
	5-Acetylsalicylic acid	Phenolic acids
	5-Glucosyloxy-2-Hydroxybenzoic acid methyl ester	Phenolic acids
	5-O-Caffeoylshikimic acid	Phenolic acids
	Benzyl β-primeveroside*	Phenolic acids
	D-Threo-guaiacylglycerol-7-O-β-D-glucoside	Phenolic acids
	Dihydrocaffeoylglucose*	Phenolic acids
	Ethyl Vanillate	Phenolic acids
	Furo(2,3-f)-1,3-bewnzodioxole	Phenolic acids
	Glucosyringic acid	Phenolic acids
	Guaiacylglycerol 8-O-(1''-O-Glucosyl)Vanillic Acid Ether	Phenolic acids
	Methyl 3-O-glucosyl-4-hydroxybenzoate	Phenolic acids
	Methyl Cinnamate	Phenolic acids
	Methyl Hydroxycinnamate	Phenolic acids
	O-Caffeoyl maltotriose	Phenolic acids
	Orobanchoside	Phenolic acids
	Paeonol	Phenolic acids
	Phenylpropionic acid-O-β-D-glucopyranoside	Phenolic acids
	Protocatechuic acid xylosyl xyloside	Phenolic acids
	Sibiricose A5*	Phenolic acids
	Syringic acid	Phenolic acids
	Vnilloylcaffeoyltartaric acid	Phenolic acids
	p-Coumaric acid methyl ester	Phenolic acids
	1-Methyladenine	Nucleotides and derivatives
	2-Deoxyribose-1-phosphate*	Nucleotides and derivatives
	2-Deoxyribose-5'-phosphate*	Nucleotides and derivatives
	Flavin Single Nucleotide(FMN)	Nucleotides and derivatives
	N-(p-hydroxybenzyl) adenosine	Nucleotides and derivatives
	1,3,6,7-Tetrahydroxyxanthone	Flavonoids
	2,4,2',4'-tetrahydroxy-3'-prenylchalcone	Flavonoids
	3',5',5,7-Tetrahydroxy-4'-methoxyflavanone-3'-O-glucoside	Flavonoids
	5,6,3',4'-Tetrahydroxy-3,7-dimethoxyflavone	Flavonoids
	5,7,3',4'-Tetrahydroxy-6-methoxyflavone-8-C-[glucosyl-(1-2)]-glucoside	Flavonoids
	6-Hydroxykaempferol-3,6-O-Diglucoside	Flavonoids
	6-Hydroxykaempferol-7-O-glucoside	Flavonoids
	7,3',4'-Trihydroxyquercetin glucoside	Flavonoids
	7-O-Methylaloesin	Flavonoids
	Azaleatin (5-O-Methylquercetin)	Flavonoids
	Butin-7-O-glucoside	Flavonoids
	Cyanidin-3-O-galactoside*	Flavonoids
	Fustin	Flavonoids
	Gossypetin-3-O-(6''-malonyl)glucoside*	Flavonoids
	Gossypetin-3-O-glucoside*	Flavonoids
	Gossypetin-7-O-rhamnoside; Rhodiolgin	Flavonoids
	Isorhamnetin-3-O-(6''-malonyl)glucoside-7-O-rhamnoside	Flavonoids
	Isorhamnetin-3-O-rutinoside-7-O-rhamnoside	Flavonoids
	Kaempferol-3-O-sambubioside	Flavonoids
	Kaempferol-3-O-xylosyl(1→2)glucoside	Flavonoids
	Luteolin-7,3'-di-O-glucoside	Flavonoids
	Luteolin-7-O-gentiobioside	Flavonoids
	Myricetin-3-O-(6''-malony)glucoside*	Flavonoids
	Myricetin-3-O-galactoside*	Flavonoids
	Myricetin-3-O-β-D-glucoside*	Flavonoids
	Quercetagetin-7-O-glucoside(Quercetagitrin)*	Flavonoids
	Quercetin 3-O-glucoside 7-O-xyloside	Flavonoids
	Quercetin-3-O-(6''-O-arabinosyl)glucoside	Flavonoids
	Sakuranin	Flavonoids
	2-Hydroxy-2,3-dihydronaphthalene-1,4-dione	Quinones
	4,5,8-Trihydroxy-α-tetralone	Quinones
	8-O-methyl-7-hydroxyaloin	Quinones
	(7S,8R-Threo-3',4,9'-trihydroxy-3-methoxy-4',7-epoxy-neolignan-9-O-rhamnoside	Lignans and Coumarins
	6,7-Dihydroxy-4-methylcoumarin	Lignans and Coumarins
	6-Hydroxy-4-(4-hydroxy-3-methoxyphenyl)-7-methoxy-naphtho[2,3-c]furan-1,3-dione-1	Lignans and Coumarins
	Agrimonolide	Lignans and Coumarins
	Coumarin	Lignans and Coumarins
	Dihydrodehydrodiconiferyl alcohol	Lignans and Coumarins
	Esculetin-7-O-quinic acid	Lignans and Coumarins
	Hydroxydaphnoretin glucoside	Lignans and Coumarins
	Isofraxidin-7-O-glucoside	Lignans and Coumarins
	Pinoresinol-4,4'-O-diglucoside	Lignans and Coumarins
	Pinoresinol-4-O-glucoside	Lignans and Coumarins
	Scoparone	Lignans and Coumarins
	Scopoletin-7-O-glucoside (Scopolin)	Lignans and Coumarins
	Syringic acid 4-O-rhamnoside	Lignans and Coumarins
	10-Formyltetrahydrofolic Acid	Alkaloids
	2-oxindole-3-acetic acid	Alkaloids
	8-hydroxyquinoline	Alkaloids
	Cyclohexylamine	Alkaloids
	Methoxyindoleacetic acid	Alkaloids
	N(2)-methylharmine	Alkaloids
	N-(4-Aminobutyl)benzamide	Alkaloids
	Octahydroisoindole	Alkaloids
	Prunasin	Alkaloids
	Rubusine	Alkaloids
	Sambunigrin	Alkaloids
	Spiramine I	Alkaloids
	Spiramine N	Alkaloids
	Α-hydroxyquinoline	Alkaloids
	3'-O-D-glucosylgentiopicroside	Terpenoids
	3-Hydroxy-23-oxoolean-12-en-28-oic acid (Gypsogenin)	Terpenoids
	3-Hydroxyolean-12-ene-28,29-dioic acid (Serratagenic Acid)	Terpenoids
	3S-3-hydroxy-β-damascon	Terpenoids
	Elaeocarpucin G	Terpenoids
	Genipin	Terpenoids
	Majoroside	Terpenoids
	Nuezhengalaside	Terpenoids
	Oleuropeinic acid	Terpenoids
	2-Hydroxy-2-methyl-3-oxobutanoic acid*	Organic acids
	3-Benzoyl-ShikimicAcid	Organic acids
	3-Dehydroshikimic acid	Organic acids
	3-Ureidopropionic Acid	Organic acids
	Mandelic acid-β-glucoside	Organic acids
	Tuberonic acid glucoside	Organic acids
	α-Ketoglutaric acid	Organic acids
	3β,14β-dihydroxy-pregn-5-en-20-one	Steroids
	10,16-Dihydroxypalmitic acid	Lipids
	12(13)Ep-9-KODE	Lipids
	9,10,18-Trihydroxystearic acid	Lipids
	D-Panthenol	Alcohol compounds
	6-Hydroxymellein	Chromone
	2'-Aminoacetophenone	Ketone compounds
	Roseoside	Ketone compounds
	Butylphthalide	Others
	2-hydroxy-2-isobutylsuccinic acid	Others
	6'-O-caffeoylcatalpol	Others
	Cornusoside A	Others
	Rugosic acid A	Others
	Sulfo jasmonate	Others
	3-Phospho-D-glyceric acid	Saccharides
	L-Arabitol	Saccharides
	Riboflavin (Vitamin B2)	Vitamin
